# Supplementary material for: Comparative study of treatment interventions for patellar tendinopathy: a protocol for a randomised controlled trial
Source: PubMed Central journal article supplement — BMJ Open. 2020 Feb 16;10(2):e034304. doi: 10.1136/bmjopen-2019-034304 (PMC7045155; doi:10.1136/bmjopen-2019-034304), 2020-02-16
Supplement: bmjopen-2019-034304.draft_revisions.pdf [file bmjopen-2019-034304.draft_revisions.pdf]

# BMJ Open

BMJ Open is committed to open peer review. As part of this commitment we make the peer review history of every article we publish publicly available.

When an article is published we post the peer reviewers' comments and the authors' responses online. We also post the versions of the paper that were used during peer review. These are the versions that the peer review comments apply to.

The versions of the paper that follow are the versions that were submitted during the peer review process. They are not the versions of record or the final published versions. They should not be cited or distributed as the published version of this manuscript.

BMJ Open is an open access journal and the full, final, typeset and author-corrected version of record of the manuscript is available on our site with no access controls, subscription charges or pay-per-view fees (<http://bmjopen.bmj.com>).

If you have any questions on BMJ Open's open peer review process please email [info.bmjopen@bmj.com](mailto:info.bmjopen@bmj.com)

# BMJ Open

## A comparative study of three treatment interventions for chronic patellar tendinopathy: a protocol for a randomized controlled trial

|                               |                                                                                                                                                                                                                                     |
|-------------------------------|-------------------------------------------------------------------------------------------------------------------------------------------------------------------------------------------------------------------------------------|
| Journal:                      | <i>BMJ Open</i>                                                                                                                                                                                                                     |
| Manuscript ID                 | bmjopen-2019-034304                                                                                                                                                                                                                 |
| Article Type:                 | Protocol                                                                                                                                                                                                                            |
| Date Submitted by the Author: | 13-Sep-2019                                                                                                                                                                                                                         |
| Complete List of Authors:     | Lopez-Royo, Maria Pilar<br>Gómez-Trullén, Eva Maria<br>Ortiz-Lucas, Maria<br>Galán-Diaz, Rita Maria<br>Bataller-Cervero, Ana Vanessa<br>Al-bolushi, Zaid<br>Hamam-Alcober, Yasmina<br>Herrero, Pablo; San Jorge Univ, Physiotherapy |
| Keywords:                     | Eccentric Exercise, Chronic Patellar Tendinopathy, Tendinopathy, Percutaneous Needle Electrolysis, Dry Needling                                                                                                                     |
|                               |                                                                                                                                                                                                                                     |

SCHOLARONE™  
Manuscripts

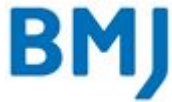

I, the Submitting Author has the right to grant and does grant on behalf of all authors of the Work (as defined in the below author licence), an exclusive licence and/or a non-exclusive licence for contributions from authors who are: i) UK Crown employees; ii) where BMJ has agreed a CC-BY licence shall apply, and/or iii) in accordance with the terms applicable for US Federal Government officers or employees acting as part of their official duties; on a worldwide, perpetual, irrevocable, royalty-free basis to BMJ Publishing Group Ltd ("BMJ") its licensees and where the relevant Journal is co-owned by BMJ to the co-owners of the Journal, to publish the Work in this journal and any other BMJ products and to exploit all rights, as set out in our [licence](#).

The Submitting Author accepts and understands that any supply made under these terms is made by BMJ to the Submitting Author unless you are acting as an employee on behalf of your employer or a postgraduate student of an affiliated institution which is paying any applicable article publishing charge ("APC") for Open Access articles. Where the Submitting Author wishes to make the Work available on an Open Access basis (and intends to pay the relevant APC), the terms of reuse of such Open Access shall be governed by a Creative Commons licence – details of these licences and which [Creative Commons](#) licence will apply to this Work are set out in our licence referred to above.

Other than as permitted in any relevant BMJ Author's Self Archiving Policies, I confirm this Work has not been accepted for publication elsewhere, is not being considered for publication elsewhere and does not duplicate material already published. I confirm all authors consent to publication of this Work and authorise the granting of this licence.

1 A comparative study of three treatment interventions for chronic patellar tendinopathy:  
2 a protocol for a randomized controlled trial

3 López-Royo MP<sup>a,b</sup>, Gómez-Trullén EM<sup>b</sup>, Ortiz-Lucas M<sup>a</sup>, Galán-Díaz RM<sup>a</sup>, Bataller-Cervero  
4 AV<sup>a</sup>, AL-boloushi Z, Hamam-Alcober Y<sup>a</sup>, Herrero P<sup>a\*</sup>

## 5 AFFILIATIONS

6 **A.** iPhysio Research Group. Universidad San Jorge. Campus Universitario, Autov.  
7 A23 km 299, 50830. Villanueva de Gállego, Zaragoza, Spain.

8 **B.** Universidad de Zaragoza. Facultad de Ciencias de la Salud. Dpto. de Fisiatría y  
9 Enfermería. C/ Domingo Miral s/n, 50009 - Zaragoza, Spain.

## 11 \*CORRESPONDENCE TO:

12 Dr. Pablo Herrero. iPhysio Research Group. Universidad San Jorge. Campus  
13 Universitario, Autov A23, Km 299, 50830 Villanueva de Gállego, Zaragoza, Spain.  
14 Tel.: (+34) 976 060 100 Fax: 976 077 581. Email: pherrero@usj.es

## 15 ADDITIONAL AUTHOR INFORMATION

16 Maria Pilar López Royo. Emails: mplopez@usj.es

17 Eva María Gómez Trullén. Email: evagomez@unizar.es

18 María Ortiz Lucas. Email: mortiz@usj.es

19 Rita María Galán Díaz. Email: rmgalan@usj.es

20 Ana Vanessa Bataller-Cervero. Email: avbataller@usj.es

21 Yasmina Hamam-Alcober. Email: yhamam@usj.es

22 Zaid AL-boloushi. Email: boloushi@gmail.com

1  
2  
3 **23 ABSTRACT**  
4

5 **24 Introduction:** Chronic patellar tendinopathy is a degenerative disease of the patellar  
6  
7  
8 **25** tendon, which affects athletes from a variety of sports, and is especially predominant in  
9  
10  
11 **26** sports involving high-impact jumping. The aim of this study is to compare the  
12  
13 **27** effectiveness of needling therapies in order to determine the most effective treatment  
14  
15 **28** protocol of chronic patellar tendinopathy.

16  
17 **29 Methods and analysis:** This study is a randomized controlled trial with blinded  
18  
19  
20 **30** participants. Measurements will be carried out by a specially trained blind assessor. A  
21  
22 **31** sample of 57 patients with a medical diagnosis of patellar tendinopathy will participate  
23  
24 **32** in this study for a minimum of three months and will be divided into three treatment  
25  
26 **33** groups. Eligible participants will be randomly allocated to receive either: (a) treatment  
27  
28 **34** group with Percutaneous Needle Electrolysis, (b) treatment group with Dry Needle or (c)  
29  
30 **35** treatment group with placebo needling and all of the them realized eccentric exercise.  
31  
32  
33 **36** Functionality and muscle strength parameters, pain, histological changes and patient  
34  
35 **37** perceived quality of life shall be evaluated by Visa-p, jumps, VAS, US images and SF-  
36  
37 **38** 36, respectively. Follow-up measurements will take place two and 12 weeks after the final  
38  
39 **39** treatment. The expected findings could be a breakthrough for the treatment of this injury  
40  
41  
42 **40** as they would allow to define the most effective treatment protocol to deal with this  
43  
44 **41** disease and avoid the consequences that derive from it, reflecting all of this in a new  
45  
46 **42** relapse prevention.

47  
48  
49 **43 Ethics and dissemination:** This protocol has been approved by Ethics Committee of  
50  
51  
52 **44** Aragon (N° PI15/0017). The trial will be conducted in accordance with the Declaration  
53  
54 **45** of Helsinki.

55  
56 **46 Trial Registration Number:** NCT02498795.  
57  
58  
59 **47**  
60

## 48 **Strengths and limitations of this study**

49 - This randomised clinical trial will report the effects in functionality and pain of three  
50 different treatments at short and long term.

51 - The double-blinded and placebo-control design improve the objectivity and help reduce  
52 bias.

53 - The effects between two minimally invasive treatments in physical therapy will be  
54 compared for the first time in patellar tendinopathy.

55

## 56 **INTRODUCTION**

57 Chronic patellar tendinopathy (CPT), also known as jumper's knee, is a degenerative  
58 disease of the patellar tendon resulting in anterior knee pain associated with focal and  
59 palpable tenderness at the inferior pole of the patella. This disorder has similar histologic  
60 findings to other tendon disorders characterized by an increased thickness of the tendon  
61 and changes in vascularity, and cellularity, with incompletely healed tendon micro-  
62 ruptures and disturbed collagen distribution [1].

63 This disorder affects athletes from a variety of sports, and is especially predominant in  
64 sports involving high-impact jumping. The overall prevalence of CPT in non-elite players  
65 is 8.5%, although this figure increases in sports that place high demands on the patellar  
66 ligament, increasing up to 14.2% in volleyball athletes. Among elite volleyball and  
67 basketball players, a prevalence of 45% and 32%, respectively, has been reported. In  
68 addition, jumper's knee is almost twice as common among male non-elite athletes when  
69 compared with female athletes [2].

70 The diagnosis is typically based on the clinical history and symptomatic findings.

71 Currently, imaging techniques, such as color-Doppler ultrasound (CD-US) and gray scale  
72 ultrasound (GS-US) may represent the best combinations to confirm clinically diagnosed

1  
2  
3 73 CPT. The GS-US has higher sensitivity than magnetic resonance imaging (MRI).  
4  
5 74 Therefore, ultrasound (US) techniques are more accurate than MRI for confirming  
6  
7 75 clinically diagnosed CPT [3].  
8  
9  
10 76 Treatments used for CPT fall into two major groups. On the one hand, medical treatments  
11  
12 77 which include non-steroidal anti-inflammatory drugs (NSAIDs), platelet-rich plasma  
13  
14 78 injection [4], polidocanol [3] and autologous growth factors [5]. On the other hand, physical  
15  
16 79 therapies, including both conservative and invasive approaches (needling techniques).  
17  
18  
19 80 Conservative therapies are generally accepted as the first line approach for managing  
20  
21 81 CPT, with eccentric exercise (EE) considered the gold standard [6, 7]. In 2012, EE was  
22  
23 82 shown to be effective in the treatment of tendinopathies at various locations of the body,  
24  
25 83 including CPT, and there was a greater likelihood of clinical improvement when  
26  
27 84 performed on a declined surface [6,8]. In recent years, further evidence now supports the  
28  
29 85 fact that exercise is more effective than other conventional treatments in tendinopathy,  
30  
31 86 such as iontophoresis, US, Cyriax treatment, etc [9].  
32  
33  
34  
35 87 Physical therapy approaches for CPT continue to evolve and a number of innovative  
36  
37 88 treatment options are now available, such as dry needling (DN) [10], electrotherapeutic  
38  
39 89 invasive modalities (e.g. electrolysis) [11-13] and extracorporeal shockwave (ECSW)  
40  
41 90 therapy [14]. Recently, research has focused on regenerative therapies with high  
42  
43 91 expectations of success because many of these techniques achieve a rapid regeneration of  
44  
45 92 the injured tendon. However, evidence-based regenerative therapies are limited and there  
46  
47 93 is no agreement to date regarding which of these is the most effective [15]. Dry needling  
48  
49 94 consists of the insertion of a needle (filiform and solid, non-beveled) with the aim of  
50  
51 95 provoking a local injury leading to an inflammatory response and the subsequent  
52  
53 96 regeneration of the injured area in approximately one week. A study performed by Abat  
54  
55 97 et al. reported that DN induced histological and mechanical changes in rat Achilles  
56  
57  
58  
59  
60

1  
2  
3 98 tendons at week one, with changes persisting at week four <sup>[16]</sup>. Percutaneous Needle  
4  
5 99 Electrolysis (PNE) is an ultrasound guided technique used by physiotherapists consisting  
6  
7  
8 100 of causing localized lysis in the damaged and/or degenerated tissue by means of a  
9  
10 101 galvanic current transmitted through an acupuncture needle. This technique may affect  
11  
12 102 inflammatory mediators in damaged muscle tissue and influence the new vascularization  
13  
14 103 of the injured area in rats <sup>[16]</sup>. James et al.<sup>[10]</sup> carried out a cohort study in humans  
15  
16 104 analyzing one group treated with DN and another treated with autologous blood  
17  
18 105 injections. In both cases, they found improvements with regard to the beginning of the  
19  
20 106 treatment, however failed to find differences between them, concluding that both  
21  
22 107 technologies were equally effective. In relation to PNE, a study <sup>[13]</sup> analyzed the treatment  
23  
24 108 effect of electrolysis applied once a week in a group of patients without any control or  
25  
26 109 comparative group, reporting that patients obtained statistically and clinically significant  
27  
28 110 improvements with regard to the baseline measurements. In another study <sup>[17]</sup> this  
29  
30 111 technology was compared with other conventional treatments (US and currents), showing  
31  
32 112 that PNE treatment was more effective than conventional treatment.

33  
34  
35  
36  
37 113 From a biological point of view, it seems reasonable to ascertain that a patient will obtain  
38  
39 114 benefits thanks to the mechanical effects provided by the needle, and that patients may  
40  
41 115 benefit more if the electrolysis effect is added to the mechanical stimuli provided by the  
42  
43 116 needle.

44  
45  
46 117 Therefore, the aim of this study is to know whether invasive techniques has additional  
47  
48 118 effects for the treatment of CPT when compared with only EE, and if the application of  
49  
50 119 PNE provides any additional benefits aside from only performing DN, in the short and  
51  
52 120 long term.

53  
54  
55  
56 121

## 57 58 59 122 **METHODS AND ANALYSIS**



1  
2  
3 123 **Study design**  
4

5 124 The trials is designed as a randomized, controlled, participant, investigator and outcomes  
6  
7 125 assessor blinded, experimental study, whose purpose is to compare three protocols in  
8  
9 126 which different physiotherapy protocols are applied in three intervention groups with  
10  
11 127 CRT patients. Randomization will be performed as block randomization with a 1:1  
12  
13 128 allocation.  
14  
15

16  
17 129 This protocol follows the standards of the Helsinki Convention of good clinical practices.  
18  
19 130 The Ethics Committee of Aragon (CEICA) has evaluated the project and has given its  
20  
21 131 favorable opinion and support, N° PI15/0017 (Appendix A).  
22

23  
24 132 The study has been carried out following the SPIRIT statement for clinical trial protocol  
25  
26 133 and a SPIRIT Checklist has been included (Appendix D).  
27

28 134

29  
30 135 **Studying sitting**  
31

32 136 After reviewing the literature and observing the high incidence of this pathology in young  
33  
34 137 adults who perform sports and more specifically, jump sports, the search of patients has  
35  
36 138 been carry out in sports clubs of basketball, football, volleyball, CrossFit, handball,  
37  
38 139 running clubs and some gyms in the city. It is decided to carry out the study in X, where  
39  
40 140 the university is located as well as the laboratory that will be made use for assessments  
41  
42 141 and treatments.  
43  
44

45  
46 142 The assessments will be conducted at the Motion Analysis laboratory of X, and the  
47  
48 143 treatment will be performed at two different sites depending on the availability both of  
49  
50 144 spaces and of schedules, albeit the same material shall always be used.  
51

52 145

53  
54  
55 146 **Participants**  
56

57 147 *Inclusion criteria*  
58  
59  
60

1  
2  
3 148 Participants eligible for inclusion in this study must meet the following criteria: 1. History  
4  
5 149 of CPT and pain at the level of the patellar tendon for over three months; 2. Aged between  
6  
7 150 18 and 45 years; 3. Palpation tenderness of the patellar tendon; 4. A score below 80 on  
8  
9 151 the VISA-P questionnaire.

#### 152 *Exclusion criteria*

153 Exclusion criteria for the study are: 1. Knee surgery within the previous six months; 2.  
154 Chronic joint diseases; 3. Injection with corticosteroids within the previous three months;  
155 4. Contraindications for needling; 5. Use of drugs 48 hours previously (e.g. NSAIDs).

156

#### 157 **Methodology**

158 In the first session, all participants will be instructed how to perform a daily home  
159 program of EE. This will consist of performing three sets of 15 single leg squat repetitions  
160 on a decline board every day, according to Alfredson's protocol [18].

161 For the interventions, the participants will be placed in a supine position with a pillow  
162 under the knee (approximately 20° of knee flexion). The area will be cleansed with an  
163 antiseptic solution (70% Propan-2-ol, Skin-des). An ultrasound probe cover will be used  
164 during the intervention for infectious control. To determine the relevant treatment area,  
165 two factors will be considered: 1) Palpation of the areas exhibiting higher sensitivity and  
166 that reproduce the patient's symptoms; 2) Tendon areas showing degenerative changes  
167 assessed under ultrasound. Each group will receive a total of four sessions distributed  
168 throughout eight weeks of treatment, once every two weeks.

#### 169 *G-DN and G-PNE*

170 Specific DN needles will be used during needling treatments, (Agu-punt, Spain).  
171 Considering the thickness of the tendon and the approach, we shall use needles measuring  
172 0.25 x 25 mm. The procedure will be guided by US to ensure the specificity of application

1  
2  
3 173 on the injured area and to guarantee that the procedure is safe for the patient. The DN  
4  
5 174 needle shall reach the relevant treatment area (areas with degenerative CPT changes).  
6  
7  
8 175 Each session will consist of three needle insertions lasting three seconds each. In G-PNE  
9  
10 176 applications, an intensity of 3 mA galvanic current will be used during the three seconds  
11  
12 177 that the procedure lasts. The dose of 3 mA has demonstrated to be effective in the  
13  
14 178 treatment of tendinopathy injuries in animal models <sup>[12]</sup>.

16  
17 179 *GC*

18  
19 180 A sham needle will be placed upon the treatment zone, simulating the same procedure as  
20  
21 181 the rest of participants enrolled in the other groups. The needle will be placed in a specific  
22  
23 182 holder and will be manipulated during the intervention to simulate a real treatment. This  
24  
25 183 holder will have a cover over the bottom part of the same in order to avoid the needle  
26  
27 184 contacting the skin.

28  
29  
30  
31 185

## 32 33 186 **Outcomes**

### 34 35 187 *Baseline data*

36  
37 188 Baseline data will include gender, age, height, weight, body-mass index, affected side,  
38  
39 189 level, sports and frequency of physical activity, duration of symptoms, medication and  
40  
41 190 infiltrations. A blinded observer will assess all participants at baseline, 10 weeks and 22  
42  
43 191 weeks after baseline.

### 44 45 192 *Primary outcome measure*

46  
47 193 Participants will complete the VISA-P questionnaire at baseline. The VISA-P  
48  
49 194 questionnaire is designed to measure the severity of CPT. VISA-P score is the primary  
50  
51 195 outcome variable. This scale consists of eight questions, the first six questions of which  
52  
53 196 employ an analogical visual scale in order to assign a score of 0 to 10, where 10 represents  
54  
55 197 the optimum state, for the purpose of quantifying pain and function in different activities,  
56  
57  
58  
59  
60

1  
2  
3 198 whereas the last two questions assess the level of functionality and ability to perform  
4  
5 199 physical activity.

6  
7  
8 200 *Secondary outcome measure*

9  
10 201 At the first evaluation, participants will complete the Visual Analogical Scale (VAS),  
11  
12 202 considering the level of pain they feel while practicing their sport's activity. Participants  
13  
14 203 will be explained that a score of 0 indicates the absence of pain whereas a score of 10  
15  
16 204 represents the maximum tolerable pain. They will also complete a questionnaire to assess  
17  
18 205 their quality of life (SF-36) [19].

19  
20  
21 206 In order to assess tendon structure, a US evaluation using ultrasound equipment (Logic  
22  
23 207 S7 Expert, General Electric Healthcare) and a linear probe (MLG-15 5–10 MHz) will be  
24  
25 208 used. The ultrasonographic assessment protocol will be carried out according to the  
26  
27 209 Musculoskeletal Ultrasound Technical Guidelines: Knee, defined by the European  
28  
29 210 Society of Musculoskeletal Radiology [20]. The ultrasonographic assessment will consist  
30  
31 211 of a longitudinal sequence from the tendon origin to the insertion and transverse sections  
32  
33 212 on the pole of the patella, the tendon body and its insertion on the tibial tuberosity, with  
34  
35 213 the subject in supine position, with 20° knee flexion, and a pillow under the knee. The  
36  
37 214 presence of degenerative signs compatible with the medical diagnosis of CPT (thickness  
38  
39 215 of the tendon, hypoechoic areas, irregularities affecting the cortical bone, calcifications)  
40  
41 216 that could be relevant for the selection of the target area will also be assessed. In addition,  
42  
43 217 CD-US assessment will be carried out to detect the presence of hypervascularization, with  
44  
45 218 the subject in supine position and with the knee relaxed in full extension, in order to obtain  
46  
47 219 further information to specifically define the target area.

48  
49 220 Upon completion of the evaluation, a jump test will be carried out, measured with a force  
50  
51 221 platform (FP4060-10-2000, Bertec Corporation). In this evaluation, subjects will perform  
52  
53 222 three different jumps on the platform to analyze the maximum height of the jump, the  
54  
55  
56  
57  
58  
59  
60

1  
2  
3 223 eccentric power and the maximum concentric force performed. The protocol followed is  
4  
5 224 described in the Table A.  
6  
7  
8  
9

225

### 226 **Participant timeline**

11  
12 227 The study design will be a double-blind randomized controlled trial. The flow chart of  
13  
14 228 the trial is shown in Figure A.  
15  
16

229

### 230 **Sample size**

21  
22 231 Regarding the sample size, a calculation of statistical power was made prior to the study.  
23  
24 232 Accepting an alpha risk of 0.05 and a beta risk in a bilateral contrast, 17 subjects are  
25  
26 233 needed in every treatment group to detect a difference equal or superior to 15 points on  
27  
28 234 the Visa-P scale <sup>[21]</sup>, and assuming a standard deviation of 13.2 <sup>[22]</sup>. The estimated rate of  
29  
30 235 loss to follow-up is 20%.

32  
33 236 Recruitment of subjects for the trial will take place between October 2018 and March  
34  
35 237 2020 and will be carried out by means of informative campaigns targeted at different  
36  
37 238 Sports Clubs and Federations by means of e-mail and advertisements in the different  
38  
39 239 University mass media.

41  
42 240 The interested subjects will receive an e-mail explaining the inclusion and exclusion  
43  
44 241 criteria, as well as the purpose of the study. If they meet the defined criteria, they will be  
45  
46 242 invited to send us their medical diagnosis.  
47  
48

243

### 244 **Recruitment**

51  
52  
53 245 Participants will be recruited in sports clubs by the physiotherapist or the coach. There  
54  
55  
56 246 have been conversations with various traumatologists, so that when they make a diagnosis  
57  
58  
59  
60

1  
2  
3 247 in their examination room of this pathology they can refer us to the patients and begin to  
4  
5 248 be part of the study.  
6  
7  
8 249

9  
10 250 **Allocation**

11  
12 251 Participants will be randomly assigned to either GC or G-DN or G-PNE with a 1:1:1  
13  
14 252 allocation through opaque envelope.

15  
16 253 Sealed opaque randomization envelopes with a study-specific participant number will be  
17  
18 254 supplied by an external statistician. A colleague not involved in the research study will  
19  
20 255 take the sealed opaque numbered envelopes in order, by number, and deliver the correct  
21  
22 256 envelope to the treating physical therapist. The envelope will contain a piece of paper,  
23  
24 257 which will be labelled with the same participant specific number, plus the group  
25  
26 258 assignment (G-PNE, G-DN or GC).

27  
28 259 Participants who fulfill the inclusion criteria will receive the standardized oral and written  
29  
30 260 information, and, once they grant their consent to take part in the trial, they will be  
31  
32 261 randomized into either a combined intervention with electrolysis along with EE (G-PNE),  
33  
34 262 a DN intervention combined with EE (G-DN) or sham needling with EE (GC).  
35  
36  
37  
38  
39

40 263

41  
42 264 **Blinding**

43  
44 265 Assessments regarding clinical recovery will be conducted by an assessor blind to  
45  
46 266 treatment allocation. Due to the nature of the intervention, participants can be blinded to  
47  
48 267 allocation. To the other hand, the physiotherapist that do the intervention cannot be  
49  
50 268 blinded, but are strongly inculcated not to disclose the allocation status of the participant  
51  
52 269 at the follow up assessments. An employee outside the research team will feed data into  
53  
54 270 the computer in separate datasheets so that the researchers can analyse data without  
55  
56 271 having access to information about the allocation.  
57  
58  
59  
60

272

**273 Data collection methods**

274 For the data collection of the participants, an oral questionnaire is carried out in which  
275 questions are asked to collect baseline data and about the pathology. Appendix B.  
276 Different questionnaires and assessment scales (VISA-p, VAS, SF-36) in Spanish  
277 version will be given to the participant when they go to the evaluation in paper and all  
278 the time necessary to complete them will be left. Appendix C.

279

**280 Data management and statistical analysis**

281 In this study, all data will be entered electronically in the assessment room.  
282 Originals scales and questionnaires will be entered and kept on file at the participating  
283 site locked.  
284 Participant files are to be stored in numerical order and stored in a secure and accessible  
285 place and manner. Participant files will be maintained in storage for a period of 2 years  
286 after completion of the study.  
287 The statistical analysis will be carried out by an intention-to-treat analysis. Variables will  
288 be described in number (percentage) and average (standard deviation) or median  
289 (interquartile range) attending to their distribution. Quantitative variables will be  
290 analyzed with the Shapiro Wilk test in order to confirm their distribution and to determine  
291 correct statistical tests according to these results.  
292 Outcomes will be analyzed using mixed linear and logistic regression models considering  
293 participants as a random effect and group of treatment as fixed factors. Baseline  
294 characteristics will be introduced in the model as covariance. Numbers needed to treat  
295 index will also be calculated. The primary aim of the analysis will be to calculate the  
296 difference obtained in the Visa-P score after the intervention (final measurement - initial

1  
2  
3 297 measurement). Finally, the magnitude of the effect of the result shall be calculated and  
4  
5 298 therefore its clinical importance, by means of the following formula:  
6

7  
8 299 
$$r = \sqrt{\frac{F(1,dfR)}{F(1,dfR) + dfR}}$$
  
9

10 300 The significance level set for all the analysis will be  $p \leq 0.05$ .  
11  
12

13 301

## 14 302 **ETHICS AND DISEMINATION**

15  
16  
17 303 The study design, procedures and informed consent procedure were approved and  
18  
19 304 consequently the study will be carried out in compliance with the Helsinki Declaration of  
20  
21 305 Human Rights. All participants will have to provide written Spanish informed consent.  
22  
23

24 306 Appendix A.  
25

26  
27 307 The trial's results will be published in peer-reviewed international journals or otherwise  
28  
29 308 made publicly available and will be presented at national and international conferences  
30  
31 309 and symposiums irrespective of the outcomes.  
32

33  
34 310 Any modifications to the protocol, which may impact on the conduct of the study,  
35  
36 311 potential benefit of the patient or may affect patient safety, including changes of study  
37  
38 312 objectives, study design, patient population, sample sizes, study procedures, or significant  
39  
40 313 administrative aspects will require a formal amendment to the protocol. Such amendment  
41  
42 314 will be approved by the Ethics Committee prior to implementation and notified to the  
43  
44 315 health authorities in accordance with local regulations.  
45  
46

47 316 All study-related information will be stored securely at the study site. All participant  
48  
49 317 information will be stored in locked file cabinets in areas with limited access. All records  
50  
51 318 that contain names or other personal identifiers, such as locator forms and informed  
52  
53 319 consent forms, will be stored identified by code number. All local databases will be  
54  
55 320 secured with password-protected access systems.  
56  
57  
58  
59  
60



1  
2  
3 321 **Availability of data and material:** The datasets used and/or analysed during the current  
4  
5 322 study are available from the corresponding author on reasonable request.  
6  
7  
8 323

9  
10 324 **DISCUSSION**

11  
12 325 The study expects to investigate the effects of physiotherapy punction techniques on pain,  
13  
14 326 functionality and quality of life in CPT.

15  
16  
17 327 CPT is a common cause of knee pain in which there is a degenerative disease of the  
18  
19 328 patellar tendon. Among the causes of CPT, extrinsic factors (eg, patellar tendon loading  
20  
21 329 with exercise) and intrinsic factors (eg, malalignment, high patella, imbalances) have  
22  
23  
24 330 been proposed.<sup>[23]</sup> Traditionally the focus has been on strengthening through EE of the  
25  
26 331 quadriceps and many reviews have shown that the effect of the treatment could be  
27  
28 332 estimated to give the patients a 50-70% change of improvement on pain and  
29  
30  
31 333 functionality.<sup>[6,24,25]</sup>

32  
33 334 With regard with punction treatment, previous studies have shown a great improvement  
34  
35 335 in CPT using PNE in combination with EE and all patients of these studies report an  
36  
37 336 improvement after at least one month of treatment.<sup>[11-13,16,17]</sup> This time is less than the  
38  
39  
40 337 minimum three months needed to improve symptoms by applying other conventional  
41  
42 338 techniques (pharmacological and biological treatments, cold/heat techniques, shock  
43  
44 339 waves, etc.) Additionally, in a long-term study, in 2013, it could demonstrated that  
45  
46 340 improve symptoms quickly and steadily for at least 10 years <sup>[16]</sup>. This fact demonstrates  
47  
48 341 that this technique ensures that patients remain pain-free for a long period. Furthermore,  
49  
50 342 only 5 articles<sup>[11-13,16,17]</sup> addressed the application of PNE for the recovery of CPT have  
51  
52  
53 343 been found, but none of the articles studied were RCTs, which entail limited evidence of  
54  
55  
56 344 the effectiveness of this technique.  
57  
58  
59  
60

1  
2  
3 345 On the other hand, there are no standardized protocols for the application of PNE, which  
4  
5 346 explains the great variability in the number of sessions and application time according to  
6  
7 347 the literature. Therefore, this study aims to facilitate clinical practice and combine criteria  
8  
9 348 of methodology to use this technique with a promising future.

10  
11  
12 349 Regarding DN, the literature shows many similarities with the PNE, since there is only  
13  
14 350 one RCT that compares the improvement of functionality with patients who have received  
15  
16 351 PRP. In this study, it was reflected that at short term PRP had better results at pain and  
17  
18 352 functionality, however, DN was more effective than PRP after 6 months.<sup>[26]</sup>

19  
20  
21 353 In these two puncture techniques US is usually used to be able to observe in the first  
22  
23 354 instance how the tendon is presented, and later to be able to observe the needle and be  
24  
25 355 much more specific in the treatment. However, the US has disadvantages include its  
26  
27 356 operator dependence and the limited ability to rule out intra-articular disease with this  
28  
29 357 modality. The sensitivity and specificity of ultrasonography for patellar tendinopathy are  
30  
31 358 58% and 94%, respectively.<sup>[27]</sup>

32  
33  
34  
35 359 There are several highlights to this study. First, we are going to evaluate two techniques  
36  
37 360 that do not have strong evidence yet, contributing in this way with new knowledge in the  
38  
39 361 field of the recovery of musculoskeletal injuries. Second, the role of invasive techniques  
40  
41 362 will be determinate by comparing the effects between these techniques and a control  
42  
43 363 group, being able to obtain reliable data since patients, like the assessor will be blinded.  
44  
45 364 Third, a sub-analysis with US will be performed to investigate changes in presence of  
46  
47 365 calcifications, cortical irregularities, neovascularization, thickness, eco-intensity, eco-  
48  
49 366 variation and eco-texture of the patellar tendon.

50  
51  
52  
53 367 These findings could be a breakthrough for the treatment of this injury as they would  
54  
55 368 allow to define the most effective treatment protocol to deal with this disease and avoid  
56  
57  
58  
59  
60

1  
2  
3 369 the consequences that derive from it, reflecting all of this in a new relapse prevention and  
4  
5 370 the potential impact on the musculoskeletal system.  
6  
7  
8 371

9  
10 372 **REFERENCES**

- 11  
12 373 1. Knobloch K. The role of tendon microcirculation in Achilles and patellar  
13  
14 374 tendinopathy. *Journal of orthopaedic surgery and research*. 2008;3:18. Doi:  
15  
16 375 10.1186/1749-799X-3-18.  
17  
18  
19 376 2. Zwerver J, Bredeweg SW, van den Akker-Scheek I. Prevalence of Jumper's Knee  
20  
21 377 Among Nonelite Athletes From Different Sports A Cross-Sectional Survey. *American*  
22  
23 378 *Journal of Sports Medicine*. 2011;39(9):1984-8. Doi: 10.1177/0363546511413370.  
24  
25  
26 379 3. Hoksrud A, Oehberg L, Alfredson H, Bahr R. Ultrasound-guided sclerosis of  
27  
28 380 neovessels in painful chronic patellar tendinopathy: a randomized controlled trial.  
29  
30 381 *American Journal of Sports Medicine*. 2006;34:1738. Doi:  
31  
32 382 10.1177/0363546511415225.  
33  
34  
35 383 4. Taylor DW, Petrera M, Hendry M, Theodoropoulos JS. A Systematic Review of the  
36  
37 384 Use of Platelet-Rich Plasma in Sports Medicine as a New Treatment for Tendon and  
38  
39 385 Ligament Injuries. *Clinical Journal of Sport Medicine*. 2011;21(4):344-52. Doi:  
40  
41 386 10.1097/JSM.0b013e31821d0f65.  
42  
43  
44 387 5. Andres BM, Murrell GAC. Treatment of tendinopathy: What works, what does not,  
45  
46 388 and what is on the horizon. *Clinical Orthopaedics and Related Research*.  
47  
48 389 2008;466(7):1539-54. Doi: 10.1007/s11999-008-0260-1.  
49  
50  
51 390 6. Larsson MEH, Kall I, Nilsson-Helander K. Treatment of patellar tendinopathy-a  
52  
53 391 systematic review of randomized controlled trials. *Knee Surgery Sports*  
54  
55 392 *Traumatology Arthroscopy*. 2012;20(8):1632-46. Doi: 10.1007/s00167-011-1825-1.  
56  
57  
58  
59  
60

- 1  
2  
3 393 7. Murtaugh B, Ihm JM. Eccentric Training for the Treatment of Tendinopathies.  
4  
5 394 Current Sports Medicine Reports. 2013;12(3):175-82. Doi:  
6  
7 395 10.1249/JSR.0b013e3182933761.  
8  
9  
10 396 8. Young MA, Cook JL, Purdam CR, Kiss ZS, Alfredson H. Eccentric decline squat  
11  
12 397 protocol offers superior results at 12 months compared with traditional eccentric  
13  
14 398 protocol for patellar tendinopathy in volleyball players. British Journal of Sports  
15  
16 399 Medicine. 2005;39(2):102-5. Doi: 10.1136/bjism.2003.010587.  
17  
18  
19 400 9. Ortega-Castillo M, Medina-Porqueres I. Effectiveness of the eccentric exercise  
20  
21 401 therapy in physically active adults with symptomatic shoulder impingement or  
22  
23 402 lateral epicondylar tendinopathy: A systematic review. J Sci Med Sport.  
24  
25 403 2016;19(6):438-53. Doi: 10.1136/bjsports-2016-096794.  
26  
27  
28 404 10. James SLJ, Ali K, Pocock C, Robertson C, Walter J, Bell J, et al. Ultrasound guided  
29  
30 405 dry needling and autologous blood injection for patellar tendinosis. British Journal of  
31  
32 406 Sports Medicine. 2007;41(8):518-21. Doi: 10.1136/bjism.2006.034686.  
33  
34  
35 407 11. Abat F DW, Gelber PE, Polidori F, Monllau JC, Sanchez-Ibañez JM. Effectiveness  
36  
37 408 of the Intratissue Percutaneous Electrolysis (EPI®) technique and isoinertial eccentric  
38  
39 409 exercise in the treatment of patellar tendinopathy at two years follow-up. Muscles  
40  
41 410 Ligaments Tendons J. 2014;14(4):188-93.  
42  
43  
44 411 12. Valera Garrido F, Minaya Muñoz F, JM SI. Effectiveness of electrolysis percutaneous  
45  
46 412 intratissular (EPI®) in chronic insertional patellar tendinopathy. Trauma Fund  
47  
48 413 MAPFRE. 2010;21(4):227-36.  
49  
50  
51 414 13. Sánchez-Ibañez J, Alves R, Polidori F, Valera F, Minaya F, Valles-Martí S, et al.  
52  
53 415 Effectiveness of ultrasound-guided percutaneous electrolysis intratendon (EPI) in the  
54  
55 416 treatment of insertional patellar tendinopathy in soccer players. Br J Sports Med.  
56  
57 417 2013;47(e2).

- 1  
2  
3 418 14. Zwerver J, Verhagen E, Hartgens F, van den Akker-Scheek I, Diercks RL. The  
4  
5 419 TOPGAME-study: effectiveness of extracorporeal shockwave therapy in jumping  
6  
7 420 athletes with patellar tendinopathy. Design of a randomised controlled trial. *Bmc*  
8  
9 421 *Musculoskeletal Disorders*. 2010;11:6. Doi: 10.1186/1471-2474-11-28.  
10  
11  
12 422 15. Krey D, Borchers J, McCamey K. Tendon needling for treatment of tendinopathy: A  
13  
14 423 systematic review. *Physician and Sportsmedicine*. 2015;43(1):80-6. Doi:  
15  
16 424 10.1080/00913847.2015.1004296.  
17  
18  
19 425 16. Abat F, Valles S-L, Gelber P-E, Polidori F, Jorda A, Garcia-Herreros S, et al. An  
20  
21 426 experimental study of muscular injury repair in a mouse model of notexin-induced  
22  
23 427 lesion with EPI technique. *BMC sports science, medicine and rehabilitation*.  
24  
25 428 2015;7:7-. Doi: 10.1007/s00167-014-2855-2.  
26  
27  
28 429 17. Sánchez Sánchez J. Estudio comparativo de un tratamiento fisioterápico convencional  
29  
30 430 con uno que incluye la técnica de electrolisis percutánea intratisular en pacientes con  
31  
32 431 tendinopatía crónica del tendón rotuliano [dissertation]. Salamanca; 2011.  
33  
34  
35 432 18. Alfredson H, Pietila T, Jonsson P, Lorentzon P. Heavy-load eccentric calf muscle  
36  
37 433 training for the treatment of chronic Achilles tendinosis. *American Journal of Sports*  
38  
39 434 *Medicine*. 1998;26(3):360-6. Doi: 10.1177/03635465980260030301.  
40  
41  
42 435 19. Alonso J, Prieto L, Anto JM. The spanish version of the SF-36 health survey- A  
43  
44 436 measure of clinical outcomes. *Medicina Clinica*. 1995;104(20):771-6.  
45  
46  
47 437 20. Martinoli C. Musculoskeletal ultrasound: technical guidelines. *Insights into imaging*.  
48  
49 438 2010;1(3):99-141.  
50  
51  
52 439 21. Stasinopoulos D, Stasinopoulos L. Comparison of effects of exercise programme,  
53  
54 440 pulsed ultrasound and transverse friction in the treatment of chronic patellar  
55  
56 441 tendinopathy. *Clinical Rehabilitation*. 2004;18(4):347-52. Doi:  
57  
58 442 10.1191/0269215504cr757oa.  
59  
60

- 1  
2  
3 443 22. Hernandez-Sanchez S, Hidalgo MD, Gomez A. Cross-cultural Adaptation of VISA-  
4  
5 444 P Score for Patellar Tendinopathy in Spanish Population. *Journal of Orthopaedic &*  
6  
7 445 *Sports Physical Therapy*. 2011;41(8):581-91. 10.2519/jospt.2011.3613.  
8  
9  
10 446 23. Figueroa D, Figueroa F, Calvo R. Patellar tendinopathy: diagnosis and treatment. *J*  
11  
12 447 *Am Acad Orthop Surg*. 2016 Dec;24(12):e184-92. Doi: 10.5435/JAAOS-D-15-  
13  
14 448 00703.  
15  
16  
17 449 24. Lian OB, Engebretsen L, Bahr R (2005) Prevalence of jumper's knee among elite  
18  
19 450 athletes from different sports: a cross-sectional study. *Am J Sport Med* 33:561–567.  
20  
21 451 Doi: 10.1177/0363546504270454.  
22  
23  
24 452 25. Visnes H, Bahr R. The evolution of eccentric training as treatment for patellar  
25  
26 453 tendinopathy (jumper's knee): a critical review of exercise programmes. *Br J Sports*  
27  
28 454 *Med*. 2007 Apr;41(4):217-23. Doi: 10.1136/bjism.2006.032417.  
29  
30  
31 455 26. Dragoo JL, Wasterlain AS, Braun HJ, Nead KT. Platelet-Rich Plasma as a Treatment  
32  
33 456 for Patellar Tendinopathy A Double-Blind, Randomized Controlled Trial. *American*  
34  
35 457 *Journal of Sports Medicine*. 2014;42(3):610-8. Doi: 10.1177/0363546513518416.  
36  
37  
38 458 27. Warden SJ, Brukner P: Patellar tendinopathy. *Clin Sports Med* 2003;22(4):743-759.  
39

40 459

#### 41 460 **AUTHOR'S CONTRIBUTIONS**

42  
43  
44 461 MPL, EMG and PH conceived of the idea, and developed the intervention. MPL and PH  
45  
46 462 wrote the article. MPL, MO, RMG, AVB, ZA, YH and PH developed the design of the  
47  
48 463 trial. MO were involved in development of the statistical analysis of the trial and  
49  
50 464 contributed to the content of the article. AVB contributed to the design and writing of the  
51  
52 465 jump test protocol. All authors have read and approved the final manuscript.  
53  
54  
55

56 466

#### 57 467 **FUNDING STATEMENT**

58  
59  
60

1  
2  
3 468 This research received no specific grant from any funding agency in the public,  
4  
5 469 commercial or not-for-profit sectors.  
6  
7  
8 470

9  
10 471 **COMPETING INTEREST STATEMENT**  
11

12 472 The authors declare that they have no competing interests.  
13  
14  
15 473

16  
17 474 **WORD COUNT:** 3431 words.  
18  
19  
20 475

21  
22 476

23  
24 477

25  
26 478

27  
28 479

29  
30 480

31  
32 481

33  
34 482

35  
36 483

37  
38 484

39  
40 485

41  
42 486

43  
44 487

45  
46 488

47  
48 489

49  
50 490

51  
52 491

53  
54 492

55  
56 491

57  
58 492

59  
60

493 **TABLES**

494 Table A. Jump test protocol.

495

496

497

498

499

500

501

502

503

504

505

506

507

508

509 **FIGURES**

510 Figure A. Flow diagram. Randomized controlled trial design.

| <b>JUMP TEST PROTOCOL</b>                                                                                                                                                                                                                                            |                                                                              |
|----------------------------------------------------------------------------------------------------------------------------------------------------------------------------------------------------------------------------------------------------------------------|------------------------------------------------------------------------------|
| 5-minute warm-up consisting of steady jogging on a treadmill                                                                                                                                                                                                         |                                                                              |
| Dynamic Stretches lasting 5 minutes, as instructed by the physical therapist                                                                                                                                                                                         | Psoas<br>Quadriceps<br>Gluteus maximus<br>Gastrocnemius<br>Hamstring muscles |
| Three jump tests are performed<br><br>- 3 jumps off the ground for 3 times for the patient to become familiar with the tests<br><br>- The subject is placed on the platform and asked to perform each test 3 times, with 60 seconds rest between the different tests | Abalakov test<br>Countermovement jump test<br>Squat jump                     |
| The highest jump is selected for the study                                                                                                                                                                                                                           |                                                                              |

509

510



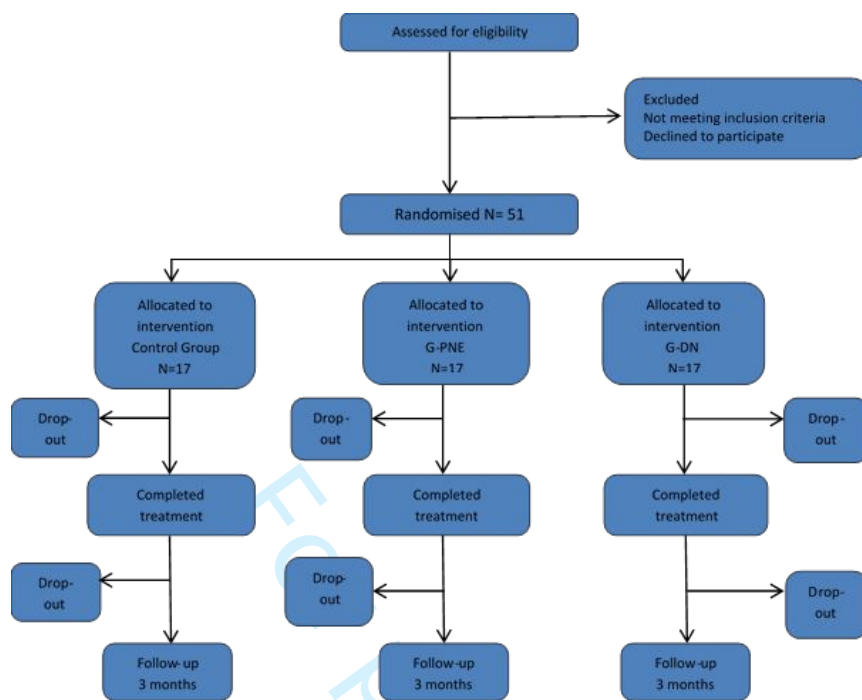

511

512 G-PNE: Percutaneous Needle Electrolysis Group. G-DN: Dry Needle Group.

513

514 Figure B. Schedule of enrolment, interventions, and assessments.

|                                  | Enrolment       | Allocation | Close-out      |                |                |                |
|----------------------------------|-----------------|------------|----------------|----------------|----------------|----------------|
| TIMEPOINT**                      | -t <sub>1</sub> | 0          | t <sub>1</sub> | t <sub>2</sub> | t <sub>3</sub> | t <sub>4</sub> |
| <b>ENROLMENT:</b>                |                 |            |                |                |                |                |
| Eligibility screen               | X               |            |                |                |                |                |
| Informed consent                 | X               |            |                |                |                |                |
| Allocation                       |                 | X          |                |                |                |                |
| <b>INTERVENTIONS:</b>            |                 |            |                |                |                |                |
| Control group                    |                 |            | ↔              |                |                |                |
| G-PNE                            |                 |            | ↔              |                |                |                |
| G-DN                             |                 |            | ↔              |                |                |                |
| <b>ASSESSMENTS:</b>              |                 |            |                |                |                |                |
| Baseline demographic information | X               |            |                |                |                |                |

|                            |   |  |   |  |   |   |
|----------------------------|---|--|---|--|---|---|
| <i>VISA-P</i>              | X |  | X |  | X | X |
| <i>VAS</i>                 |   |  | X |  | X | X |
| <i>SF-36</i>               |   |  | X |  | X | X |
| <i>Tendon structure US</i> |   |  | X |  | X | X |
| <i>Jump test</i>           |   |  | X |  | X | X |

515

516 Schedule for enrolment and intervention per cluster. -t1: baseline; t1-t2: intervention period;

517 t2: 8 weeks after baseline; t3: 10 weeks after baseline; t4: 3 month after baseline. G-PNE:

518 Percutaneous Needle Electrolysis Group; G-DN: Dry Needle Group; US: ultrasound.

519

520 **Appendix A. Informed Consent.**521 **DOCUMENTO DE INFORMACIÓN AL PACIENTE**

522

523 **Fecha:**524 **Título del proyecto: “ESTUDIO COMPARATIVO ENTRE 3 TÉCNICAS DE PUNCIÓN PARA**  
525 **EL TRATAMIENTO DE LA TENDINOPATÍA CRÓNICA DEL TENDÓN ROTULIANO”**526 **Investigador principal:**527 Doña: M<sup>a</sup> Pilar López Royo

528

529 Este estudio se basa en el estudio comparativo de tres tratamientos que utilizan distintas  
530 técnicas de fisioterapia invasiva junto con un programa de ejercicio excéntrico para el  
531 tratamiento de la tendinopatía rotuliana. Por medio del tratamiento se produce una  
532 disminución del dolor asociado a esta patología y un aumento de la fuerza de la pierna,  
533 lo que a su vez hace que mejore la funcionalidad en las actividades de la vida diaria y  
534 mejore la calidad de vida.

535

536 **PROCESO DE SELECCIÓN DE PACIENTES**537 **Criterios de inclusión:**

538 - Edad comprendida entre 18 y 40 años.

- 1  
2  
3 539 - Practicar cualquier deporte de forma habitual.  
4  
5 540 - Pacientes con diagnóstico médico de tendinopatía rotuliana crónica con un  
6 541 mínimo de 3 meses de evolución y con sintomatología.  
7  
8 542 - Dolor a la palpación del tendón en el polo inferior de la rótula y durante el  
9 543 entrenamiento o competición.  
10  
11 544 - Puntuación del cuestionario VISA-P menor de 80 (el resultado obtenido de  
12 545 rellenar el cuestionario tiene que ser menor de 80 puntos de los 100 posibles  
13 546 para poder participar en el estudio).  
14  
15  
16 547

17  
18 548 Criterios de exclusión:

- 19  
20  
21 549 - Paciente operado de la rodilla afectada en los últimos 6 meses.  
22 550 - Infiltraciones en la rodilla afectada en los últimos 3 meses.  
23  
24 551 - Paciente que ha recibido tratamiento farmacológico o fisioterápico en las últimas  
25 552 48 horas o durante el estudio.  
26  
27 553 - Patología con menos de 3 meses de evolución.  
28 554 - Presentar tendinopatía rotuliana bilateral.  
29  
30 555 - Puntuación del cuestionario VISA-p mayor o igual de 80 (el resultado obtenido  
31 556 de rellenar el cuestionario no puede ser igual o superar los 80 puntos de los 100  
32 557 posibles, sino no podrá participar en el estudio).  
33  
34 558 - Imposibilidad para aplicar alguna de las técnicas de tratamiento o valoración por  
35 559 contraindicación absoluta o relativa.  
36  
37  
38 560  
39  
40  
41 561

42 562 **PROCEDIMIENTO**

43  
44  
45 563 El tratamiento consiste en realizar un protocolo de ejercicios excéntricos de cuádriceps  
46 564 que realizará en casa de forma diaria, y que serán revisados con el fisioterapeuta para  
47 565 valorar su correcta realización. Se complementará el tratamiento con la aplicación de  
48 566 una técnica de punción según el protocolo de tratamiento propuesto de forma totalmente  
49 567 **aleatorizada** y según los criterios diagnósticos específicos de la misma, siguiendo las  
50 568 indicaciones, criterios de aplicación y criterios diagnósticos.

51  
52  
53  
54  
55 569 Son técnicas de punción cuyo objetivo es producir una respuesta inflamatoria aguda que  
56 570 active los mecanismos fisiológicos de regeneración del tejido y mejorar el dolor y la  
57 571 funcionalidad en la articulación de la rodilla, se realiza con agujas de punción seca,

1  
2  
3 572 similares a las agujas de acupuntura y sin infiltrar ningún tipo de sustancia dentro del  
4 573 organismo.

5  
6  
7 574

8  
9 575 Los registros serán realizados en el Espacio de Valoración Funcional de la Universidad  
10 576 San Jorge, en la Facultad de Ciencias de la Salud, Edificio III. Se pondrá a su disposición  
11 577 la posibilidad de utilizar el autobús que utiliza el personal y alumnado de la universidad  
12 578 (en el horario que éste esté disponible). Las fechas y horarios serán convenidas con  
13 579 cada participante en función de su disponibilidad y la de los investigadores, buscando  
14 580 la conformidad de todos. La duración aproximada del estudio para cada paciente será  
15 581 de 30 minutos, aunque este horario podrá variar en función de los acontecimientos.

16  
17  
18  
19  
20  
21 582

22  
23 583 Será recibido por los miembros del equipo de investigación y una vez allí, se le realizará  
24 584 un primer análisis fisioterápico, rellenará una encuesta, una escala analógica visual  
25 585 (EVA) del dolor y el cuestionario Visa-p en el que se valorará la funcionalidad de la  
26 586 rodilla.

27  
28  
29  
30  
31 587 Tras éste primer registro se le colocará un marcador pasivo en el pantalón. Se le pedirá  
32 588 que realice el siguiente protocolo:

- 33  
34  
35 - Calentamiento de 5 minutos en cinta a ritmo constante.  
36 - Estiramientos dinámicos de psoas, cuádriceps, glúteo, gastrocnemios, isquiotibiales  
37 durante 5 minutos instruidos por el fisioterapeuta.  
38 - Realización de los 3 saltos fuera de la plataforma durante 3 veces para que se  
39 familiarice con los tests.  
40 - En la plataforma de fuerzas realizará 3 test de salto: el test de Abalakov (ABK), el test  
41 de salto con contramovimiento (CMJ) y el squatjump (SJ).

42  
43 Se colocará en la plataforma y realizará 3 saltos de cada uno de los test con una  
44 separación entre ellos de 60 segundos.

45  
46 Se valora el tendón por ecografía, y se recogen datos por medio de personal adiestrado  
47 y se envía a personal especialista en radiodiagnóstico.

48  
49 589 Tras los registros de los saltos se dará por finalizada la valoración.

50  
51  
52  
53 590

54  
55  
56  
57 591 Tras la 1ª valoración, se realizará una división en tres grupos de los pacientes de forma  
58 592 aleatorizada.

1  
2  
3 593 Se le realizará el protocolo de tratamiento de fisioterapia invasiva que le haya  
4 correspondido. Realizará una sesión del tratamiento cada 14 días, y se realizará la 2º  
5 594 valoración 1 semana más tarde de la 4º sesión de punción para valorar los cambios que  
6 595 se hayan producido tras el tratamiento, repitiéndose de nuevo el proceso de recogida  
7 596 de datos realizado al inicio del estudio. Se realizará un seguimiento a los tres meses de  
8 597 la valoración post-tratamiento para valorar la eficacia de la técnica a largo plazo del  
9 598 tratamiento.  
10 599

11 600 El procedimiento se realizará guiado ecográficamente para asegurar la especificidad de  
12 601 aplicación sobre la zona relevante de tratamiento y garantizar la seguridad de la técnica.  
13 602 Se hace posterior a esta intervención una serie de ejercicios excéntricos de cuádriceps.  
14 603 El tratamiento se realizará durante 4 sesiones (a razón de una sesión cada 14 días).  
15 604

## 605 **RIESGOS**

606 La aplicación de las técnicas de punción utilizadas no han demostrado tener ningún  
607 efecto secundario hasta la fecha, aunque el paciente puede experimentar dolor durante  
608 y tras la punción, generalmente de uno o dos días de duración.  
609

## 610 **RESPONSABILIDADES DEL PARTICIPANTE**

611 La información que usted posea sobre su estado de salud o sobre sensaciones  
612 previas anormales al realizarle una punción, puede afectar la seguridad o el valor de  
613 estas pruebas. La rápida comunicación por su parte de las sensaciones que  
614 experimenta al realizar esta prueba es también de gran importancia. Usted es  
615 responsable de revelar esa información al personal de la prueba cuando se le pregunte.  
616

## 617 **PREGUNTAS**

618 Le animamos a que haga cualquier pregunta sobre los procedimientos seguidos o sus  
619 resultados en la prueba. Si tiene alguna preocupación o pregunta, por favor pídasenos  
620 más información, para ello le dejamos un correo electrónico [mapilr86@hotmail.com](mailto:mapilr86@hotmail.com) y un  
621 número de teléfono móvil: 616102365.  
622

1  
2  
3 623 **LIBERTAD PARA DAR EL CONSENTIMIENTO**  
4

5 624 Usted participa en el estudio de manera voluntaria, pudiendo abandonarlo en el  
6 625 momento que considere oportuno, sin que esto conlleve ninguna repercusión negativa  
7 para usted.  
8  
9 626

10  
11 627 Los datos obtenidos en el estudio serán confidenciales y únicamente se hará uso  
12 de ellos para el cumplimiento de los objetivos planteados en la investigación. No se  
13 628 cederán estos datos a terceros sin el consentimiento expreso de los sujetos  
14 629 participantes a quienes pertenezcan los datos.  
15  
16 630

17  
18 631 En esta investigación se garantizará el anonimato de los sujetos que aportan los  
19 632 datos, estableciendo un código disociado para identificarlos que sólo será conocido por  
20 633 los responsables de la realización del trabajo de campo.  
21  
22

23  
24 634

25  
26 635

27  
28 636

29  
30 637 Fdo: M<sup>a</sup> Pilar López Royo  
31

32 638

33  
34 639

35  
36 640

37  
38 641

39  
40 642

41  
42 643

43  
44 644

45  
46 645

47  
48 646

49  
50 647

51  
52 648

53  
54 649

55  
56 650

57  
58 651  
59  
60

1  
2  
3 652 - **MODELO DE CONSENTIMIENTO INFORMADO**

4 653

5  
6 654

7  
8 655

9  
10 656 **Título del PROYECTO: “ESTUDIO COMPARATIVO ENTRE 3 TÉCNICAS DE PUNCIÓN**  
11 657 **PARA EL TRATAMIENTO DE LA TENDINOPATÍA CRÓNICA DEL TENDÓN ROTULIANO”**

12  
13 658 Doña: M<sup>a</sup> Pilar López Royo ([mapilr86@hotmail.com](mailto:mapilr86@hotmail.com))

14  
15 659 Departamento de Fisiatría y Enfermería

16  
17 660 **UNIVERSIDAD DE ZARAGOZA**

18 661

19  
20 662 **Yo, ..... (nombre y apellidos del participante)**

21  
22 663 He recibido suficiente información en relación con el proyecto, he leído la hoja de  
23 664 información que se me ha entregado y he podido hacer preguntas sobre el proyecto,  
24 665 recibiendo respuestas satisfactorias.

25  
26 666 Entiendo que la participación es voluntaria y que puedo abandonar el proyecto:

27  
28 667 . Cuando lo desee

29  
30 668 . Sin tener que dar explicaciones

31  
32 669 . Sin que esto repercuta en mis cuidados médicos

33  
34 670

35  
36 671 He sido claramente informado de forma clara y precisa del tratado que recibirán mis  
37 672 datos personales que se contienen en este proyecto, sabiendo que los datos serán  
38 673 tratados y custodiados bajo mi intimidad y a la vigente normativa de la protección de  
39 674 datos, y que sobre estos datos me asisten los derechos de rectificación, acceso y  
40 675 oposición comunicándolo al investigador principal que figura en este consentimiento.

41  
42 676

43  
44 677 Declaro que presto libremente mi conformidad para participar en el estudio.

45  
46 678

47  
48 679 Deseo ser informado sobre los resultados del estudio: sí no (marque lo que  
49 680 proceda)

50  
51 681

1  
2  
3 682 Así pues, acepto que las muestras derivadas de este proyecto puedan ser utilizadas en  
4 683 futuras investigaciones siempre y cuando están relacionadas con ésta.

5  
6  
7 684

8  
9 685 Por lo tanto, doy mi conformidad para que mis datos clínicos sean revisados por  
10 686 personal ajeno al centro, para los fines del estudio, y soy consciente de que este  
11 687 consentimiento es revocable.

12  
13  
14  
15 688

16  
17 689

18  
19  
20 Firma del participante:

21  
22 \_\_\_\_\_

23  
24  
25 Fecha:

26  
27 \_\_\_\_\_

28  
29  
30 690

31  
32 691

33  
34 692 He explicado la naturaleza y el propósito del proyecto al paciente mencionado

35  
36  
37  
38  
39 Firma del Investigador:

40  
41 \_\_\_\_\_

42  
43  
44 Fecha:

45  
46 \_\_\_\_\_

47  
48  
49 693

50  
51 694

52  
53 695 Consentimiento informado estudio\_\_\_\_\_

54  
55 696 Versión\_\_\_\_\_, fecha\_\_\_\_\_

56  
57  
58 697

59  
60



1  
2  
3 **1 Appendix D. Checklist SPIRIT**  
4  
5  
6  
7  
8  
9  
10  
11  
12  
13  
14  
15  
16  
17  
18

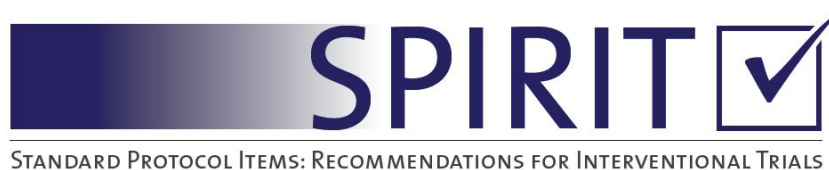

6 SPIRIT 2013 Checklist: Recommended items to address in a clinical trial protocol and  
7 related documents\*

| Section/item                      | Item No | Description                                                                                                                                                                                                                                                                              | Addressed on page number |
|-----------------------------------|---------|------------------------------------------------------------------------------------------------------------------------------------------------------------------------------------------------------------------------------------------------------------------------------------------|--------------------------|
| <b>Administrative information</b> |         |                                                                                                                                                                                                                                                                                          |                          |
| Title                             | 1       | Descriptive title identifying the study design, population, interventions, and, if applicable, trial acronym                                                                                                                                                                             | 1                        |
| Trial registration                | 2a      | Trial identifier and registry name. If not yet registered, name of intended registry                                                                                                                                                                                                     | 1-2                      |
|                                   | 2b      | All items from the World Health Organization Trial Registration Data Set                                                                                                                                                                                                                 | 1-2                      |
| Protocol version                  | 3       | Date and version identifier                                                                                                                                                                                                                                                              | N/A                      |
| Funding                           | 4       | Sources and types of financial, material, and other support                                                                                                                                                                                                                              | 19-20                    |
| Roles and responsibilities        | 5a      | Names, affiliations, and roles of protocol contributors                                                                                                                                                                                                                                  | 19                       |
|                                   | 5b      | Name and contact information for the trial sponsor                                                                                                                                                                                                                                       | 19                       |
|                                   | 5c      | Role of study sponsor and funders, if any, in study design; collection, management, analysis, and interpretation of data; writing of the report; and the decision to submit the report for publication, including whether they will have ultimate authority over any of these activities | N/A                      |
|                                   | 5d      | Composition, roles, and responsibilities of the coordinating centre, steering committee, endpoint adjudication committee, data management team, and other individuals or groups overseeing the trial, if applicable (see Item 21a for data monitoring committee)                         | N/A                      |
| <b>Introduction</b>               |         |                                                                                                                                                                                                                                                                                          |                          |
| Background and rationale          | 6a      | Description of research question and justification for undertaking the trial, including summary of relevant studies (published and unpublished) examining benefits and harms for each intervention                                                                                       | 3-5                      |
|                                   | 6b      | Explanation for choice of comparators                                                                                                                                                                                                                                                    | 3-5                      |
| Objectives                        | 7       | Specific objectives or hypotheses                                                                                                                                                                                                                                                        | 5                        |

|                                                                     |     |                                                                                                                                                                                                                                                                                                                                                                                |       |
|---------------------------------------------------------------------|-----|--------------------------------------------------------------------------------------------------------------------------------------------------------------------------------------------------------------------------------------------------------------------------------------------------------------------------------------------------------------------------------|-------|
| Trial design                                                        | 8   | Description of trial design including type of trial (eg, parallel group, crossover, factorial, single group), allocation ratio, and framework (eg, superiority, equivalence, noninferiority, exploratory)                                                                                                                                                                      | 6     |
| <b>Methods: Participants, interventions, and outcomes</b>           |     |                                                                                                                                                                                                                                                                                                                                                                                |       |
| Study setting                                                       | 9   | Description of study settings (eg, community clinic, academic hospital) and list of countries where data will be collected. Reference to where list of study sites can be obtained                                                                                                                                                                                             | 6     |
| Eligibility criteria                                                | 10  | Inclusion and exclusion criteria for participants. If applicable, eligibility criteria for study centres and individuals who will perform the interventions (eg, surgeons, psychotherapists)                                                                                                                                                                                   | 6-7   |
| Interventions                                                       | 11a | Interventions for each group with sufficient detail to allow replication, including how and when they will be administered                                                                                                                                                                                                                                                     | 7-8   |
|                                                                     | 11b | Criteria for discontinuing or modifying allocated interventions for a given trial participant (eg, drug dose change in response to harms, participant request, or improving/worsening disease)                                                                                                                                                                                 | N/A   |
|                                                                     | 11c | Strategies to improve adherence to intervention protocols, and any procedures for monitoring adherence (eg, drug tablet return, laboratory tests)                                                                                                                                                                                                                              | 8     |
|                                                                     | 11d | Relevant concomitant care and interventions that are permitted or prohibited during the trial                                                                                                                                                                                                                                                                                  | 7-8   |
| Outcomes                                                            | 12  | Primary, secondary, and other outcomes, including the specific measurement variable (eg, systolic blood pressure), analysis metric (eg, change from baseline, final value, time to event), method of aggregation (eg, median, proportion), and time point for each outcome. Explanation of the clinical relevance of chosen efficacy and harm outcomes is strongly recommended | 8-10  |
| Participant timeline                                                | 13  | Time schedule of enrolment, interventions (including any run-ins and washouts), assessments, and visits for participants. A schematic diagram is highly recommended (see Figure)                                                                                                                                                                                               | 10    |
| Sample size                                                         | 14  | Estimated number of participants needed to achieve study objectives and how it was determined, including clinical and statistical assumptions supporting any sample size calculations                                                                                                                                                                                          | 10    |
| Recruitment                                                         | 15  | Strategies for achieving adequate participant enrolment to reach target sample size                                                                                                                                                                                                                                                                                            | 10-11 |
| <b>Methods: Assignment of interventions (for controlled trials)</b> |     |                                                                                                                                                                                                                                                                                                                                                                                |       |
| Allocation:                                                         |     |                                                                                                                                                                                                                                                                                                                                                                                |       |
| Sequence generation                                                 | 16a | Method of generating the allocation sequence (eg, computer-generated random numbers), and list of any factors for stratification. To reduce predictability of a random sequence, details of any planned restriction (eg, blocking) should be provided in a separate document that is unavailable to those who enrol participants or assign interventions                       | 11    |
| Allocation concealment mechanism                                    | 16b | Mechanism of implementing the allocation sequence (eg, central telephone; sequentially numbered, opaque, sealed envelopes), describing any steps to conceal the sequence until interventions are assigned                                                                                                                                                                      | 11    |

|    |                                                           |     |                                                                                                                                                                                                                                                                                                                                                                                                              |       |
|----|-----------------------------------------------------------|-----|--------------------------------------------------------------------------------------------------------------------------------------------------------------------------------------------------------------------------------------------------------------------------------------------------------------------------------------------------------------------------------------------------------------|-------|
| 1  |                                                           |     |                                                                                                                                                                                                                                                                                                                                                                                                              |       |
| 2  |                                                           |     |                                                                                                                                                                                                                                                                                                                                                                                                              |       |
| 3  |                                                           |     |                                                                                                                                                                                                                                                                                                                                                                                                              |       |
| 4  | Implemen                                                  | 16c | Who will generate the allocation sequence, who will enrol participants, and who will assign participants to interventions                                                                                                                                                                                                                                                                                    | 11    |
| 5  | tation                                                    |     |                                                                                                                                                                                                                                                                                                                                                                                                              |       |
| 6  | Blinding                                                  | 17a | Who will be blinded after assignment to interventions (eg, trial participants, care providers, outcome assessors, data analysts), and how                                                                                                                                                                                                                                                                    | 11    |
| 7  | (masking)                                                 |     |                                                                                                                                                                                                                                                                                                                                                                                                              |       |
| 8  |                                                           | 17b | If blinded, circumstances under which unblinding is permissible, and procedure for revealing a participant's allocated intervention during the trial                                                                                                                                                                                                                                                         | 11    |
| 9  |                                                           |     |                                                                                                                                                                                                                                                                                                                                                                                                              |       |
| 10 |                                                           |     |                                                                                                                                                                                                                                                                                                                                                                                                              |       |
| 11 |                                                           |     |                                                                                                                                                                                                                                                                                                                                                                                                              |       |
| 12 |                                                           |     |                                                                                                                                                                                                                                                                                                                                                                                                              |       |
| 13 | <b>Methods: Data collection, management, and analysis</b> |     |                                                                                                                                                                                                                                                                                                                                                                                                              |       |
| 14 |                                                           |     |                                                                                                                                                                                                                                                                                                                                                                                                              |       |
| 15 | Data                                                      | 18a | Plans for assessment and collection of outcome, baseline, and other trial data, including any related processes to promote data quality (eg, duplicate measurements, training of assessors) and a description of study instruments (eg, questionnaires, laboratory tests) along with their reliability and validity, if known. Reference to where data collection forms can be found, if not in the protocol | 12    |
| 16 | collection                                                |     |                                                                                                                                                                                                                                                                                                                                                                                                              |       |
| 17 | methods                                                   |     |                                                                                                                                                                                                                                                                                                                                                                                                              |       |
| 18 |                                                           | 18b | Plans to promote participant retention and complete follow-up, including list of any outcome data to be collected for participants who discontinue or deviate from intervention protocols                                                                                                                                                                                                                    | N/A   |
| 19 |                                                           |     |                                                                                                                                                                                                                                                                                                                                                                                                              |       |
| 20 |                                                           |     |                                                                                                                                                                                                                                                                                                                                                                                                              |       |
| 21 |                                                           |     |                                                                                                                                                                                                                                                                                                                                                                                                              |       |
| 22 |                                                           |     |                                                                                                                                                                                                                                                                                                                                                                                                              |       |
| 23 | Data                                                      | 19  | Plans for data entry, coding, security, and storage, including any related processes to promote data quality (eg, double data entry; range checks for data values). Reference to where details of data management procedures can be found, if not in the protocol                                                                                                                                            | 12    |
| 24 | management                                                |     |                                                                                                                                                                                                                                                                                                                                                                                                              |       |
| 25 |                                                           |     |                                                                                                                                                                                                                                                                                                                                                                                                              |       |
| 26 |                                                           |     |                                                                                                                                                                                                                                                                                                                                                                                                              |       |
| 27 |                                                           |     |                                                                                                                                                                                                                                                                                                                                                                                                              |       |
| 28 |                                                           |     |                                                                                                                                                                                                                                                                                                                                                                                                              |       |
| 29 |                                                           |     |                                                                                                                                                                                                                                                                                                                                                                                                              |       |
| 30 | Statistical                                               | 20a | Statistical methods for analysing primary and secondary outcomes. Reference to where other details of the statistical analysis plan can be found, if not in the protocol                                                                                                                                                                                                                                     | 12    |
| 31 | methods                                                   |     |                                                                                                                                                                                                                                                                                                                                                                                                              |       |
| 32 |                                                           | 20b | Methods for any additional analyses (eg, subgroup and adjusted analyses)                                                                                                                                                                                                                                                                                                                                     | 12-13 |
| 33 |                                                           |     |                                                                                                                                                                                                                                                                                                                                                                                                              |       |
| 34 |                                                           | 20c | Definition of analysis population relating to protocol non-adherence (eg, as randomised analysis), and any statistical methods to handle missing data (eg, multiple imputation)                                                                                                                                                                                                                              | 12-13 |
| 35 |                                                           |     |                                                                                                                                                                                                                                                                                                                                                                                                              |       |
| 36 |                                                           |     |                                                                                                                                                                                                                                                                                                                                                                                                              |       |
| 37 |                                                           |     |                                                                                                                                                                                                                                                                                                                                                                                                              |       |
| 38 |                                                           |     |                                                                                                                                                                                                                                                                                                                                                                                                              |       |
| 39 |                                                           |     |                                                                                                                                                                                                                                                                                                                                                                                                              |       |
| 40 | <b>Methods: Monitoring</b>                                |     |                                                                                                                                                                                                                                                                                                                                                                                                              |       |
| 41 |                                                           |     |                                                                                                                                                                                                                                                                                                                                                                                                              |       |
| 42 | Data                                                      | 21a | Composition of data monitoring committee (DMC); summary of its role and reporting structure; statement of whether it is independent from the sponsor and competing interests; and reference to where further details about its charter can be found, if not in the protocol. Alternatively, an explanation of why a DMC is not needed                                                                        | -     |
| 43 | monitoring                                                |     |                                                                                                                                                                                                                                                                                                                                                                                                              |       |
| 44 |                                                           | 21b | Description of any interim analyses and stopping guidelines, including who will have access to these interim results and make the final decision to terminate the trial                                                                                                                                                                                                                                      | -     |
| 45 |                                                           |     |                                                                                                                                                                                                                                                                                                                                                                                                              |       |
| 46 |                                                           |     |                                                                                                                                                                                                                                                                                                                                                                                                              |       |
| 47 |                                                           |     |                                                                                                                                                                                                                                                                                                                                                                                                              |       |
| 48 |                                                           |     |                                                                                                                                                                                                                                                                                                                                                                                                              |       |
| 49 |                                                           |     |                                                                                                                                                                                                                                                                                                                                                                                                              |       |
| 50 |                                                           |     |                                                                                                                                                                                                                                                                                                                                                                                                              |       |
| 51 | Harms                                                     | 22  | Plans for collecting, assessing, reporting, and managing solicited and spontaneously reported adverse events and other unintended effects of trial interventions or trial conduct                                                                                                                                                                                                                            | -     |
| 52 |                                                           |     |                                                                                                                                                                                                                                                                                                                                                                                                              |       |
| 53 |                                                           |     |                                                                                                                                                                                                                                                                                                                                                                                                              |       |
| 54 |                                                           |     |                                                                                                                                                                                                                                                                                                                                                                                                              |       |
| 55 | Auditing                                                  | 23  | Frequency and procedures for auditing trial conduct, if any, and whether the process will be independent from investigators and the sponsor                                                                                                                                                                                                                                                                  | N/A   |
| 56 |                                                           |     |                                                                                                                                                                                                                                                                                                                                                                                                              |       |
| 57 |                                                           |     |                                                                                                                                                                                                                                                                                                                                                                                                              |       |
| 58 | <b>Ethics and dissemination</b>                           |     |                                                                                                                                                                                                                                                                                                                                                                                                              |       |
| 59 |                                                           |     |                                                                                                                                                                                                                                                                                                                                                                                                              |       |
| 60 |                                                           |     |                                                                                                                                                                                                                                                                                                                                                                                                              |       |

|    |                               |     |                                                                                                                                                                                                                                                                                     |
|----|-------------------------------|-----|-------------------------------------------------------------------------------------------------------------------------------------------------------------------------------------------------------------------------------------------------------------------------------------|
| 1  |                               |     |                                                                                                                                                                                                                                                                                     |
| 2  |                               |     |                                                                                                                                                                                                                                                                                     |
| 3  |                               |     |                                                                                                                                                                                                                                                                                     |
| 4  | Research ethics approval      | 24  | Plans for seeking research ethics committee/institutional review board (REC/IRB) approval                                                                                                                                                                                           |
| 5  |                               |     |                                                                                                                                                                                                                                                                                     |
| 6  |                               |     |                                                                                                                                                                                                                                                                                     |
| 7  | Protocol amendments           | 25  | Plans for communicating important protocol modifications (eg, changes to eligibility criteria, outcomes, analyses) to relevant parties (eg, investigators, REC/IRBs, trial participants, trial registries, journals, regulators)                                                    |
| 8  |                               |     |                                                                                                                                                                                                                                                                                     |
| 9  |                               |     |                                                                                                                                                                                                                                                                                     |
| 10 |                               |     |                                                                                                                                                                                                                                                                                     |
| 11 | Consent or assent             | 26a | Who will obtain informed consent or assent from potential trial participants or authorised surrogates, and how (see Item 32)                                                                                                                                                        |
| 12 |                               |     |                                                                                                                                                                                                                                                                                     |
| 13 |                               | 26b | Additional consent provisions for collection and use of participant data and biological specimens in ancillary studies, if applicable                                                                                                                                               |
| 14 |                               |     |                                                                                                                                                                                                                                                                                     |
| 15 |                               |     |                                                                                                                                                                                                                                                                                     |
| 16 |                               |     |                                                                                                                                                                                                                                                                                     |
| 17 | Confidentiality               | 27  | How personal information about potential and enrolled participants will be collected, shared, and maintained in order to protect confidentiality before, during, and after the trial                                                                                                |
| 18 |                               |     |                                                                                                                                                                                                                                                                                     |
| 19 |                               |     |                                                                                                                                                                                                                                                                                     |
| 20 |                               |     |                                                                                                                                                                                                                                                                                     |
| 21 | Declaration of interests      | 28  | Financial and other competing interests for principal investigators for the overall trial and each study site                                                                                                                                                                       |
| 22 |                               |     |                                                                                                                                                                                                                                                                                     |
| 23 | Access to data                | 29  | Statement of who will have access to the final trial dataset, and disclosure of contractual agreements that limit such access for investigators                                                                                                                                     |
| 24 |                               |     |                                                                                                                                                                                                                                                                                     |
| 25 |                               |     |                                                                                                                                                                                                                                                                                     |
| 26 |                               |     |                                                                                                                                                                                                                                                                                     |
| 27 | Ancillary and post-trial care | 30  | Provisions, if any, for ancillary and post-trial care, and for compensation to those who suffer harm from trial participation                                                                                                                                                       |
| 28 |                               |     |                                                                                                                                                                                                                                                                                     |
| 29 |                               |     |                                                                                                                                                                                                                                                                                     |
| 30 | Dissemination policy          | 31a | Plans for investigators and sponsor to communicate trial results to participants, healthcare professionals, the public, and other relevant groups (eg, via publication, reporting in results databases, or other data sharing arrangements), including any publication restrictions |
| 31 |                               |     |                                                                                                                                                                                                                                                                                     |
| 32 |                               | 31b | Authorship eligibility guidelines and any intended use of professional writers                                                                                                                                                                                                      |
| 33 |                               |     |                                                                                                                                                                                                                                                                                     |
| 34 |                               | 31c | Plans, if any, for granting public access to the full protocol, participant-level dataset, and statistical code                                                                                                                                                                     |
| 35 |                               |     |                                                                                                                                                                                                                                                                                     |
| 36 |                               |     |                                                                                                                                                                                                                                                                                     |
| 37 |                               |     |                                                                                                                                                                                                                                                                                     |
| 38 |                               |     |                                                                                                                                                                                                                                                                                     |
| 39 |                               |     |                                                                                                                                                                                                                                                                                     |
| 40 | <b>Appendices</b>             |     |                                                                                                                                                                                                                                                                                     |
| 41 |                               |     |                                                                                                                                                                                                                                                                                     |
| 42 | Informed consent materials    | 32  | Model consent form and other related documentation given to participants and authorised surrogates                                                                                                                                                                                  |
| 43 |                               |     |                                                                                                                                                                                                                                                                                     |
| 44 |                               |     |                                                                                                                                                                                                                                                                                     |
| 45 | Biological specimens          | 33  | Plans for collection, laboratory evaluation, and storage of biological specimens for genetic or molecular analysis in the current trial and for future use in ancillary studies, if applicable                                                                                      |
| 46 |                               |     |                                                                                                                                                                                                                                                                                     |
| 47 |                               |     |                                                                                                                                                                                                                                                                                     |
| 48 |                               |     |                                                                                                                                                                                                                                                                                     |
| 49 |                               |     |                                                                                                                                                                                                                                                                                     |
| 50 |                               |     |                                                                                                                                                                                                                                                                                     |
| 51 |                               |     |                                                                                                                                                                                                                                                                                     |
| 52 |                               |     |                                                                                                                                                                                                                                                                                     |
| 53 |                               |     |                                                                                                                                                                                                                                                                                     |
| 54 |                               |     |                                                                                                                                                                                                                                                                                     |
| 55 |                               |     |                                                                                                                                                                                                                                                                                     |
| 56 |                               |     |                                                                                                                                                                                                                                                                                     |
| 57 |                               |     |                                                                                                                                                                                                                                                                                     |
| 58 |                               |     |                                                                                                                                                                                                                                                                                     |
| 59 |                               |     |                                                                                                                                                                                                                                                                                     |
| 60 |                               |     |                                                                                                                                                                                                                                                                                     |

8

# BMJ Open

## A comparative study of three treatment interventions for patellar tendinopathy: a protocol for a randomized controlled trial

|                                 |                                                                                                                                                                                                                                                                                                                                                                                                                                                                                                                                                                                                                                                                                                                                                                    |
|---------------------------------|--------------------------------------------------------------------------------------------------------------------------------------------------------------------------------------------------------------------------------------------------------------------------------------------------------------------------------------------------------------------------------------------------------------------------------------------------------------------------------------------------------------------------------------------------------------------------------------------------------------------------------------------------------------------------------------------------------------------------------------------------------------------|
| Journal:                        | <i>BMJ Open</i>                                                                                                                                                                                                                                                                                                                                                                                                                                                                                                                                                                                                                                                                                                                                                    |
| Manuscript ID                   | bmjopen-2019-034304.R1                                                                                                                                                                                                                                                                                                                                                                                                                                                                                                                                                                                                                                                                                                                                             |
| Article Type:                   | Protocol                                                                                                                                                                                                                                                                                                                                                                                                                                                                                                                                                                                                                                                                                                                                                           |
| Date Submitted by the Author:   | 17-Nov-2019                                                                                                                                                                                                                                                                                                                                                                                                                                                                                                                                                                                                                                                                                                                                                        |
| Complete List of Authors:       | Lopez-Royo, Maria Pilar; Universidad San Jorge Facultad de Ciencias de la Salud; Universidad de Zaragoza, Facultad de Ciencias de la Salud<br>Gómez-Trullén, Eva Maria; Universidad de Zaragoza, Facultad de Ciencias de la Salud<br>Ortiz-Lucas, Maria; Universidad San Jorge Facultad de Ciencias de la Salud<br>Galán-Díaz, Rita Maria; Universidad San Jorge Facultad de Ciencias de la Salud<br>Bataller-Cervero, Ana Vanessa; Universidad San Jorge Facultad de Ciencias de la Salud<br>Al-Boloushi, Zaid; Universidad de Zaragoza Facultad de Ciencias; Kuwait Ministry of Health<br>Hamam-Alcober, Yasmina; Universidad San Jorge Facultad de Ciencias de la Salud, Fisioterapia<br>Herrero, Pablo; Universidad San Jorge Facultad de Ciencias de la Salud |
| <b>Primary Subject Heading</b>: | Rehabilitation medicine                                                                                                                                                                                                                                                                                                                                                                                                                                                                                                                                                                                                                                                                                                                                            |
| Secondary Subject Heading:      | Sports and exercise medicine                                                                                                                                                                                                                                                                                                                                                                                                                                                                                                                                                                                                                                                                                                                                       |
| Keywords:                       | Eccentric Exercise, Tendinopathy, Percutaneous Needle Electrolysis, Dry Needling                                                                                                                                                                                                                                                                                                                                                                                                                                                                                                                                                                                                                                                                                   |
|                                 |                                                                                                                                                                                                                                                                                                                                                                                                                                                                                                                                                                                                                                                                                                                                                                    |

SCHOLARONE™  
Manuscripts

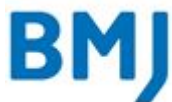

I, the Submitting Author has the right to grant and does grant on behalf of all authors of the Work (as defined in the below author licence), an exclusive licence and/or a non-exclusive licence for contributions from authors who are: i) UK Crown employees; ii) where BMJ has agreed a CC-BY licence shall apply, and/or iii) in accordance with the terms applicable for US Federal Government officers or employees acting as part of their official duties; on a worldwide, perpetual, irrevocable, royalty-free basis to BMJ Publishing Group Ltd ("BMJ") its licensees and where the relevant Journal is co-owned by BMJ to the co-owners of the Journal, to publish the Work in this journal and any other BMJ products and to exploit all rights, as set out in our [licence](#).

The Submitting Author accepts and understands that any supply made under these terms is made by BMJ to the Submitting Author unless you are acting as an employee on behalf of your employer or a postgraduate student of an affiliated institution which is paying any applicable article publishing charge ("APC") for Open Access articles. Where the Submitting Author wishes to make the Work available on an Open Access basis (and intends to pay the relevant APC), the terms of reuse of such Open Access shall be governed by a Creative Commons licence – details of these licences and which [Creative Commons](#) licence will apply to this Work are set out in our licence referred to above.

Other than as permitted in any relevant BMJ Author's Self Archiving Policies, I confirm this Work has not been accepted for publication elsewhere, is not being considered for publication elsewhere and does not duplicate material already published. I confirm all authors consent to publication of this Work and authorise the granting of this licence.

1  
2  
3 A comparative study of three treatment interventions for patellar tendinopathy: a  
4  
5 protocol for a randomized controlled trial  
6  
7

8 López-Royo MP<sup>a,b</sup>, Gómez-Trullén EM<sup>b</sup>, Ortiz-Lucas M<sup>a</sup>, Galán-Díaz RM<sup>a</sup>, Bataller-Cervero  
9  
10 AV<sup>a</sup>, Al-Boloushi Z<sup>b,c</sup>, Hamam-Alcober Y<sup>a</sup>, Herrero P<sup>a\*</sup>  
11  
12

13 **AFFILIATIONS**  
14

- 15  
16 **A.** iPhysio Research Group. Universidad San Jorge. Campus Universitario, Autov.  
17 A23 km 299, 50830. Villanueva de Gállego, Zaragoza, Spain.  
18  
19 **B.** Universidad de Zaragoza. Facultad de Ciencias de la Salud. Dpto. de Fisiatría y  
20 Enfermería. C/ Domingo Miral s/n, 50009 - Zaragoza, Spain.  
21  
22 **A.** Ministry of Health, State of Kuwait. Jamal Abdunnasser Street, Al Solaibeykhat  
23 Area 5. Kuwait City. Safat 13001.  
24  
25  
26  
27  
28  
29  
30  
31  
32

33 **\*CORRESPONDENCE TO:**  
34

35  
36 Dr. Pablo Herrero. iPhysio Research Group. Universidad San Jorge. Campus  
37 Universitario, Autov A23, Km 299, 50830 Villanueva de Gállego, Zaragoza, Spain.  
38  
39 Tel.: (+34) 976 060 100 Fax: 976 077 581. Email: pherrero@usj.es  
40  
41  
42

43 **ADDITIONAL AUTHOR INFORMATION**  
44

45  
46 Maria Pilar López Royo. Emails: mplopez@usj.es  
47

48  
49 Eva María Gómez Trullén. Email: evagomez@unizar.es  
50

51  
52 María Ortiz Lucas. Email: mariaortizlucas@gmail.com  
53

54  
55 Rita María Galán Díaz. Email: rmgalan@usj.es  
56

57  
58 Ana Vanessa Bataller-Cervero. Email: avbataller@usj.es  
59  
60

1  
2  
3 Yasmina Hamam-Alcober. Email: yhamam@usj.es  
4  
5

6 Zaid AL-boloushi. Email: boloushi@me.com  
7  
8  
9

10  
11  
12 **WORD COUNT:** 3924words.  
13  
14  
15

## 16 17 **ABSTRACT**

18  
19 **Introduction:** Patellar tendinopathy is a degenerative disease of the patellar tendon,  
20 which affects athletes from a variety of sports, and is especially predominant in sports  
21 involving high-impact jumping. The aim of this study is to compare the effectiveness of  
22 needling therapies in order to determine the most effective treatment protocol of patellar  
23 tendinopathy.  
24  
25  
26  
27  
28  
29

30  
31 **Methods and analysis:** This study is a randomized controlled trial with blinded  
32 participants. Measurements will be carried out by a specially trained blinded assessor. A  
33 sample of 57 patients with a medical diagnosis of patellar tendinopathy will participate  
34 in this study and will be divided into three treatment groups. Eligible participants will be  
35 randomly allocated to receive either: (a) treatment group with Percutaneous Needle  
36 Electrolysis, (b) treatment group with Dry Needling or (c) treatment group with placebo  
37 needling. In addition, all groups will perform eccentric exercise. Functionality and muscle  
38 strength parameters, pain, ultrasound appearances and patient perceived quality of life  
39 shall be evaluated using the VISA-p, jump test, VAS, US images and SF-36, respectively.  
40  
41  
42  
43  
44  
45  
46  
47  
48  
49  
50  
51  
52  
53  
54  
55  
56  
57  
58  
59  
60  
Participants will be assessed at baseline, at 10 weeks and at 22 weeks after baseline. The  
expected findings will allow us to advance in the treatment of this injury as they will help  
determine whether a needling intervention has additional effects on an eccentric exercise  
program and whether any of the needling modalities is more effective than the other.



1  
2  
3 **Ethics and dissemination:** This protocol has been approved by the Ethics Committee of  
4 Aragon (N° PI15/0017). The trial will be conducted in accordance with the Declaration  
5 of Helsinki.  
6  
7  
8

9 **Trial Registration Number:** NCT02498795.  
10  
11  
12

### 13 **Strengths and limitations of this study**

- 14 - This randomized clinical trial will report the effects on functionality and pain of three  
15 different treatment interventions in both the short and long term.
- 16 - The double-blinded and placebo-control design will enhance objectivity and help reduce  
17 bias.
- 18 - The effects of two minimally invasive treatments in physical therapy will be compared  
19 for the first time in patellar tendinopathy.  
20  
21  
22  
23  
24  
25  
26  
27  
28  
29  
30  
31  
32

## 33 **INTRODUCTION**

34 Patellar tendinopathy (PT), also known as jumper's knee, is a degenerative condition  
35 affecting the patellar tendon resulting in anterior knee pain associated with focal and  
36 palpable tenderness at the inferior pole of the patella. This disorder has similar histologic  
37 findings to other tendon disorders characterized by an increased thickness of the tendon  
38 and changes in vascularity, and cellularity, with incompletely healed tendon micro-  
39 ruptures and disturbed collagen distribution(1).  
40  
41  
42  
43  
44  
45  
46  
47  
48

49 This degenerative condition affects athletes from a variety of sports, and is especially  
50 predominant in sports involving high-impact jumping. The overall prevalence of PT in  
51 non-elite players is 8.5%, although this figure increases in sports that place high demands  
52 on the patellar ligament, increasing up to 14.2% in volleyball athletes. Among elite  
53 volleyball and basketball players, a prevalence of 45% and 32%, respectively, has been  
54  
55  
56  
57  
58  
59  
60

1  
2  
3 reported. In addition, jumper's knee is almost twice as common among male non-elite  
4 athletes when compared with female athletes(2).  
5

6  
7 The diagnosis is typically based on the clinical history and symptomatic findings.  
8  
9 Currently, imaging techniques, such as color-Doppler ultrasound (CD-US) and gray scale  
10 ultrasound (GS-US) can be used for the assessment of the patellar tendon to clinically  
11 confirm the diagnosis(3).  
12  
13  
14

15  
16 Treatments used for PT fall into two major groups. The first group comprises medical  
17 treatments which include non-steroidal anti-inflammatory drugs (NSAIDs), platelet-rich  
18 plasma injection(4) and autologous growth factors(5). The second group consists of  
19 physical therapies, including both conservative and invasive approaches (needling  
20 techniques).  
21  
22  
23  
24  
25  
26  
27

28 Conservative therapies are generally accepted as the first line of approach for managing  
29 PT(6, 7), considering exercise as the gold standard of treatment, either eccentric exercise  
30 (EE) or high slow resistance training programs. Both had demonstrated similar  
31 effectiveness in the treatment of PT(6-8). In 2012, EE was shown to be effective in the  
32 treatment of tendinopathies at various locations of the body, including PT, and there was  
33 a greater likelihood of clinical improvement when performed on a declined surface(6, 8,  
34 9). In recent years, further evidence now supports the fact that exercise is more effective  
35 than other conventional treatments in tendinopathy, such as iontophoresis, US, Cyriax  
36 treatment, etc.(10).  
37  
38  
39  
40  
41  
42  
43  
44  
45  
46  
47  
48

49 Physical therapy approaches for PT continue to evolve and a number of innovative  
50 treatment options are now available, such as dry needling (DN)(11), electrotherapeutic  
51 invasive modalities (e.g. electrolysis)(12-14) and extracorporeal shockwave (ECSW)  
52 therapy(15). Recently, research has focused on regenerative therapies with high  
53 expectations of success because some of these techniques seem to achieve a rapid  
54  
55  
56  
57  
58  
59  
60

1  
2  
3 regeneration of the injured tendon(11, 12, 16). However, evidence-based regenerative  
4 therapies are limited and there is no agreement to date regarding which of these is the  
5 most effective(17). DN consists of the insertion of a needle (filiform and solid, non-  
6 beveled) with the aim of provoking a local injury leading to an inflammatory response  
7 and the subsequent regeneration of the injured area in approximately one week. A study  
8 performed by Abat et al. reported that DN induced histological and mechanical changes  
9 in rat Achilles tendons at week one, with changes persisting at week four(18).  
10 Percutaneous Needle Electrolysis (PNE) is an ultrasound-guided technique used by  
11 physiotherapists consisting of causing localized lysis in the damaged and/or degenerated  
12 tissue by means of a galvanic current transmitted through an acupuncture needle. This  
13 technique may affect inflammatory mediators in damaged muscle tissue and influence the  
14 new vascularization of the injured area in rats(18). James et al.(11) carried out a cohort  
15 study in humans analyzing one group treated with DN and another treated with autologous  
16 blood injections. In both cases, they found improvements compared to the baseline  
17 measurements. However, this study failed to find differences between the different  
18 treatments, concluding that both techniques were equally effective. In relation to PNE, a  
19 former study(14) analyzed the treatment effect of electrolysis applied once a week in a  
20 group of patients without any control or comparative group, reporting that patients  
21 obtained statistically and clinically significant improvements compared to baseline  
22 measurements.

23  
24 From a biological point of view, it seems reasonable to hypothesize that a patient will  
25 obtain benefits thanks to the mechanical effects provided by the needle, and that patients  
26 may benefit more if the electrolysis effect is added to the mechanical stimuli provided by  
27 the needle(16).  
28  
29  
30  
31  
32  
33  
34  
35  
36  
37  
38  
39  
40  
41  
42  
43  
44  
45  
46  
47  
48  
49  
50  
51  
52  
53  
54  
55  
56  
57  
58  
59  
60

1  
2  
3 Therefore, the aim of this study is to determine whether invasive techniques have  
4 additional effects for the treatment of PT when compared with EE alone, and whether the  
5 application of PNE provides any additional benefits aside from performing DN alone, in  
6 the short and long term.  
7  
8  
9  
10  
11  
12  
13  
14

## 15 **METHODS AND ANALYSIS**

### 17 **Study design**

18  
19  
20 The trial is designed as a randomized, controlled, participant, investigator and outcomes  
21 assessor blinded, experimental study, aimed at comparing three different physiotherapy  
22 protocols applied in three intervention groups of PT patients. Randomization will be  
23 performed as block randomization with a 1:1:1 allocation.  
24  
25  
26  
27  
28

29 This protocol follows the standards of the Helsinki Convention of good clinical practices.  
30 The Ethics Committee of Aragon (CEICA) has evaluated the project and has given its  
31 favorable opinion and support, N° PI15/0017 (Appendix 1).  
32  
33  
34  
35

36 The study has been carried out following the SPIRIT statement for clinical trial protocol  
37 and a SPIRIT Checklist has been included (Appendix 2).  
38  
39  
40  
41  
42

### 43 **Study setting**

44 After reviewing the literature and observing the high incidence of this pathology in  
45 amateur young adults who perform sports and more specifically, jump sports, the search  
46 of patients has been performed in sports clubs of basketball, football, volleyball, CrossFit,  
47 and handball, together with running clubs and several gyms located in the city. A decision  
48 was made to conduct the study in X, where the university is located, as well as the  
49 laboratory to be used for assessments and treatments.  
50  
51  
52  
53  
54  
55  
56  
57  
58  
59  
60

1  
2  
3 The assessments will be conducted at the Motion Analysis laboratory of X, and the  
4  
5 treatment will be performed at two different sites depending on the availability of both  
6  
7 spaces and of schedules. Nonetheless, the same material will always be used.  
8  
9

## 10 11 12 **Participants**

### 13 14 *Inclusion criteria*

15  
16 Participants eligible for inclusion in this study must meet the following criteria: 1. History  
17  
18 of PT and anterior knee pain located on the inferior pole of the patella for over three  
19  
20 months; 2. Aged between 18 and 45 years; 3. Palpation tenderness of the superior  
21  
22 insertion of the patellar tendon; 4. A score below 80 on the VISA-p questionnaire.  
23  
24

### 25 26 *Exclusion criteria*

27  
28 Exclusion criteria for the study are: 1. Knee surgery within the previous six months; 2.  
29  
30 Chronic joint diseases; 3. Corticosteroid injection in the patellar tendon within the  
31  
32 previous three months; 4. Contraindications for needling; 5. Use of drugs 48 hours  
33  
34 previously (e.g. NSAIDs); 6. Any other concomitant treatment for PT.  
35  
36  
37  
38  
39

## 40 41 **Methodology**

42  
43 In the first session, all participants will be instructed on how to perform a daily home  
44  
45 program of EE. This will consist of performing three sets of 15 single leg squat repetitions  
46  
47 on a decline board every day, according to Alfredson's protocol(19) increasing the speed  
48  
49 if participants do not have pain. Participants will be informed that exercise is allowed to  
50  
51 reach 5 in a numerical pain rating scale(20), and if it is higher then they will stop and  
52  
53 notify the researcher, attempting once again 24 h later following the same rules.  
54  
55

56  
57 For the interventions, the participants will be placed in a supine position with a pillow  
58  
59 under the knee (approximately 20° of knee flexion). The area will be cleansed with an  
60

1  
2  
3 antiseptic solution (70% Propan-2-ol, Skin-des). An ultrasound probe cover will be used  
4  
5 during the intervention for infectious control. To determine the relevant treatment area,  
6  
7 two factors will be considered: 1) Palpation of the areas exhibiting higher sensitivity and  
8  
9 that reproduce the patient's symptoms; 2) Tendon areas showing degenerative changes  
10  
11 assessed under ultrasound. Each group will receive a total of four sessions distributed  
12  
13 throughout eight weeks of treatment, once every two weeks.  
14  
15  
16  
17  
18

19 *DN intervention combined with EE (DN-G) and PNE intervention combined with EE*  
20  
21 *(PNE-G)*  
22

23 Specific DN needles will be used during needling treatments, (Agu-punt, Spain).  
24  
25 Considering the thickness of the tendon and the approach, we shall use needles measuring  
26  
27 0.25 x 25 mm. The procedure will be guided by US to ensure the specificity of application  
28  
29 on the injured area and to guarantee that the procedure is safe for the patient. The DN  
30  
31 needle will reach the relevant treatment area (areas with degenerative PT changes). Each  
32  
33 session will consist of three needle insertions lasting three seconds each. In PNE-G  
34  
35 applications, an intensity of 3 mA galvanic current will be used during the three seconds  
36  
37 that the procedure lasts. The dose of 3 mA has demonstrated to be as effective as 6 mA  
38  
39 in the treatment of tendinopathy injuries in animal models(18) as a result, the lower dose  
40  
41 was selected for this study.  
42  
43  
44  
45  
46  
47  
48

49 *Control group (CG)*  
50

51 A sham needle will be placed upon the treatment zone, simulating the same procedure as  
52  
53 the rest of participants enrolled in the other groups. The needle will be placed in a specific  
54  
55 holder and will be manipulated during the intervention to simulate a real treatment. This  
56  
57  
58  
59  
60

holder will have a cover over the bottom part of the same in order to avoid the needle contacting the skin.

## Outcomes

### *Baseline data*

Baseline data will include gender, age, height, weight, body-mass index, affected side, level, sports and frequency of physical activity, duration of symptoms, medication and previous rehabilitation treatments and infiltrations received. A blinded observer will assess all participants at baseline, 10 weeks and 22 weeks after baseline. Participants will be asked to inform the researchers if there were any changes in medication or if they are receiving any other treatment or infiltration during the study.

### *Primary outcome measure*

Participants will complete the VISA-p questionnaire at baseline. The VISA-p questionnaire is designed to measure the severity of PT(21). The VISA-p score is the primary outcome variable. This scale consists of eight questions, the first six questions of which employ an analogical visual scale in order to assign a score of 0 to 10, where 10 represents the optimum state, for the purpose of quantifying pain and function in different activities, whereas the last two questions assess the level of functionality and ability to perform physical activity.

### *Secondary outcome measure*

At the first evaluation, participants will complete the Visual Analog Scale (VAS), considering the level of pain they feel while practicing their sport's activity. Participants will be explained that a score of 0 indicates the absence of pain whereas a score of 10 represents the maximum tolerable pain. They will also complete a questionnaire to assess their quality of life (SF-36)(22).

1  
2  
3 In order to assess tendon structure, an US evaluation using ultrasound equipment (Logic  
4 S7 Expert, General Electric Healthcare) and a linear probe (MLG-15 5–10 MHz) will be  
5 used. The ultrasonographic assessment protocol will be carried out according to the  
6 Musculoskeletal Ultrasound Technical Guidelines: Knee, defined by the European  
7 Society of Musculoskeletal Radiology(23). The ultrasonographic assessment will consist  
8 of a longitudinal sequence from the tendon origin to the insertion and transverse sections  
9 on the pole of the patella, the tendon body and its insertion on the tibial tuberosity, with  
10 the subject in supine position, with 20° knee flexion, and a pillow under the knee. The  
11 presence of degenerative signs compatible with the medical diagnosis of PT (thickness of  
12 the tendon, hypoechoic areas, irregularities affecting the cortical bone, calcifications) that  
13 could be relevant for the selection of the target area will also be assessed. In addition,  
14 CD-US assessment will be carried out to detect the presence of hypervascularization, with  
15 the subject in supine position and with the knee relaxed in full extension, in order to obtain  
16 further information to specifically define the target area.  
17  
18  
19  
20  
21  
22  
23  
24  
25  
26  
27  
28  
29  
30  
31  
32  
33  
34

35 Upon completion of the evaluation, a jump test will be carried out, measured with a force  
36 platform (FP4060-10-2000, Bertec Corporation). In this evaluation, subjects will warm  
37 up during 5 minutes on a treadmill, subsequently, they will perform dynamic stretches for  
38 the leg muscles. The Jump test will be explained to participants and they will be asked to  
39 demonstrate how they will perform the assessment to ensure that they have understood it  
40 before going to the platform. Later, patients will go to the platform forces and will  
41 perform each jump 3 times (squat jump, Abalakov jump and countermovement jump test)  
42 with 60 seconds between jumps and 2 minutes between different jumps (Table 1)(24-26).  
43 The maximum height of the jump will be analyzed via the measurement of the flight time  
44 recorded on the force platforms, the eccentric power and the maximum concentric force  
45 performed. The Abalakov jump will be performed with the subject standing in an upright  
46  
47  
48  
49  
50  
51  
52  
53  
54  
55  
56  
57  
58  
59  
60



1  
2  
3 position with a full arm swing. A rapid downward movement will be immediately  
4 followed by a rapid upward vertical movement as high as possible, all in one sequence.  
5  
6 The same procedure will be applied for the CMJ jump, however, this test will be  
7 performed with the hands on the hips to avoid arm swings. Finally, a Squat Jump will be  
8 performed with 90 degrees of flexion of the knee.  
9  
10  
11  
12  
13  
14  
15  
16

### 17 **Participant timeline**

18  
19 The study design will be a double-blind randomized controlled trial. The flow chart of  
20 the trial is shown in Figure 1 and the check list SPIRIT schedule is shown in Figure 2.  
21  
22  
23  
24  
25

### 26 **'Patient and Public Involvement'**

27  
28 Patients who had PT were not involved in setting the research question or the outcome  
29 measures, however the concept of patient involvement translated to the execution phases  
30 of the research. Patients and their families were central to the dissemination of the  
31 information, which helped to recruit study participants. We intend to disseminate the main  
32 results to trial participants and will seek patient and public involvement in the  
33 development of an appropriate method of dissemination.  
34  
35  
36  
37  
38  
39  
40  
41  
42  
43  
44

### 45 **Sample size**

46  
47 Regarding the sample size, a calculation of statistical power was made prior to the study.  
48  
49 Accepting an alpha risk of 0.05 and a beta risk in a bilateral contrast, 19 subjects are  
50 needed in every treatment group to detect a difference equal or superior to 15 points on  
51 the VISA-p scale and assuming a standard deviation of 15 points(27). The estimated rate  
52 of loss to follow-up is 20%.  
53  
54  
55  
56  
57  
58  
59  
60

1  
2  
3 Recruitment of subjects for the trial will take place between October 2018 and March  
4  
5 2020 and will be carried out by means of informative campaigns targeted at different  
6  
7 Sports Clubs and Federations by means of e-mail and advertisements in the different  
8  
9 University mass media.

10  
11  
12 The interested subjects will receive an e-mail explaining the inclusion and exclusion  
13  
14 criteria, as well as the purpose of the study. *If they meet the defined criteria, they will be*  
15  
16 *invited to send us their medical diagnosis.*

### 21 **Recruitment**

22  
23 Participants will be recruited from sports clubs by the physiotherapist or the coach.  
24  
25 Contact has been made with various orthopedists who will collaborate with recruitment,  
26  
27 so that when they establish a diagnosis of this pathology in their examination room they  
28  
29 can refer us to the patients for their recruitment to the study.  
30  
31

### 35 **Allocation**

32  
33  
34 Participants will be randomly assigned to either CG or DN-G or PNE-G with a 1:1:1  
35  
36 allocation using an opaque envelope, with a block size of fifteen participants (5 for each  
37  
38 group).  
39  
40

41  
42 Sealed opaque randomization envelopes with a study-specific participant number will be  
43  
44 supplied by an external statistician. A colleague not involved in the research study will  
45  
46 take the sealed opaque numbered envelopes in order, by number, and deliver the correct  
47  
48 envelope to the treating physical therapist. The envelope will contain a piece of paper,  
49  
50 which will be labelled with the same participant specific number, plus the group  
51  
52 assignment (PNE-G, DN-G or CG).  
53  
54  
55  
56  
57  
58  
59  
60

1  
2  
3 Participants who fulfill the inclusion criteria will receive the standardized oral and written  
4 information, and, once they grant their consent to take part in the trial, they will be  
5  
6 randomized into the three groups.  
7  
8  
9

## 10 11 12 **Blinding**

13  
14 Assessments regarding clinical recovery will be conducted by an assessor blinded to  
15 treatment allocation. Due to the nature of the intervention, participants can be blinded to  
16 allocation. Patients will be explained that they are going to receive a needling treatment,  
17 that it may be a bit painful, and that if at any moment they are unable to tolerate the pain  
18 they must inform the researcher to stop the intervention. In order to blind patients, all the  
19 interventions were made with the ultrasound and the PNE device connected to simulate  
20 the same intervention in all groups. In contrast, the physiotherapist performing the  
21 intervention cannot be blinded, however will be instructed not to disclose the allocation  
22 status of the participant at any time or during the follow up assessments. An employee  
23 outside the research team will feed data into the computer in separate datasheets so that  
24 the researchers can analyze data without having access to information about the  
25 allocation.  
26  
27  
28  
29  
30  
31  
32  
33  
34  
35  
36  
37  
38  
39  
40  
41

42 With the intention of evaluating patient blinding, an online questionnaire will be sent to  
43 participants upon completion of the study, asking them about the treatment they received.  
44  
45  
46  
47  
48

## 49 **Data collection methods**

50  
51 For the data collection of the participants, an oral questionnaire will be used containing  
52 questions targeted at collecting baseline data and information concerning the pathology.  
53  
54  
55  
56  
57  
58  
59  
60

1  
2  
3 Different questionnaires and assessment scales (VISA-p, VAS, SF-36) in Spanish will  
4 be given to each participant in paper when they attend the assessment, and they will be  
5 granted sufficient time to complete the same.  
6  
7  
8  
9

### 10 11 12 **Data management and statistical analysis** 13

14 In this study, all data will be entered electronically in the assessment room.

15  
16 Original scales and questionnaires will be entered and kept on a locked file at the  
17 participating site.  
18

19 Participant files are to be stored in numerical order and stored in a secure and accessible  
20 place and manner. Participant files will be maintained in storage for a period of 2 years  
21 after completion of the study.  
22  
23

24 The statistical analysis will be carried out by an intention-to-treat analysis. Variables will  
25 be described in number (percentage) and average (standard deviation) or median  
26 (interquartile range) attending to their distribution. Quantitative variables will be  
27 analyzed with the Shapiro Wilk test in order to confirm their distribution and to determine  
28 correct statistical tests according to these results.  
29  
30

31 Outcomes will be analyzed using mixed linear and logistic regression models considering  
32 participants as a random effect and group of treatment as fixed factors. Baseline  
33 characteristics will be introduced in the model as covariance. Numbers needed to treat  
34 index will also be calculated. The primary aim of the analysis will be to calculate the  
35 difference obtained in the VISA-p score after the intervention (final measurement - initial  
36 measurement). Finally, the magnitude of the effect of the result shall be calculated and  
37 therefore its clinical importance, by means of the following formula:  
38  
39

$$40 \quad I^* = \sqrt{\frac{F(1,dfR)}{F(1,dfR) + dfR}}$$

41 The significance level set for all the analysis will be  $p \leq 0.05$ .  
42  
43  
44  
45  
46  
47  
48  
49  
50  
51  
52  
53  
54  
55  
56  
57  
58  
59  
60

## ETHICS AND DISEMINATION

The study design, procedures and informed consent procedure were approved and consequently the study will be carried out in compliance with the Helsinki Declaration of Human Rights. All participants will have to provide written Spanish informed consent.

Appendix A.

The trial's results will be published in peer-reviewed international journals or otherwise made publicly available and will be presented at national and international conferences and symposiums irrespective of the outcomes.

Any modifications to the protocol, which may impact the study procedures, potential patient benefits or may affect patient safety, including changes of study objectives, study design, patient population, sample sizes, study procedures, or significant administrative aspects will require a formal amendment to the protocol. Such amendments will be approved by the Ethics Committee prior to implementation and notified to the health authorities in accordance with local regulations.

All study-related information will be stored securely at the study site. All participant information will be stored in locked file cabinets in areas with limited access. All records that contain names or other personal identifiers, such as locator forms and informed consent forms, will be stored identified by code number. All local databases will be secured with password-protected access systems.

**Availability of data and material:** The datasets used and/or analyzed during the current study are available from the corresponding author on reasonable request.

## DISCUSSION

1  
2  
3 This study seeks to investigate the effects of physiotherapy needling techniques on pain,  
4  
5 functionality and quality of life in PT.  
6

7  
8 PT is a common cause of knee pain in cases of degeneration of the patellar tendon. Among  
9  
10 the causes of PT, extrinsic factors (e.g., patellar tendon loading with exercise) and  
11  
12 intrinsic factors (e.g., malalignment, high patella, imbalances) have been proposed(28).  
13  
14 Traditionally, the focus has been on quadriceps strengthening exercises and many reviews  
15  
16 have shown that the effect of the treatment could be estimated to give the patients a 50-  
17  
18 70% change of improvement on pain and functionality(6, 29, 30).  
19

20  
21 Regarding needling treatment, previous studies have shown a great improvement in PT  
22  
23 using PNE in combination with EE, with all patients reporting an improvement at least  
24  
25 one month after treatment(12-14, 18). This is an improvement compared to the minimum  
26  
27 three months needed to improve symptoms by applying other conventional techniques  
28  
29 (pharmacological and biological treatments, cold/heat techniques, shock waves, etc.)  
30  
31 Additionally, in a long-term study conducted in 2013, this technique was shown to  
32  
33 improve symptoms quickly and steadily for at least 10 years(31). These findings  
34  
35 demonstrate that this technique ensures that patients remain pain-free for a long period.  
36  
37 Furthermore, we were only able to find four articles(12-14, 18) addressing the application  
38  
39 of PNE for the recovery of PT, however, none of the articles studied were RCTs, which  
40  
41 entail limited evidence of the effectiveness of this technique.  
42  
43  
44  
45

46  
47 In addition, there are no standardized protocols for the application of PNE, which explains  
48  
49 the great variability in the number of sessions and application time based on the literature.  
50  
51 Therefore, this study aims to facilitate clinical practice and combine the available  
52  
53 methodology criteria in the application of this promising technique.  
54

55  
56 Regarding DN, the literature shows many similarities with PNE, since there is only one  
57  
58 RCT that compares functionality improvements among patients who have received PRP.  
59  
60

1  
2  
3 This study reflected that in the short term PRP had better results for pain and functionality,  
4  
5 however, DN was more effective than PRP after six months(32).  
6

7  
8 For the application of both needling techniques, US-guidance is normally used to be able  
9  
10 to observe firstly the presentation of the tendon, and later to observe the needle and enable  
11  
12 a much more specific treatment approach. However, US has disadvantages including its  
13  
14 operator dependence and the limited ability to rule out intra-articular disease. The  
15  
16 sensitivity and specificity of ultrasonography for patellar tendinopathy is between 58%  
17  
18 and 94%, respectively(33).  
19

20  
21 Moreover, functionality of the tendon is usually measured with the VISA-p(34, 35),  
22  
23 whereas jump tests (representing a similar action to that performed in subject's daily  
24  
25 sports) are only evaluated in a few papers(25, 36). Countermovement jumps and squat  
26  
27 jumps are the most reliable and valid field tests for the estimation of the explosive power  
28  
29 of the lower limbs in physically active men(37). Thus, we will combine both, in order to  
30  
31 be more accurate in the assessment of the tendon's functionality, and be able to assess  
32  
33 changes that may affect their sport performance.  
34  
35

36  
37 This study has several strengths. First, we will evaluate two techniques that currently lack  
38  
39 strong evidence. However, in doing so, we are contributing to new knowledge in the field  
40  
41 of the recovery of musculoskeletal injuries. Second, the role of invasive techniques will  
42  
43 be determined by comparing the effects between these techniques and a control group.  
44  
45 The reliability of data is ensured, as both patients and the assessor will be blinded. Third,  
46  
47 a sub-analysis with US will be performed to investigate changes in the presence of  
48  
49 calcifications, cortical irregularities, neovascularization, thickness, eco-intensity, eco-  
50  
51 variation and eco-texture of the patellar tendon.  
52  
53  
54  
55  
56  
57  
58  
59  
60

1  
2  
3 However, there are some limitations to this study. Blinding of the physiotherapist  
4 performing the intervention is not possible. Furthermore, follow-up is limited to 22 weeks  
5 after baseline.  
6  
7

8  
9  
10 The findings obtained may help advance the treatment of this injury by identifying the  
11 most effective treatment protocol and to avoid the associated consequences, such as the  
12 prevention of relapses and reducing the potential impact on the musculoskeletal system.  
13  
14  
15

## 16 17 18 19 REFERENCES

- 20  
21  
22 1. Knobloch K. The role of tendon microcirculation in Achilles and patellar  
23 tendinopathy. *Journal of orthopaedic surgery and research.* 2008;3:18.
- 24  
25 2. Zwerver J, Bredeweg SW, van den Akker-Scheek I. Prevalence of Jumper's Knee  
26 Among Nonelite Athletes From Different Sports A Cross-Sectional Survey. *American*  
27 *Journal of Sports Medicine.* 2011;39(9):1984-8.
- 28  
29 3. Stenroth L, Sefa S, Arokoski J, Toyras J. Does Magnetic Resonance Imaging  
30 Provide Superior Reliability for Achilles and Patellar Tendon Cross-Sectional Area  
31 Measurements Compared with Ultrasound Imaging? *Ultrasound Med Biol.*  
32 2019;45(12):3186-98.
- 33  
34 4. Taylor DW, Petrera M, Hendry M, Theodoropoulos JS. A Systematic Review of  
35 the Use of Platelet-Rich Plasma in Sports Medicine as a New Treatment for Tendon and  
36 Ligament Injuries. *Clinical Journal of Sport Medicine.* 2011;21(4):344-52.
- 37  
38 5. Andres BM, Murrell GAC. Treatment of tendinopathy: What works, what does  
39 not, and what is on the horizon. *Clinical Orthopaedics and Related Research.*  
40 2008;466(7):1539-54.
- 41  
42 6. Larsson MEH, Kall I, Nilsson-Helander K. Treatment of patellar tendinopathy-a  
43 systematic review of randomized controlled trials. *Knee Surgery Sports Traumatology*  
44 *Arthroscopy.* 2012;20(8):1632-46.
- 45  
46 7. Kongsgaard M, Kovanen V, Aagaard P, Doessing S, Hansen P, Laursen AH, et  
47 al. Corticosteroid injections, eccentric decline squat training and heavy slow resistance  
48 training in patellar tendinopathy. *Scandinavian Journal of Medicine & Science in Sports.*  
49 2009;19(6):790-802.  
50  
51  
52  
53  
54  
55  
56  
57  
58  
59  
60



- 1  
2  
3 8. Murtaugh B, Ihm JM. Eccentric Training for the Treatment of Tendinopathies.  
4 Current Sports Medicine Reports. 2013;12(3):175-82.  
5
- 6 9. Young MA, Cook JL, Purdam CR, Kiss ZS, Alfredson H. Eccentric decline squat  
7 protocol offers superior results at 12 months compared with traditional eccentric protocol  
8 for patellar tendinopathy in volleyball players. British Journal of Sports Medicine.  
9 2005;39(2):102-5.  
10
- 11 10. Ortega-Castillo M, Medina-Porqueres I. Effectiveness of the eccentric exercise  
12 therapy in physically active adults with symptomatic shoulder impingement or lateral  
13 epicondylar tendinopathy: A systematic review. J Sci Med Sport. 2016;19(6):438-53.  
14
- 15 11. James SLJ, Ali K, Pocock C, Robertson C, Walter J, Bell J, et al. Ultrasound  
16 guided dry needling and autologous blood injection for patellar tendinosis. British Journal  
17 of Sports Medicine. 2007;41(8):518-21.  
18
- 19 12. Abat F DW, Gelber PE, Polidori F, Monllau JC, Sanchez-Ibañez JM.  
20 Effectiveness of the Intratissue Percutaneous Electrolysis (EPI®) technique and  
21 isoinertial eccentric exercise in the treatment of patellar tendinopathy at two years follow-  
22 up. Muscles Ligaments Tendons J. 2014;14(4):188-93.  
23
- 24 13. Valera Garrido F, Minaya Muñoz F, JM SI. Effectiveness of electrolysis  
25 percutaneous intratissular (EPI®) in chronic insertional patellar tendinopathy. Trauma  
26 Fund MAPFRE. 2010;21(4):227-36.  
27
- 28 14. Sánchez-Ibañez J, Alves R, Polidori F, Valera F, Minaya F, Valles-Martí S, et al.  
29 Effectiveness of ultrasound-guided percutaneous electrolysis intratendon (EPI) in the  
30 treatment of insertional patellar tendinopathy in soccer players. Br J Sports Med.  
31 2013;47(e2).  
32
- 33 15. Zwerver J, Verhagen E, Hartgens F, van den Akker-Scheek I, Diercks RL. The  
34 TOPGAME-study: effectiveness of extracorporeal shockwave therapy in jumping  
35 athletes with patellar tendinopathy. Design of a randomised controlled trial. BMC  
36 Musculoskeletal Disorders. 2010;11:6.  
37
- 38 16. Riggins CN, Chen M, Gordon JA, Schultz SM, Soslowky LJ, Khoury V.  
39 Ultrasound-Guided Dry Needling of the Healthy Rat Supraspinatus Tendon Elicits Early  
40 Healing Without Causing Permanent Damage. J Orthop Res. 2019;37(9):2035-42.  
41
- 42 17. Krey D, Borchers J, McCamey K. Tendon needling for treatment of tendinopathy:  
43 A systematic review. Physician and Sportsmedicine. 2015;43(1):80-6.  
44  
45  
46  
47  
48  
49  
50  
51  
52  
53  
54  
55  
56  
57  
58  
59  
60

18. Abat F, Valles S-L, Gelber P-E, Polidori F, Jorda A, Garcia-Herreros S, et al. An experimental study of muscular injury repair in a mouse model of notexin-induced lesion with EPI technique. *BMC sports science, medicine and rehabilitation*. 2015;7:7-.
19. Alfredson H, Pietila T, Jonsson P, Lorentzon P. Heavy-load eccentric calf muscle training for the treatment of chronic Achilles tendinosis. *American Journal of Sports Medicine*. 1998;26(3):360-6.
20. Silbernagel KG, Crossley KM. A Proposed Return-to-Sport Program for Patients With Midportion Achilles Tendinopathy: Rationale and Implementation. *J Orthop Sports Phys Ther*. 2015;45(11):876-86.
21. Hernandez-Sanchez S, Hidalgo MD, Gomez A. Cross-cultural Adaptation of VISA-P Score for Patellar Tendinopathy in Spanish Population. *Journal of Orthopaedic & Sports Physical Therapy*. 2011;41(8):581-91.
22. Alonso J, Prieto L, Anto JM. The spanish version of the SF-36 health survey- A measure of clinical outcomes. *Medicina Clinica*. 1995;104(20):771-6.
23. Martinoli C. Musculoskeletal ultrasound: technical guidelines. *Insights into imaging*. 2010;1(3):99-141.
24. Rodriguez-Rosell D, Mora-Custodio R, Franco-Marquez F, Yanez-Garcia JM, Gonzalez-Badillo JJ. Traditional vs. Sport-Specific Vertical Jump Tests: Reliability, Validity, and Relationship With the Legs Strength and Sprint Performance in Adult and Teen Soccer and Basketball Players. *J Strength Cond Res*. 2017;31(1):196-206.
25. Helland C, Bojsen-Moller J, Raastad T, Seynnes OR, Moltubakk MM, Jakobsen V, et al. Mechanical properties of the patellar tendon in elite volleyball players with and without patellar tendinopathy. *Br J Sports Med*. 2013;47(13):862-8.
26. Gual G, Fort-Vanmeerhaeghe A, Romero-Rodriguez D, Tesch PA. Effects of In-Season Inertial Resistance Training With Eccentric Overload in a Sports Population at Risk for Patellar Tendinopathy. *J Strength Cond Res*. 2016;30(7):1834-42.
27. Scott A, LaPrade RF, Harmon KG, Filardo G, Kon E, Della Villa S, et al. Platelet-Rich Plasma for Patellar Tendinopathy: A Randomized Controlled Trial of Leukocyte-Rich PRP or Leukocyte-Poor PRP Versus Saline. *Am J Sports Med*. 2019:363546519837954.
28. Figueroa D, Figueroa F, Calvo R. Patellar Tendinopathy: Diagnosis and Treatment. *J Am Acad Orthop Surg*. 2016;24(12):e184-e92.

- 1  
2  
3 29. Lian OB, Engebretsen L, Bahr R. Prevalence of jumper's knee among elite athletes  
4 from different sports - A cross-sectional study. *American Journal of Sports Medicine*.  
5 2005;33(4):561-7.  
6  
7  
8 30. Visnes H, Bahr R. The evolution of eccentric training as treatment for patellar  
9 tendinopathy (jumper's knee): a critical review of exercise programmes. *British Journal*  
10 *of Sports Medicine*. 2007;41(4):217-23.  
11  
12 31. Abat F, Gelber PE, Polidori F, Monllau JC, Sanchez-Ibanez JM. Clinical results  
13 after ultrasound-guided intratissue percutaneous electrolysis (EPIA (R)) and eccentric  
14 exercise in the treatment of patellar tendinopathy. *Knee Surgery Sports Traumatology*  
15 *Arthroscopy*. 2015;23(4):1046-52.  
16  
17 32. Dragoo JL, Wasterlain AS, Braun HJ, Nead KT. Platelet-Rich Plasma as a  
18 Treatment for Patellar Tendinopathy A Double-Blind, Randomized Controlled Trial.  
19 *American Journal of Sports Medicine*. 2014;42(3):610-8.  
20  
21 33. Warden SJ, Kiss ZS, Malara FA, Ooi ABT, Cook JL, Crossley KM. Comparative  
22 accuracy of magnetic resonance imaging and ultrasonography in confirming clinically  
23 diagnosed patellar tendinopathy. *American Journal of Sports Medicine*. 2007;35(3):427-  
24 36.  
25  
26 34. Hernandez-Sanchez S, Hidalgo MD, Gomez A. Cross-cultural adaptation of  
27 VISA-P score for patellar tendinopathy in Spanish population. *J Orthop Sports Phys Ther*.  
28 2011;41(8):581-91.  
29  
30 35. Andriolo L, Altamura SA, Reale D, Candrian C, Zaffagnini S, Filardo G.  
31 Nonsurgical Treatments of Patellar Tendinopathy: Multiple Injections of Platelet-Rich  
32 Plasma Are a Suitable Option: A Systematic Review and Meta-analysis. *Am J Sports*  
33 *Med*. 2019;47(4):1001-18.  
34  
35 36. de Vries A, Zwerver J, Diercks R, Tak I, van Berkel S, van Cingel R, et al. Effect  
36 of patellar strap and sports tape on pain in patellar tendinopathy: A randomized controlled  
37 trial. *Scand J Med Sci Sports*. 2016;26(10):1217-24.  
38  
39 37. Markovic G, Dizdar D, Jukic I, Cardinale M. Reliability and factorial validity of  
40 squat and countermovement jump tests. *J Strength Cond Res*. 2004;18(3):551-5.  
41  
42  
43  
44  
45  
46  
47  
48  
49  
50  
51  
52  
53  
54  
55  
56  
57  
58  
59  
60

## **AUTHOR'S CONTRIBUTIONS**

MPL, EMG and PH conceived of the idea, and developed the intervention. MPL and PH

| <b>JUMP TEST PROTOCOL</b>                                                    |                                                                              |
|------------------------------------------------------------------------------|------------------------------------------------------------------------------|
| 5-minute warm-up consisting of steady jogging on a treadmill                 |                                                                              |
| Dynamic Stretches lasting 5 minutes, as instructed by the physical therapist | Psoas<br>Quadriceps<br>Gluteus maximus<br>Gastrocnemius<br>Hamstring muscles |

wrote the article. MPL, MO, RMG, AVB, ZA, YH and PH developed the design of the trial. MO were involved in development of the statistical analysis of the trial and contributed to the content of the article. AVB contributed to the design and writing of the jump test protocol. All authors have read and approved the final manuscript.

## **FUNDING STATEMENT**

This research received no specific grant from any funding agency in the public, commercial or not-for-profit sectors.

## **COMPETING INTEREST STATEMENT**

The authors declare that they have no competing interests.

## **TABLES**

Table 1. Jump test's protocol.

|                                                                                                                                                                                                                                                                                                                          |                                                                         |
|--------------------------------------------------------------------------------------------------------------------------------------------------------------------------------------------------------------------------------------------------------------------------------------------------------------------------|-------------------------------------------------------------------------|
| <p>Three jump tests are performed</p> <ul style="list-style-type: none"> <li>- 3 jumps off the ground for 3 times for the patient to become familiar with the tests</li> <li>- The subject is placed on the platform and asked to perform each test 3 times, with 60 seconds rest between the different tests</li> </ul> | <p>Abalakov test</p> <p>Countermovement jump test</p> <p>Squat jump</p> |
| <p>The highest jump is selected for the study</p>                                                                                                                                                                                                                                                                        |                                                                         |

## FIGURES

Figure 1. Flow diagram. Randomized controlled trial design.

G-PNE: Percutaneous Needle Electrolysis Group. G-DN: Dry Needle Group.

Figure 2. Schedule for the enrolment and intervention.

Schedule for enrolment and intervention per cluster. -t1: baseline; t1–t2: intervention period; t2: 8 weeks after baseline; t3: 10 weeks after baseline; t4: 3 months after baseline. G-PNE: Percutaneous Needle Electrolysis Group; G-DN: Dry Needle Group; US: ultrasound.

1  
2  
3  
4  
5  
6  
7  
8  
9  
10  
11  
12  
13  
14  
15  
16  
17  
18  
19  
20  
21  
22  
23  
24  
25  
26  
27  
28  
29  
30  
31  
32  
33  
34  
35  
36  
37  
38  
39  
40  
41  
42  
43  
44  
45  
46  
47  
48  
49  
50  
51  
52  
53  
54  
55  
56  
57  
58  
59  
60

Figure 1. Flow diagram. Randomized controlled trial design.

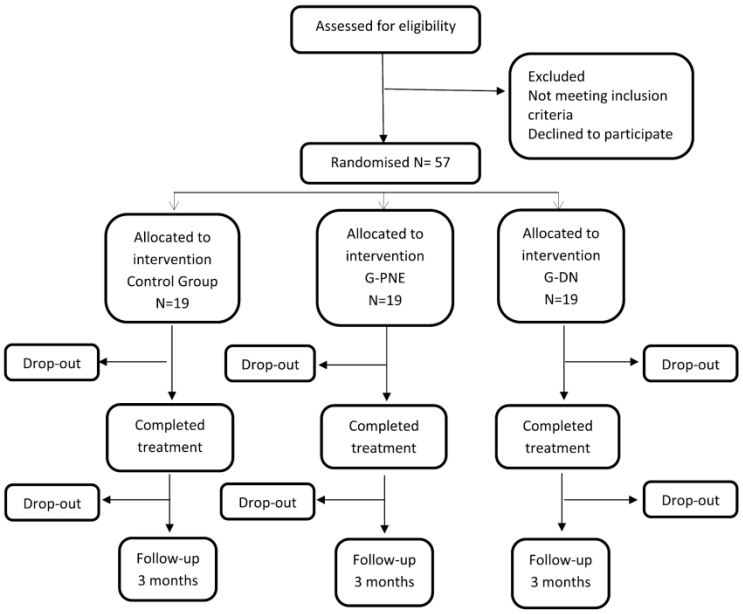

210x297mm (300 x 300 DPI)

Figure 2. Schedule for enrolment and intervention.

|                                         | Enrolment       | Allocation | Close-out      |                |                |                |
|-----------------------------------------|-----------------|------------|----------------|----------------|----------------|----------------|
| TIMEPOINT**                             | -t <sub>1</sub> | 0          | t <sub>1</sub> | t <sub>2</sub> | t <sub>3</sub> | t <sub>4</sub> |
| <b>ENROLMENT:</b>                       |                 |            |                |                |                |                |
| Eligibility screen                      | X               |            |                |                |                |                |
| Informed consent                        | X               |            |                |                |                |                |
| Allocation                              |                 | X          |                |                |                |                |
| <b>INTERVENTIONS:</b>                   |                 |            |                |                |                |                |
| <i>Control group</i>                    |                 |            | ↔              |                |                |                |
| <i>G-PNE</i>                            |                 |            | ↔              |                |                |                |
| <i>G-DN</i>                             |                 |            | ↔              |                |                |                |
| <b>ASSESSMENTS:</b>                     |                 |            |                |                |                |                |
| <i>Baseline demographic information</i> | X               |            |                |                |                |                |
| <i>VISA-P</i>                           | X               |            | X              |                | X              | X              |
| <i>VAS</i>                              |                 |            | X              |                | X              | X              |
| <i>SF-36</i>                            |                 |            | X              |                | X              | X              |
| <i>Tendon structure US</i>              |                 |            | X              |                | X              | X              |
| <i>Jump test</i>                        |                 |            | X              |                | X              | X              |

215x279mm (300 x 300 DPI)

## DOCUMENTO DE INFORMACIÓN AL PACIENTE

### Fecha:

**Título del proyecto:** “ESTUDIO COMPARATIVO ENTRE 3 TÉCNICAS DE PUNCIÓN PARA EL TRATAMIENTO DE LA TENDINOPATÍA CRÓNICA DEL TENDÓN ROTULIANO”

### Investigador principal:

Doña: M<sup>a</sup> Pilar López Royo

Este estudio se basa en el estudio comparativo de tres tratamientos que utilizan distintas técnicas de fisioterapia invasiva junto con un programa de ejercicio excéntrico para el tratamiento de la tendinopatía rotuliana. Por medio del tratamiento se produce una disminución del dolor asociado a esta patología y un aumento de la fuerza de la pierna, lo que a su vez hace que mejore la funcionalidad en las actividades de la vida diaria y mejore la calidad de vida.

### PROCESO DE SELECCIÓN DE PACIENTES

#### Criterios de inclusión:

- Edad comprendida entre 18 y 40 años.
- Practicar cualquier deporte de forma habitual.
- Pacientes con diagnóstico médico de tendinopatía rotuliana crónica con un mínimo de 3 meses de evolución y con sintomatología.
- Dolor a la palpación del tendón en el polo inferior de la rótula y durante el entrenamiento o competición.
- Puntuación del cuestionario VISA-P menor de 80 (el resultado obtenido de rellenar el cuestionario tiene que ser menor de 80 puntos de los 100 posibles para poder participar en el estudio).

#### Criterios de exclusión:

- Paciente operado de la rodilla afectada en los últimos 6 meses.
- Infiltraciones en la rodilla afectada en los últimos 3 meses.
- Paciente que ha recibido tratamiento farmacológico o fisioterápico en las últimas 48 horas o durante el estudio.
- Patología con menos de 3 meses de evolución.
- Presentar tendinopatía rotuliana bilateral.
- Puntuación del cuestionario VISA-p mayor o igual de 80 (el resultado obtenido de rellenar el cuestionario no puede ser igual o superar los 80 puntos de los 100 posibles, sino no podrá participar en el estudio).
- Imposibilidad para aplicar alguna de las técnicas de tratamiento o valoración por



1  
2            contraindicación absoluta o relativa.  
3  
4  
5  
6

## 7    **PROCEDIMIENTO**

8    El tratamiento consiste en realizar un protocolo de ejercicios excéntricos de cuádriceps que  
9    realizará en casa de forma diaria, y que serán revisados con el fisioterapeuta para valorar su  
10   correcta realización. Se complementará el tratamiento con la aplicación de una técnica de punción  
11   correcta realización. Se complementará el tratamiento con la aplicación de una técnica de punción  
12   según el protocolo de tratamiento propuesto de forma totalmente **aleatorizada** y según los  
13   criterios diagnósticos específicos de la misma, siguiendo las indicaciones, criterios de aplicación y  
14   criterios diagnósticos.  
15   criterios diagnósticos.

16   Son técnicas de punción cuyo objetivo es producir una respuesta inflamatoria aguda que active los  
17   mecanismos fisiológicos de regeneración del tejido y mejorar el dolor y la funcionalidad en la  
18   articulación de la rodilla, se realiza con agujas de punción seca, similares a las agujas de  
19   acupuntura y sin infiltrar ningún tipo de sustancia dentro del organismo.  
20   acupuntura y sin infiltrar ningún tipo de sustancia dentro del organismo.  
21  
22  
23  
24  
25

26   Los registros serán realizados en el Espacio de Valoración Funcional de la Universidad San Jorge,  
27   en la Facultad de Ciencias de la Salud, Edificio III. Se pondrá a su disposición la posibilidad de  
28   utilizar el autobús que utiliza el personal y alumnado de la universidad (en el horario que éste esté  
29   disponible). Las fechas y horarios serán convenidas con cada participante en función de su  
30   disponibilidad y la de los investigadores, buscando la conformidad de todos. La duración  
31   aproximada del estudio para cada paciente será de 30 minutos, aunque este horario podrá variar  
32   en función de los acontecimientos.  
33   en función de los acontecimientos.  
34  
35  
36  
37  
38

39   Será recibido por los miembros del equipo de investigación y una vez allí, se le realizará un primer  
40   análisis fisioterápico, rellenará una encuesta, una escala analógica visual (EVA) del dolor y el  
41   cuestionario Visa-p en el que se valorará la funcionalidad de la rodilla.  
42   cuestionario Visa-p en el que se valorará la funcionalidad de la rodilla.

43   Tras éste primer registro se le colocará un marcador pasivo en el pantalón. Se le pedirá que  
44   realice el siguiente protocolo:  
45   realice el siguiente protocolo:

- 46   - Calentamiento de 5 minutos en cinta a ritmo constante.
- 47   - Estiramientos dinámicos de psoas, cuádriceps, glúteo, gastrocnemios, isquiotibiales durante 5
- 48   minutos instruidos por el fisioterapeuta.
- 49   - Realización de los 3 saltos fuera de la plataforma durante 3 veces para que se familiarice con los
- 50   tests.
- 51   - En la plataforma de fuerzas realizará 3 test de salto: el test de Abalakov (ABK), el test de salto
- 52   con contramovimiento (CMJ) y el squatjump (SJ).
- 53   - En la plataforma de fuerzas realizará 3 test de salto: el test de Abalakov (ABK), el test de salto
- 54   con contramovimiento (CMJ) y el squatjump (SJ).
- 55   con contramovimiento (CMJ) y el squatjump (SJ).
- 56   con contramovimiento (CMJ) y el squatjump (SJ).
- 57   con contramovimiento (CMJ) y el squatjump (SJ).
- 58   con contramovimiento (CMJ) y el squatjump (SJ).
- 59   con contramovimiento (CMJ) y el squatjump (SJ).
- 60   con contramovimiento (CMJ) y el squatjump (SJ).

60   Se colocará en la plataforma y realizará 3 saltos de cada uno de los test con una separación entre  
ellos de 60 segundos.

Se valora el tendón por ecografía, y se recogen datos por medio de personal adiestrado y se envía

1 a personal especialista en radiodiagnóstico.

2  
3 Tras los registros de los saltos se dará por finalizada la valoración.

4  
5  
6 Tras la 1ª valoración, se realizará una división en tres grupos de los pacientes de forma  
7 aleatorizada.

8  
9 Se le realizará el protocolo de tratamiento de fisioterapia invasiva que le haya correspondido.  
10 Realizará una sesión del tratamiento cada 14 días, y se realizará la 2ª valoración 1 semana más  
11 tarde de la 4ª sesión de punción para valorar los cambios que se hayan producido tras el  
12 tratamiento, repitiéndose de nuevo el proceso de recogida de datos realizado al inicio del estudio.  
13 Se realizará un seguimiento a los tres meses de la valoración post-tratamiento para valorar la  
14 eficacia de la técnica a largo plazo del tratamiento.

15  
16 El procedimiento se realizará guiado ecográficamente para asegurar la especificidad de aplicación  
17 sobre la zona relevante de tratamiento y garantizar la seguridad de la técnica. Se hace posterior a  
18 esta intervención una serie de ejercicios excéntricos de cuádriceps. El tratamiento se realizará  
19 durante 4 sesiones (a razón de una sesión cada 14 días).

## 20 21 22 **RIESGOS**

23 La aplicación de las técnicas de punción utilizadas no han demostrado tener ningún efecto  
24 secundario hasta la fecha, aunque el paciente puede experimentar dolor durante y tras la punción,  
25 generalmente de uno o dos días de duración.

## 26 27 28 **RESPONSABILIDADES DEL PARTICIPANTE**

29 La información que usted posea sobre su estado de salud o sobre sensaciones previas  
30 anormales al realizarle una punción, puede afectar la seguridad o el valor de estas pruebas. La  
31 rápida comunicación por su parte de las sensaciones que experimenta al realizar esta prueba es  
32 también de gran importancia. Usted es responsable de revelar esa información al personal de la  
33 prueba cuando se le pregunte.

## 34 35 36 **PREGUNTAS**

37 Le animamos a que haga cualquier pregunta sobre los procedimientos seguidos o sus resultados  
38 en la prueba. Si tiene alguna preocupación o pregunta, por favor pídaenos más información, para  
39 ello le dejamos un correo electrónico [mapilr86@hotmail.com](mailto:mapilr86@hotmail.com) y un número de teléfono móvil:  
40 616102365.

## 41 42 43 **LIBERTAD PARA DAR EL CONSENTIMIENTO**

44 Usted participa en el estudio de manera voluntaria, pudiendo abandonarlo en el momento  
45 que considere oportuno, sin que esto conlleve ninguna repercusión negativa para usted.

46 Los datos obtenidos en el estudio serán confidenciales y únicamente se hará uso de ellos

1  
2 para el cumplimiento de los objetivos planteados en la investigación. No se cederán estos datos a  
3 terceros sin el consentimiento expreso de los sujetos participantes a quienes pertenezcan los  
4 datos.  
5

6 En esta investigación se garantizará el anonimato de los sujetos que aportan los datos,  
7 estableciendo un código disociado para identificarlos que sólo será conocido por los responsables  
8 de la realización del trabajo de campo.  
9  
10  
11  
12  
13  
14  
15  
16

17 Fdo: M<sup>a</sup> Pilar López Royo  
18  
19  
20  
21  
22  
23  
24  
25  
26  
27  
28  
29  
30  
31  
32  
33  
34  
35  
36  
37  
38  
39  
40  
41  
42  
43  
44  
45  
46  
47  
48  
49  
50  
51  
52  
53  
54  
55  
56  
57  
58  
59  
60

## MODELO DE CONSENTIMIENTO INFORMADO

Título del PROYECTO: “ESTUDIO COMPARATIVO ENTRE 3 TÉCNICAS DE PUNCIÓN PARA EL TRATAMIENTO DE LA TENDINOPATÍA CRÓNICA DEL TENDÓN ROTULIANO”

Doña: M<sup>a</sup> Pilar López Royo ([mapilr86@hotmail.com](mailto:mapilr86@hotmail.com))  
Departamento de Fisiatría y Enfermería  
UNIVERSIDAD DE ZARAGOZA

Yo, ..... (nombre y apellidos del participante)

He recibido suficiente información en relación con el proyecto, he leído la hoja de información que se me ha entregado y he podido hacer preguntas sobre el proyecto, recibiendo respuestas satisfactorias.

Entiendo que la participación es voluntaria y que puedo abandonar el proyecto:

- . Cuando lo desee
- . Sin tener que dar explicaciones
- . Sin que esto repercuta en mis cuidados médicos

He sido claramente informado de forma clara y precisa del tratado que recibirán mis datos personales que se contienen en este proyecto, sabiendo que los datos serán tratados y custodiados bajo mi intimidad y a la vigente normativa de la protección de datos, y que sobre estos datos me asisten los derechos de rectificación, acceso y oposición comunicándolo al investigador principal que figura en este consentimiento.

Declaro que presto libremente mi conformidad para participar en el estudio.

Deseo ser informado sobre los resultados del estudio:      sí      no      (marque lo que proceda)

Así pues, acepto que las muestras derivadas de este proyecto puedan ser utilizadas en futuras investigaciones siempre y cuando están relacionadas con ésta.

Por lo tanto, doy mi conformidad para que mis datos clínicos sean revisados por personal ajeno al centro, para los fines del estudio, y soy consciente de que este consentimiento es

1  
2 revocable.  
3  
4  
5  
6

7 Firma del participante:

8 \_\_\_\_\_  
9

10 Fecha:

11 \_\_\_\_\_  
12  
13  
14  
15  
16

17 He explicado la naturaleza y el propósito del proyecto al paciente mencionado  
18  
19

20  
21 Firma del Investigador:

22 \_\_\_\_\_  
23

24 Fecha:

25 \_\_\_\_\_  
26  
27  
28  
29

30  
31 Consentimiento informado estudio \_\_\_\_\_

32 Versión \_\_\_\_\_, fecha \_\_\_\_\_  
33  
34  
35  
36  
37  
38  
39  
40  
41  
42  
43  
44  
45  
46  
47  
48  
49  
50  
51  
52  
53  
54  
55  
56  
57  
58  
59  
60

1  
2  
3 **Appendix 2. Checklist SPIRIT**  
4

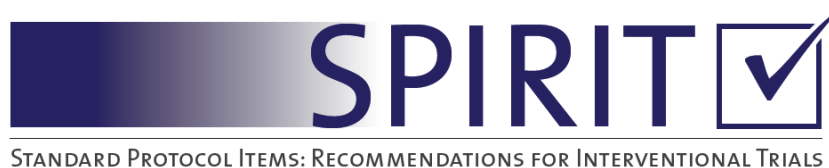

26  
27  
28  
29  
30  
31  
32  
33  
34  
35  
36  
37  
38  
39  
40  
41  
42  
43  
44  
45  
46  
47  
48  
49  
50  
51  
52  
53

6 SPIRIT 2013 Checklist: Recommended items to address in a clinical trial protocol and  
7 related documents\*

| Section/item                      | Item No | Description                                                                                                                                                                                                                                                                              | Addressed on page number |
|-----------------------------------|---------|------------------------------------------------------------------------------------------------------------------------------------------------------------------------------------------------------------------------------------------------------------------------------------------|--------------------------|
| <b>Administrative information</b> |         |                                                                                                                                                                                                                                                                                          |                          |
| Title                             | 1       | Descriptive title identifying the study design, population, interventions, and, if applicable, trial acronym                                                                                                                                                                             | 1                        |
| Trial registration                | 2a      | Trial identifier and registry name. If not yet registered, name of intended registry                                                                                                                                                                                                     | 1-3                      |
|                                   | 2b      | All items from the World Health Organization Trial Registration Data Set                                                                                                                                                                                                                 | 2-3                      |
| Protocol version                  | 3       | Date and version identifier                                                                                                                                                                                                                                                              | N/A                      |
| Funding                           | 4       | Sources and types of financial, material, and other support                                                                                                                                                                                                                              | 22                       |
| Roles and responsibilities        | 5a      | Names, affiliations, and roles of protocol contributors                                                                                                                                                                                                                                  | 22                       |
|                                   | 5b      | Name and contact information for the trial sponsor                                                                                                                                                                                                                                       | 22                       |
|                                   | 5c      | Role of study sponsor and funders, if any, in study design; collection, management, analysis, and interpretation of data; writing of the report; and the decision to submit the report for publication, including whether they will have ultimate authority over any of these activities | N/A                      |
|                                   | 5d      | Composition, roles, and responsibilities of the coordinating centre, steering committee, endpoint adjudication committee, data management team, and other individuals or groups overseeing the trial, if applicable (see Item 21a for data monitoring committee)                         | N/A                      |
| <b>Introduction</b>               |         |                                                                                                                                                                                                                                                                                          |                          |
| Background and rationale          | 6a      | Description of research question and justification for undertaking the trial, including summary of relevant studies (published and unpublished) examining benefits and harms for each intervention                                                                                       | 3-5                      |
|                                   | 6b      | Explanation for choice of comparators                                                                                                                                                                                                                                                    | 3-5                      |
| Objectives                        | 7       | Specific objectives or hypotheses                                                                                                                                                                                                                                                        | 5-6                      |

|                                                                     |     |                                                                                                                                                                                                                                                                                                                                                                                |       |
|---------------------------------------------------------------------|-----|--------------------------------------------------------------------------------------------------------------------------------------------------------------------------------------------------------------------------------------------------------------------------------------------------------------------------------------------------------------------------------|-------|
| Trial design                                                        | 8   | Description of trial design including type of trial (eg, parallel group, crossover, factorial, single group), allocation ratio, and framework (eg, superiority, equivalence, noninferiority, exploratory)                                                                                                                                                                      | 6     |
| <b>Methods: Participants, interventions, and outcomes</b>           |     |                                                                                                                                                                                                                                                                                                                                                                                |       |
| Study setting                                                       | 9   | Description of study settings (eg, community clinic, academic hospital) and list of countries where data will be collected. Reference to where list of study sites can be obtained                                                                                                                                                                                             | 6     |
| Eligibility criteria                                                | 10  | Inclusion and exclusion criteria for participants. If applicable, eligibility criteria for study centres and individuals who will perform the interventions (eg, surgeons, psychotherapists)                                                                                                                                                                                   | 7     |
| Interventions                                                       | 11a | Interventions for each group with sufficient detail to allow replication, including how and when they will be administered                                                                                                                                                                                                                                                     | 7-9   |
|                                                                     | 11b | Criteria for discontinuing or modifying allocated interventions for a given trial participant (eg, drug dose change in response to harms, participant request, or improving/worsening disease)                                                                                                                                                                                 | N/A   |
|                                                                     | 11c | Strategies to improve adherence to intervention protocols, and any procedures for monitoring adherence (eg, drug tablet return, laboratory tests)                                                                                                                                                                                                                              | 8     |
|                                                                     | 11d | Relevant concomitant care and interventions that are permitted or prohibited during the trial                                                                                                                                                                                                                                                                                  | 8     |
| Outcomes                                                            | 12  | Primary, secondary, and other outcomes, including the specific measurement variable (eg, systolic blood pressure), analysis metric (eg, change from baseline, final value, time to event), method of aggregation (eg, median, proportion), and time point for each outcome. Explanation of the clinical relevance of chosen efficacy and harm outcomes is strongly recommended | 9-11  |
| Participant timeline                                                | 13  | Time schedule of enrolment, interventions (including any run-ins and washouts), assessments, and visits for participants. A schematic diagram is highly recommended (see Figure)                                                                                                                                                                                               | 11    |
| Sample size                                                         | 14  | Estimated number of participants needed to achieve study objectives and how it was determined, including clinical and statistical assumptions supporting any sample size calculations                                                                                                                                                                                          | 11-12 |
| Recruitment                                                         | 15  | Strategies for achieving adequate participant enrolment to reach target sample size                                                                                                                                                                                                                                                                                            | 12    |
| <b>Methods: Assignment of interventions (for controlled trials)</b> |     |                                                                                                                                                                                                                                                                                                                                                                                |       |
| Allocation:                                                         |     |                                                                                                                                                                                                                                                                                                                                                                                |       |
| Sequence generation                                                 | 16a | Method of generating the allocation sequence (eg, computer-generated random numbers), and list of any factors for stratification. To reduce predictability of a random sequence, details of any planned restriction (eg, blocking) should be provided in a separate document that is unavailable to those who enrol participants or assign interventions                       | 12-13 |
| Allocation concealment mechanism                                    | 16b | Mechanism of implementing the allocation sequence (eg, central telephone; sequentially numbered, opaque, sealed envelopes), describing any steps to conceal the sequence until interventions are assigned                                                                                                                                                                      | 12-13 |

|    |                                                           |     |                                                                                                                                                                                                                                                                                                                                                                                                              |       |
|----|-----------------------------------------------------------|-----|--------------------------------------------------------------------------------------------------------------------------------------------------------------------------------------------------------------------------------------------------------------------------------------------------------------------------------------------------------------------------------------------------------------|-------|
| 1  |                                                           |     |                                                                                                                                                                                                                                                                                                                                                                                                              |       |
| 2  |                                                           |     |                                                                                                                                                                                                                                                                                                                                                                                                              |       |
| 3  |                                                           |     |                                                                                                                                                                                                                                                                                                                                                                                                              |       |
| 4  | Implemen                                                  | 16c | Who will generate the allocation sequence, who will enrol participants, and who will assign participants to interventions                                                                                                                                                                                                                                                                                    | 13    |
| 5  | tation                                                    |     |                                                                                                                                                                                                                                                                                                                                                                                                              |       |
| 6  | Blinding                                                  | 17a | Who will be blinded after assignment to interventions (eg, trial participants, care providers, outcome assessors, data analysts), and how                                                                                                                                                                                                                                                                    | 13    |
| 7  | (masking)                                                 |     |                                                                                                                                                                                                                                                                                                                                                                                                              |       |
| 8  |                                                           | 17b | If blinded, circumstances under which unblinding is permissible, and procedure for revealing a participant's allocated intervention during the trial                                                                                                                                                                                                                                                         | 13    |
| 9  |                                                           |     |                                                                                                                                                                                                                                                                                                                                                                                                              |       |
| 10 |                                                           |     |                                                                                                                                                                                                                                                                                                                                                                                                              |       |
| 11 |                                                           |     |                                                                                                                                                                                                                                                                                                                                                                                                              |       |
| 12 |                                                           |     |                                                                                                                                                                                                                                                                                                                                                                                                              |       |
| 13 | <b>Methods: Data collection, management, and analysis</b> |     |                                                                                                                                                                                                                                                                                                                                                                                                              |       |
| 14 |                                                           |     |                                                                                                                                                                                                                                                                                                                                                                                                              |       |
| 15 | Data                                                      | 18a | Plans for assessment and collection of outcome, baseline, and other trial data, including any related processes to promote data quality (eg, duplicate measurements, training of assessors) and a description of study instruments (eg, questionnaires, laboratory tests) along with their reliability and validity, if known. Reference to where data collection forms can be found, if not in the protocol | 13-14 |
| 16 | collection                                                |     |                                                                                                                                                                                                                                                                                                                                                                                                              |       |
| 17 | methods                                                   |     |                                                                                                                                                                                                                                                                                                                                                                                                              |       |
| 18 |                                                           | 18b | Plans to promote participant retention and complete follow-up, including list of any outcome data to be collected for participants who discontinue or deviate from intervention protocols                                                                                                                                                                                                                    | N/A   |
| 19 |                                                           |     |                                                                                                                                                                                                                                                                                                                                                                                                              |       |
| 20 |                                                           |     |                                                                                                                                                                                                                                                                                                                                                                                                              |       |
| 21 |                                                           |     |                                                                                                                                                                                                                                                                                                                                                                                                              |       |
| 22 |                                                           |     |                                                                                                                                                                                                                                                                                                                                                                                                              |       |
| 23 | Data                                                      | 19  | Plans for data entry, coding, security, and storage, including any related processes to promote data quality (eg, double data entry; range checks for data values). Reference to where details of data management procedures can be found, if not in the protocol                                                                                                                                            | 14    |
| 24 | management                                                |     |                                                                                                                                                                                                                                                                                                                                                                                                              |       |
| 25 |                                                           |     |                                                                                                                                                                                                                                                                                                                                                                                                              |       |
| 26 |                                                           |     |                                                                                                                                                                                                                                                                                                                                                                                                              |       |
| 27 |                                                           |     |                                                                                                                                                                                                                                                                                                                                                                                                              |       |
| 28 |                                                           |     |                                                                                                                                                                                                                                                                                                                                                                                                              |       |
| 29 |                                                           |     |                                                                                                                                                                                                                                                                                                                                                                                                              |       |
| 30 | Statistical                                               | 20a | Statistical methods for analysing primary and secondary outcomes. Reference to where other details of the statistical analysis plan can be found, if not in the protocol                                                                                                                                                                                                                                     | 14    |
| 31 | methods                                                   |     |                                                                                                                                                                                                                                                                                                                                                                                                              |       |
| 32 |                                                           | 20b | Methods for any additional analyses (eg, subgroup and adjusted analyses)                                                                                                                                                                                                                                                                                                                                     | 14    |
| 33 |                                                           |     |                                                                                                                                                                                                                                                                                                                                                                                                              |       |
| 34 |                                                           | 20c | Definition of analysis population relating to protocol non-adherence (eg, as randomised analysis), and any statistical methods to handle missing data (eg, multiple imputation)                                                                                                                                                                                                                              | 14    |
| 35 |                                                           |     |                                                                                                                                                                                                                                                                                                                                                                                                              |       |
| 36 |                                                           |     |                                                                                                                                                                                                                                                                                                                                                                                                              |       |
| 37 |                                                           |     |                                                                                                                                                                                                                                                                                                                                                                                                              |       |
| 38 |                                                           |     |                                                                                                                                                                                                                                                                                                                                                                                                              |       |
| 39 | <b>Methods: Monitoring</b>                                |     |                                                                                                                                                                                                                                                                                                                                                                                                              |       |
| 40 |                                                           |     |                                                                                                                                                                                                                                                                                                                                                                                                              |       |
| 41 |                                                           |     |                                                                                                                                                                                                                                                                                                                                                                                                              |       |
| 42 | Data                                                      | 21a | Composition of data monitoring committee (DMC); summary of its role and reporting structure; statement of whether it is independent from the sponsor and competing interests; and reference to where further details about its charter can be found, if not in the protocol. Alternatively, an explanation of why a DMC is not needed                                                                        | -     |
| 43 | monitoring                                                |     |                                                                                                                                                                                                                                                                                                                                                                                                              |       |
| 44 |                                                           | 21b | Description of any interim analyses and stopping guidelines, including who will have access to these interim results and make the final decision to terminate the trial                                                                                                                                                                                                                                      | -     |
| 45 |                                                           |     |                                                                                                                                                                                                                                                                                                                                                                                                              |       |
| 46 |                                                           |     |                                                                                                                                                                                                                                                                                                                                                                                                              |       |
| 47 |                                                           |     |                                                                                                                                                                                                                                                                                                                                                                                                              |       |
| 48 |                                                           |     |                                                                                                                                                                                                                                                                                                                                                                                                              |       |
| 49 |                                                           |     |                                                                                                                                                                                                                                                                                                                                                                                                              |       |
| 50 |                                                           |     |                                                                                                                                                                                                                                                                                                                                                                                                              |       |
| 51 | Harms                                                     | 22  | Plans for collecting, assessing, reporting, and managing solicited and spontaneously reported adverse events and other unintended effects of trial interventions or trial conduct                                                                                                                                                                                                                            | -     |
| 52 |                                                           |     |                                                                                                                                                                                                                                                                                                                                                                                                              |       |
| 53 |                                                           |     |                                                                                                                                                                                                                                                                                                                                                                                                              |       |
| 54 | Auditing                                                  | 23  | Frequency and procedures for auditing trial conduct, if any, and whether the process will be independent from investigators and the sponsor                                                                                                                                                                                                                                                                  | N/A   |
| 55 |                                                           |     |                                                                                                                                                                                                                                                                                                                                                                                                              |       |
| 56 |                                                           |     |                                                                                                                                                                                                                                                                                                                                                                                                              |       |
| 57 |                                                           |     |                                                                                                                                                                                                                                                                                                                                                                                                              |       |
| 58 | <b>Ethics and dissemination</b>                           |     |                                                                                                                                                                                                                                                                                                                                                                                                              |       |
| 59 |                                                           |     |                                                                                                                                                                                                                                                                                                                                                                                                              |       |
| 60 |                                                           |     |                                                                                                                                                                                                                                                                                                                                                                                                              |       |



|                               |     |                                                                                                                                                                                                                                                                                     |     |
|-------------------------------|-----|-------------------------------------------------------------------------------------------------------------------------------------------------------------------------------------------------------------------------------------------------------------------------------------|-----|
| Research ethics approval      | 24  | Plans for seeking research ethics committee/institutional review board (REC/IRB) approval                                                                                                                                                                                           | 15  |
| Protocol amendments           | 25  | Plans for communicating important protocol modifications (eg, changes to eligibility criteria, outcomes, analyses) to relevant parties (eg, investigators, REC/IRBs, trial participants, trial registries, journals, regulators)                                                    | 15  |
| Consent or assent             | 26a | Who will obtain informed consent or assent from potential trial participants or authorised surrogates, and how (see Item 32)                                                                                                                                                        | 15  |
|                               | 26b | Additional consent provisions for collection and use of participant data and biological specimens in ancillary studies, if applicable                                                                                                                                               |     |
| Confidentiality               | 27  | How personal information about potential and enrolled participants will be collected, shared, and maintained in order to protect confidentiality before, during, and after the trial                                                                                                | 15  |
| Declaration of interests      | 28  | Financial and other competing interests for principal investigators for the overall trial and each study site                                                                                                                                                                       |     |
| Access to data                | 29  | Statement of who will have access to the final trial dataset, and disclosure of contractual agreements that limit such access for investigators                                                                                                                                     | 15  |
| Ancillary and post-trial care | 30  | Provisions, if any, for ancillary and post-trial care, and for compensation to those who suffer harm from trial participation                                                                                                                                                       | -   |
| Dissemination policy          | 31a | Plans for investigators and sponsor to communicate trial results to participants, healthcare professionals, the public, and other relevant groups (eg, via publication, reporting in results databases, or other data sharing arrangements), including any publication restrictions | -   |
|                               | 31b | Authorship eligibility guidelines and any intended use of professional writers                                                                                                                                                                                                      |     |
|                               | 31c | Plans, if any, for granting public access to the full protocol, participant-level dataset, and statistical code                                                                                                                                                                     |     |
| <b>Appendices</b>             |     |                                                                                                                                                                                                                                                                                     |     |
| Informed consent materials    | 32  | Model consent form and other related documentation given to participants and authorised surrogates                                                                                                                                                                                  | N/A |
| Biological specimens          | 33  | Plans for collection, laboratory evaluation, and storage of biological specimens for genetic or molecular analysis in the current trial and for future use in ancillary studies, if applicable                                                                                      | N/A |

8

# BMJ Open

## A comparative study of three treatment interventions for patellar tendinopathy: a protocol for a randomized controlled trial

|                                 |                                                                                                                                                                                                                                                                                                                                                                                                                                                                                                                                                                                                                                                                                                                                                                                                                                                |
|---------------------------------|------------------------------------------------------------------------------------------------------------------------------------------------------------------------------------------------------------------------------------------------------------------------------------------------------------------------------------------------------------------------------------------------------------------------------------------------------------------------------------------------------------------------------------------------------------------------------------------------------------------------------------------------------------------------------------------------------------------------------------------------------------------------------------------------------------------------------------------------|
| Journal:                        | <i>BMJ Open</i>                                                                                                                                                                                                                                                                                                                                                                                                                                                                                                                                                                                                                                                                                                                                                                                                                                |
| Manuscript ID                   | bmjopen-2019-034304.R2                                                                                                                                                                                                                                                                                                                                                                                                                                                                                                                                                                                                                                                                                                                                                                                                                         |
| Article Type:                   | Protocol                                                                                                                                                                                                                                                                                                                                                                                                                                                                                                                                                                                                                                                                                                                                                                                                                                       |
| Date Submitted by the Author:   | 08-Jan-2020                                                                                                                                                                                                                                                                                                                                                                                                                                                                                                                                                                                                                                                                                                                                                                                                                                    |
| Complete List of Authors:       | Lopez-Royo, Maria Pilar; Universidad San Jorge Facultad de Ciencias de la Salud; Universidad de Zaragoza, Facultad de Ciencias de la Salud y del Deporte<br>Gómez-Trullén, Eva Maria; Universidad de Zaragoza, Facultad de Ciencias de la Salud y del Deporte<br>Ortiz-Lucas, Maria; Universidad San Jorge Facultad de Ciencias de la Salud<br>Galán-Díaz, Rita Maria; Universidad San Jorge Facultad de Ciencias de la Salud<br>Bataller-Cervero, Ana Vanessa; Universidad San Jorge Facultad de Ciencias de la Salud<br>Al-Boloushi, Zaid; Universidad de Zaragoza Facultad de Ciencias, Facultad de Ciencias de la Salud y del Deporte; Kuwait Ministry of Health<br>Hamam-Alcober, Yasmina; Universidad San Jorge Facultad de Ciencias de la Salud, Fisioterapia<br>Herrero, Pablo; Universidad San Jorge Facultad de Ciencias de la Salud |
| <b>Primary Subject Heading</b>: | Rehabilitation medicine                                                                                                                                                                                                                                                                                                                                                                                                                                                                                                                                                                                                                                                                                                                                                                                                                        |
| Secondary Subject Heading:      | Sports and exercise medicine, Pathology                                                                                                                                                                                                                                                                                                                                                                                                                                                                                                                                                                                                                                                                                                                                                                                                        |
| Keywords:                       | Eccentric Exercise, Tendinopathy, Percutaneous Needle Electrolysis, Dry Needling                                                                                                                                                                                                                                                                                                                                                                                                                                                                                                                                                                                                                                                                                                                                                               |
|                                 |                                                                                                                                                                                                                                                                                                                                                                                                                                                                                                                                                                                                                                                                                                                                                                                                                                                |

SCHOLARONE™  
Manuscripts



I, the Submitting Author has the right to grant and does grant on behalf of all authors of the Work (as defined in the below author licence), an exclusive licence and/or a non-exclusive licence for contributions from authors who are: i) UK Crown employees; ii) where BMJ has agreed a CC-BY licence shall apply, and/or iii) in accordance with the terms applicable for US Federal Government officers or employees acting as part of their official duties; on a worldwide, perpetual, irrevocable, royalty-free basis to BMJ Publishing Group Ltd ("BMJ") its licensees and where the relevant Journal is co-owned by BMJ to the co-owners of the Journal, to publish the Work in this journal and any other BMJ products and to exploit all rights, as set out in our [licence](#).

The Submitting Author accepts and understands that any supply made under these terms is made by BMJ to the Submitting Author unless you are acting as an employee on behalf of your employer or a postgraduate student of an affiliated institution which is paying any applicable article publishing charge ("APC") for Open Access articles. Where the Submitting Author wishes to make the Work available on an Open Access basis (and intends to pay the relevant APC), the terms of reuse of such Open Access shall be governed by a Creative Commons licence – details of these licences and which [Creative Commons](#) licence will apply to this Work are set out in our licence referred to above.

Other than as permitted in any relevant BMJ Author's Self Archiving Policies, I confirm this Work has not been accepted for publication elsewhere, is not being considered for publication elsewhere and does not duplicate material already published. I confirm all authors consent to publication of this Work and authorise the granting of this licence.

A comparative study of three treatment interventions for patellar tendinopathy: a  
protocol for a randomized controlled trial

López-Royo MP<sup>a,b</sup>, Gómez-Trullén EM<sup>b</sup>, Ortiz-Lucas M<sup>a</sup>, Galán-Díaz RM<sup>a</sup>, Bataller-Cervero  
AV<sup>a</sup>, Al-Boloushi Z<sup>b,c</sup>, Hamam-Alcober Y<sup>a</sup>, Herrero P<sup>a\*</sup>

## AFFILIATIONS

- A.** iPhysio Research Group. Universidad San Jorge. Campus Universitario, Autov. A23 km 299, 50830. Villanueva de Gállego, Zaragoza, Spain.
- B.** Universidad de Zaragoza. Facultad de Ciencias de la Salud y del Deporte. Dpto. de Fisiatría y Enfermería. C/ Domingo Miral s/n, 50009 - Zaragoza, Spain.
- A.** Ministry of Health, State of Kuwait. Jamal Abdunnasser Street, Al Solaibeykhat Area 5. Kuwait City. Safat 13001.

## \*CORRESPONDENCE TO:

Dr. Pablo Herrero. iPhysio Research Group. Universidad San Jorge. Campus Universitario, Autov A23, Km 299, 50830 Villanueva de Gállego, Zaragoza, Spain.  
Tel.: (+34) 976 060 100 Fax: 976 077 581. Email: pherrero@usj.es

## ADDITIONAL AUTHOR INFORMATION

Maria Pilar López Royo. Emails: mplopez@usj.es

Eva María Gómez Trullén. Email: evagomez@unizar.es

María Ortiz Lucas. Email: mariaortizlucas@gmail.com

Rita María Galán Díaz. Email: rmgalan@usj.es

Ana Vanessa Bataller-Cervero. Email: avbataller@usj.es

1  
2  
3 Yasmina Hamam-Alcober. Email: yhamam@usj.es  
4  
5

6 Zaid AL-boloushi. Email: boloushi@me.com  
7  
8  
9

10  
11  
12 **WORD COUNT:** 3985 words.  
13  
14  
15

## 16 17 **ABSTRACT**

18  
19 **Introduction:** Patellar tendinopathy is a degenerative disease of the patellar tendon,  
20 which affects athletes from a variety of sports, and is especially predominant in sports  
21 involving high-impact jumping. The aim of this study is to compare the effectiveness of  
22 three therapies in order to determine the most effective treatment protocol of patellar  
23 tendinopathy.  
24  
25  
26  
27  
28  
29

30  
31 **Methods and analysis:** This study is a randomized controlled trial with blinded  
32 participants. Measurements will be carried out by a specially trained blinded assessor. A  
33 sample of 57 patients with a medical diagnosis of patellar tendinopathy will participate  
34 in this study and will be divided into three treatment groups. Eligible participants will be  
35 randomly allocated to receive either: (a) treatment group with Percutaneous Needle  
36 Electrolysis, (b) treatment group with Dry Needling or (c) treatment group with placebo  
37 needling. In addition, all groups will perform eccentric exercise. Functionality and muscle  
38 strength parameters, pain, ultrasound appearances and patient perceived quality of life  
39 shall be evaluated using the VISA-p, jump test, VAS, US images and SF-36, respectively.  
40  
41  
42  
43  
44  
45  
46  
47  
48  
49  
50  
51  
52  
53  
54  
55  
56  
57  
58  
59  
60  
Participants will be assessed at baseline, at 10 weeks and at 22 weeks after baseline. The  
expected findings will allow us to advance in the treatment of this injury, as they will help  
determine whether a needling intervention has additional effects on an eccentric exercise  
program and whether any of the needling modalities is more effective than the other.

1  
2  
3 **Ethics and dissemination:** This protocol has been approved by the Ethics Committee of  
4 Aragon (N° PI15/0017). The trial will be conducted in accordance with the Declaration  
5 of Helsinki.  
6  
7  
8

9 **Trial Registration Number:** NCT02498795.  
10  
11  
12

### 13 **Strengths and limitations of this study**

- 14  
15  
16  
17 - This randomized clinical trial will report the effects on functionality and pain of three  
18 different treatment interventions in both the short and long term.  
19  
20  
21 - The double-blinded and placebo-control design will enhance objectivity and help reduce  
22 bias.  
23  
24  
25 - The effects of two minimally invasive treatments in physical therapy will be compared  
26 for the first time in patellar tendinopathy.  
27  
28  
29  
30  
31  
32

## 33 **INTRODUCTION**

34  
35 Patellar tendinopathy (PT), also known as jumper's knee, is a degenerative condition  
36 affecting the patellar tendon resulting in anterior knee pain associated with focal and  
37 palpable tenderness at the inferior pole of the patella. This disorder has similar histologic  
38 findings to other tendon disorders characterized by an increased thickness of the tendon  
39 and changes in vascularity, and cellularity, with incompletely healed tendon micro-  
40 ruptures and disturbed collagen distribution(1).  
41  
42  
43  
44  
45  
46  
47  
48

49 This degenerative condition affects athletes from a variety of sports, and is especially  
50 predominant in sports involving high-impact jumping. The overall prevalence of PT in  
51 non-elite players is 8.5%, although this figure increases in sports that place high demands  
52 on the patellar ligament, increasing up to 14.2% in volleyball athletes. Among elite  
53 volleyball and basketball players, a prevalence of 45% and 32%, respectively, has been  
54  
55  
56  
57  
58  
59  
60

1  
2  
3 reported. In addition, jumper's knee is almost twice as common among male non-elite  
4 athletes when compared with female athletes(2).  
5

6  
7 The diagnosis is typically based on the clinical history and symptomatic findings.  
8  
9 Currently, imaging techniques, such as color-Doppler ultrasound (CD-US) and gray scale  
10 ultrasound (GS-US) can be used for the assessment of the patellar tendon to clinically  
11 confirm the diagnosis(3).  
12  
13  
14

15  
16 Treatments used for PT fall into two major groups. The first group comprises medical  
17 treatments which include non-steroidal anti-inflammatory drugs (NSAIDs), platelet-rich  
18 plasma injection(4) and autologous growth factors(5). The second group consists of  
19 physical therapies, including both conservative and invasive approaches (needling  
20 techniques).  
21  
22  
23  
24  
25  
26  
27

28  
29 Conservative therapies are generally accepted as the first line of approach for managing  
30 PT(6, 7), considering exercise as the gold standard of treatment, either eccentric exercise  
31 (EE) or high slow resistance training programs. Both have demonstrated similar  
32 effectiveness in the treatment of PT(6-8). In 2012, EE was shown to be effective in the  
33 treatment of tendinopathies at various locations of the body, including PT, with a greater  
34 likelihood of clinical improvement when performed on a declined surface(6, 8, 9). In  
35 recent years, further evidence now supports the fact that exercise is more effective than  
36 other conventional treatments in tendinopathy, such as iontophoresis, US, Cyriax  
37 treatment, etc.(10).  
38  
39  
40  
41  
42  
43  
44  
45  
46  
47  
48

49  
50 Physical therapy approaches for PT continue to evolve and a number of innovative  
51 treatment options are now available, such as dry needling (DN)(11), electrotherapeutic  
52 invasive modalities (e.g. electrolysis)(12-14) and extracorporeal shockwave (ECSW)  
53 therapy(15). Recently, research has focused on regenerative therapies with high  
54 expectations of success because some of these techniques seem to achieve a rapid  
55  
56  
57  
58  
59  
60

1  
2  
3 regeneration of the injured tendon(11, 12, 16). However, evidence-based regenerative  
4 therapies are limited and there is no agreement to date regarding which of these is the  
5 most effective(17). DN consists of the insertion of a needle (filiform and solid, non-  
6 beveled) with the aim of provoking a local injury leading to an inflammatory response  
7 and the subsequent regeneration of the injured area in approximately one week. A study  
8 performed by Abat et al. reported that DN induced histological and mechanical changes  
9 in rat Achilles tendons at week one, with changes persisting at week four(18).  
10 Percutaneous Needle Electrolysis (PNE) is an ultrasound-guided technique used by  
11 physiotherapists consisting of causing localized lysis in the damaged and/or degenerated  
12 tissue by means of a galvanic current transmitted through an acupuncture needle. This  
13 technique may affect inflammatory mediators in damaged muscle tissue and influence the  
14 new vascularization of the injured area in rats(18). James et al.(11) carried out a cohort  
15 study in humans analyzing one group treated with DN and another treated with autologous  
16 blood injections. In both cases, they found improvements compared to the baseline  
17 measurements. However, this study failed to find differences between the different  
18 treatments, concluding that both techniques were equally effective. In relation to PNE, a  
19 former study(14) analyzed the treatment effect of electrolysis applied once a week in a  
20 group of patients without any control or comparative group, reporting that patients  
21 obtained statistically and clinically significant improvements compared to baseline  
22 measurements.

23  
24 From a biological point of view, it seems reasonable to hypothesize that a patient will  
25 obtain benefits thanks to the mechanical effects provided by the needle(16), and that  
26 patients may benefit more if the electrolysis effect is added to the mechanical stimuli  
27 provided by the needle(19).  
28  
29  
30  
31  
32  
33  
34  
35  
36  
37  
38  
39  
40  
41  
42  
43  
44  
45  
46  
47  
48  
49  
50  
51  
52  
53  
54  
55  
56  
57  
58  
59  
60



1  
2  
3 Therefore, the aim of this study is to determine which intervention is the most effective,  
4 and whether invasive techniques have additional effects for the treatment of PT when  
5 compared with EE alone. Moreover, whether the application of PNE provides any  
6 additional benefits aside from performing DN alone, in the short and long term.  
7  
8  
9  
10  
11  
12  
13  
14

## 15 **METHODS AND ANALYSIS**

### 16 **Study design**

17  
18 The trial is designed as a randomized, controlled, participant, investigator and outcomes  
19 assessor blinded, experimental study, aimed at comparing three different physiotherapy  
20 protocols applied in three intervention groups of PT patients. Randomization will be  
21 performed as block randomization with a 1:1:1 allocation.  
22  
23  
24  
25  
26  
27  
28

29 This protocol follows the standards of the Helsinki Convention of good clinical practices.  
30 The Ethics Committee of Aragon (CEICA) has evaluated the project and has given its  
31 favorable opinion and support, N° PI15/0017 (Appendix 1).  
32  
33  
34  
35

36 The study has been carried out following the SPIRIT statement for clinical trial protocol  
37 and a SPIRIT Checklist has been included (Appendix 2).  
38  
39  
40  
41  
42

### 43 **Study setting**

44 After reviewing the literature and observing the high incidence of this pathology in  
45 amateur young adult athletes who perform sports and more specifically, jump sports,  
46 patient recruitment has been performed in basketball, football, volleyball, CrossFit, and  
47 handball sports clubs, together with running clubs and several gyms located in the city. A  
48 decision was made to conduct the study in X, where the university is located, as well as  
49 the laboratory to be used for assessments and treatments.  
50  
51  
52  
53  
54  
55  
56  
57  
58  
59  
60

1  
2  
3 The assessments will be conducted at the Motion Analysis laboratory of X, and the  
4  
5 treatment will be performed at two different sites depending on the availability of both  
6  
7 spaces and of schedules. Nonetheless, the same material will always be used.  
8  
9

## 10 11 12 **Participants**

### 13 14 *Inclusion criteria*

15  
16 Participants eligible for inclusion in this study must meet the following criteria: 1. History  
17  
18 of PT and anterior knee pain located on the inferior pole of the patella for over three  
19  
20 months; 2. Aged between 18 and 45 years; 3. Palpation tenderness of the superior  
21  
22 insertion of the patellar tendon; 4. A score below 80 on the VISA-p questionnaire.  
23  
24

### 25 26 *Exclusion criteria*

27  
28 Exclusion criteria for the study are: 1. Knee surgery within the previous six months; 2.  
29  
30 Chronic joint diseases; 3. Corticosteroid injection in the patellar tendon within the  
31  
32 previous three months; 4. Contraindications for needling; 5. Use of drugs 48 hours  
33  
34 previously (e.g. NSAIDs); 6. Any other concomitant treatment for PT.  
35  
36  
37  
38  
39

## 40 41 **Methodology**

42  
43 In the first session, all participants will be instructed on how to perform a daily home  
44  
45 program of EE. This will consist of performing three sets of 15 single leg squat repetitions  
46  
47 on a decline board every day, according to Alfredson's protocol(20) increasing the speed  
48  
49 if participants do not have pain. Participants will be informed that exercise is allowed to  
50  
51 reach 5 in a numerical pain rating scale(21), and if it is higher then they will stop and  
52  
53 notify the researcher, attempting once again 24 h later following the same rules.  
54  
55

56  
57 For the interventions, the participants will be placed in a supine position with a pillow  
58  
59 under the knee (approximately 20° of knee flexion). The area will be cleansed with an  
60

1  
2  
3 antiseptic solution (70% Propan-2-ol, Skin-des). An ultrasound probe cover will be used  
4  
5 during the intervention for infectious control. To determine the relevant treatment area,  
6  
7 two factors will be considered: 1) Palpation of the areas exhibiting higher sensitivity and  
8  
9 that reproduce the patient's symptoms; 2) Tendon areas showing degenerative changes  
10  
11 assessed under ultrasound. Each group will receive a total of four sessions distributed  
12  
13 throughout eight weeks of treatment, once every two weeks.  
14  
15  
16  
17  
18

19 *DN intervention combined with EE (DN-G) and PNE intervention combined with EE*  
20  
21 *(PNE-G)*  
22

23 Specific DN needles will be used during needling treatments, (Agu-punt, Spain).  
24  
25 Considering the thickness of the tendon and the approach, we shall use needles measuring  
26  
27 0.25 x 25 mm. The procedure will be guided by US to ensure the specificity of application  
28  
29 on the injured area and to guarantee that the procedure is safe for the patient. The DN  
30  
31 needle will reach the relevant treatment area (areas with degenerative PT changes). Each  
32  
33 session will consist of three needle insertions lasting three seconds each. In PNE-G  
34  
35 applications, an intensity of 3 mA galvanic current will be used during the three seconds  
36  
37 that the procedure lasts(19). The dose of 3 mA has demonstrated to be as effective as 6  
38  
39 mA in the treatment of tendinopathy injuries in animal models(18,19). In humans, a study  
40  
41 conducted in 2016 showed that a dose of 3 mA in PT generated structural changes  
42  
43 compatible with tendon regeneration, together with improvement of functionality and  
44  
45 pain (22). In contrast, the same study found that lower doses were effective only for the  
46  
47 improvement of functionality and pain. As a result, a 3 mA dose was selected for this  
48  
49 study.  
50  
51  
52  
53  
54  
55  
56  
57

58 *Control group (CG)*  
59  
60

1  
2  
3 A sham needle will be placed upon the treatment zone, simulating the same procedure as  
4 the rest of participants enrolled in the other groups. The needle will be placed in a specific  
5 holder and will be manipulated during the intervention to simulate a real treatment. This  
6 holder will have a cover over the bottom part of the same in order to avoid the needle  
7 contacting the skin.  
8  
9  
10  
11  
12  
13  
14  
15  
16

## 17 **Outcomes**

### 18 *Baseline data*

19  
20  
21 Baseline data will include gender, age, height, weight, body-mass index, affected side,  
22 level, sports and frequency of physical activity, duration of symptoms, medication and  
23 previous rehabilitation treatments and infiltrations received. A blinded observer will  
24 assess all participants at baseline, 10 weeks and 22 weeks after baseline. Participants will  
25 be asked to inform the researchers if there were any changes in medication or if they are  
26 receiving any other treatment or infiltration during the study.  
27  
28  
29  
30  
31  
32  
33  
34

### 35 *Primary outcome measure*

36  
37 Participants will complete the VISA-p questionnaire at baseline. The VISA-p  
38 questionnaire is designed to measure the severity of PT(23). The VISA-p score is the  
39 primary outcome variable. This scale consists of eight questions, the first six questions of  
40 which employ an analogical visual scale in order to assign a score of 0 to 10, where 10  
41 represents the optimum state, for the purpose of quantifying pain and function in different  
42 activities, whereas the last two questions assess the level of functionality and ability to  
43 perform physical activity.  
44  
45  
46  
47  
48  
49  
50  
51  
52

### 53 *Secondary outcome measure*

54  
55 During the first evaluation, participants will complete the Visual Analog Scale (VAS),  
56 considering the level of pain they feel while practicing their sport's activity. Participants  
57  
58  
59  
60

1  
2  
3 will be explained that a score of 0 indicates the absence of pain whereas a score of 10  
4 represents the maximum tolerable pain. They will also complete a questionnaire to assess  
5 their quality of life (SF-36)(24).  
6  
7  
8

9  
10 In order to assess tendon structure, an US evaluation using ultrasound equipment (Logic  
11 S7 Expert, General Electric Healthcare) and a linear probe (MLG-15 5–10 MHz) will be  
12 used. The ultrasonographic assessment protocol will be carried out according to the  
13 Musculoskeletal Ultrasound Technical Guidelines: Knee, defined by the European  
14 Society of Musculoskeletal Radiology(25). The ultrasonographic assessment will consist  
15 of a longitudinal sequence from the tendon origin to the insertion and transverse sections  
16 on the pole of the patella, the tendon body and its insertion on the tibial tuberosity, with  
17 the subject in supine position, with 20° knee flexion, and a pillow under the knee. The  
18 presence of degenerative signs compatible with the medical diagnosis of PT (thickness of  
19 the tendon, hypoechoic areas, irregularities affecting the cortical bone, calcifications) that  
20 could be relevant for the selection of the target area will also be assessed. In addition,  
21 CD-US assessment will be carried out to detect the presence of hypervascularization, with  
22 the subject in supine position and with the knee relaxed in full extension, in order to obtain  
23 further information to specifically define the target area.  
24  
25  
26  
27  
28  
29  
30  
31  
32  
33  
34  
35  
36  
37  
38  
39  
40  
41

42 Upon completion of the evaluation, a jump test will be carried out, measured with a force  
43 platform (FP4060-10-2000, Bertec Corporation). In this evaluation, subjects will warm  
44 up during 5 minutes on a treadmill, subsequently, they will perform dynamic stretches for  
45 the leg muscles. The Jump test will be explained to participants and they will be asked to  
46 demonstrate how they will perform the assessment to ensure that they have understood it  
47 before going to the platform. Later, patients will go to the platform forces and will  
48 perform each jump 3 times (squat jump, Abalakov jump and countermovement jump test)  
49 with 60 seconds between jumps and 2 minutes between different jumps (Table 1)(26-28).  
50  
51  
52  
53  
54  
55  
56  
57  
58  
59  
60

1  
2  
3 The maximum height of the jump will be analyzed via the measurement of the flight time  
4 recorded on the force platforms, the eccentric power and the maximum concentric force  
5 performed. The Abalakov jump will be performed with the subject standing in an upright  
6 position with a full arm swing. A rapid downward movement will be immediately  
7 followed by a rapid upward vertical movement as high as possible, all in one sequence.  
8 The same procedure will be applied for the CMJ jump, however, this test will be  
9 performed with the hands on the hips to avoid arm swings. Finally, a Squat Jump will be  
10 performed with 90 degrees of flexion of the knee.  
11  
12  
13  
14  
15  
16  
17  
18  
19  
20  
21  
22  
23

### 24 **Participant timeline**

25  
26 The study design will be a double-blind randomized controlled trial. The flow chart of  
27 the trial is shown in Figure 1 and the check list SPIRIT schedule is shown in Figure 2.  
28  
29  
30  
31  
32

### 33 **'Patient and Public Involvement'**

34  
35 Patients with PT were not involved in setting the research question or the outcome  
36 measures, however the concept of patient involvement translated to the execution phases  
37 of the research. Patients and their families were central to the dissemination of the  
38 information, which helped to recruit study participants. We intend to disseminate the main  
39 results to trial participants and will seek patient and public involvement in the  
40 development of an appropriate method of dissemination.  
41  
42  
43  
44  
45  
46  
47  
48  
49  
50

### 51 **Sample size**

52  
53 Regarding the sample size, a calculation of statistical power was made prior to the study.  
54  
55 Accepting an alpha risk of 0.05 and a beta risk in a bilateral contrast, 19 subjects are  
56 needed in every treatment group to detect a difference equal or superior to 15 points on  
57  
58  
59  
60

1  
2  
3 the VISA-p scale and assuming a standard deviation of 15 points(29). The estimated rate  
4  
5 of loss to follow-up is 20%.

6  
7 Recruitment of subjects for the trial will take place between October 2018 and March  
8  
9 2020 and will be carried out by means of informative campaigns targeted at different  
10  
11 Sports Clubs and Federations by means of e-mail and advertisements in the different  
12  
13 University mass media.  
14

15  
16 The interested subjects will receive an e-mail explaining the inclusion and exclusion  
17  
18 criteria, as well as the purpose of the study. If they meet the defined criteria, they will be  
19  
20 invited to send us their medical diagnosis.  
21  
22

## 23 24 25 26 **Recruitment**

27  
28 Participants will be recruited from sports clubs by the physiotherapist or the coach.  
29  
30 Contact has been made with various orthopedists who will collaborate with recruitment,  
31  
32 so that when they establish a diagnosis of this pathology in their examination room they  
33  
34 can refer us to the patients for their recruitment to the study.  
35  
36

## 37 38 39 40 **Allocation**

41  
42 Participants will be randomly assigned to either CG or DN-G or PNE-G with a 1:1:1  
43  
44 allocation using an opaque envelope, with a block size of fifteen participants (5 for each  
45  
46 group).  
47

48  
49 Sealed opaque randomization envelopes with a study-specific participant number will be  
50  
51 supplied by an external statistician. A colleague not involved in the research study will  
52  
53 take the sealed opaque numbered envelopes in order, by number, and deliver the correct  
54  
55 envelope to the treating physical therapist. The envelope will contain a piece of paper,  
56  
57  
58  
59  
60

1  
2  
3 which will be labelled with the same participant specific number, plus the group  
4  
5 assignment (PNE-G, DN-G or CG).  
6

7  
8 Participants who fulfill the inclusion criteria will receive the standardized oral and written  
9  
10 information, and, once they grant their consent to take part in the trial, they will be  
11  
12 randomized into the three groups.  
13  
14  
15

### 16 17 **Blinding**

18  
19 Assessments regarding clinical recovery will be conducted by an assessor blinded to  
20  
21 treatment allocation. Due to the nature of the intervention, participants can be blinded to  
22  
23 allocation. Patients will be explained that they are going to receive a needling treatment,  
24  
25 that it may be slightly painful, and that if at any time they are unable to tolerate the pain  
26  
27 they must inform the researcher to stop the intervention. In order to blind patients, all the  
28  
29 interventions were made with the ultrasound and the PNE device connected to simulate  
30  
31 the same intervention in all groups. In contrast, the physiotherapist performing the  
32  
33 intervention cannot be blinded, however he/she will be instructed not to disclose the  
34  
35 allocation status of the participant at any time or during the follow up assessments. An  
36  
37 employee outside the research team will feed data into the computer in separate datasheets  
38  
39 so that the researchers can analyze data without having access to information about the  
40  
41 allocation.  
42  
43  
44  
45

46  
47 With the intention of evaluating patient blinding, an online questionnaire will be sent to  
48  
49 participants upon completion of the study, asking them about the treatment they received.  
50  
51

### 52 53 **Data collection methods**

54  
55 For the data collection, an oral questionnaire will be used containing questions targeted  
56  
57 at collecting baseline data and information concerning the pathology.  
58  
59  
60



1  
2  
3 Different questionnaires and assessment scales (VISA-p, VAS, SF-36) in Spanish will  
4  
5 be given to each participant in paper when they attend the assessment, and they will be  
6  
7 granted sufficient time to complete the same.  
8  
9

### 12 **Data management and statistical analysis**

14 In this study, all data will be entered electronically in the assessment room.

16 Original scales and questionnaires will be entered and kept on a locked file at the  
17  
18 participating site.  
19

21 Participant files are to be stored in numerical order and stored in a secure and accessible  
22  
23 place and manner. Participant files will be maintained in storage for a period of 2 years  
24  
25 after completion of the study.  
26

28 The statistical analysis will be carried out by an intention-to-treat analysis. Variables will  
29  
30 be described in number (percentage) and average (standard deviation) or median  
31  
32 (interquartile range) attending to their distribution. Quantitative variables will be  
33  
34 analyzed with the Shapiro Wilk test in order to confirm their distribution and to determine  
35  
36 correct statistical tests according to these results.  
37  
38

39 Outcomes will be analyzed using mixed linear and logistic regression models considering  
40  
41 participants as a random effect and group of treatment as fixed factors. Baseline  
42  
43 characteristics will be introduced in the model as covariance. Numbers needed to treat  
44  
45 index will also be calculated. The primary aim of the analysis will be to calculate the  
46  
47 difference obtained in the VISA-p score after the intervention (final measurement - initial  
48  
49 measurement). Finally, the magnitude of the effect of the result will be calculated and  
50  
51 therefore its clinical importance, by means of the following formula:  
52  
53

$$54 \quad I^* = \sqrt{\frac{F(1,dfR)}{F(1,dfR) + dfR}}$$

56 The significance level set for all the analysis will be  $p \leq 0.05$ .  
57  
58  
59  
60

## ETHICS AND DISEMINATION

The study design, procedures and informed consent procedure were approved and consequently the study will be carried out in compliance with the Helsinki Declaration of Human Rights. All participants will have to provide written Spanish informed consent.

Appendix 1.

The results for this trial will be published in peer-reviewed international journals or otherwise made publicly available and will be presented at national and international conferences and symposiums irrespective of the outcomes.

Any modifications to the protocol, which may impact the study procedures, potential patient benefits or may affect patient safety, including changes of study objectives, study design, patient population, sample sizes, study procedures, or significant administrative aspects will require a formal amendment to the protocol. Such amendments will be approved by the Ethics Committee prior to implementation and notified to the health authorities in accordance with local regulations.

All study-related information will be stored securely at the study site. All participant information will be stored in locked file cabinets in areas with limited access. All records that contain names or other personal identifiers, such as locator forms and informed consent forms, will be stored identified by code number. All local databases will be secured with password-protected access systems.

**Availability of data and material:** The datasets used and/or analyzed during the current study are available from the corresponding author on reasonable request.

## DISCUSSION

1  
2  
3 This study seeks to investigate the effects of physiotherapy needling techniques on pain,  
4  
5 functionality and quality of life in PT.  
6

7  
8 PT is a common cause of knee pain in cases of degeneration of the patellar tendon. Among  
9  
10 the causes of PT, extrinsic factors (e.g., patellar tendon loading with exercise) and  
11  
12 intrinsic factors (e.g., malalignment, high patella, imbalances) have been proposed(30).  
13  
14 Traditionally, the focus has been on quadriceps strengthening exercises and many reviews  
15  
16 have shown that the effect of the treatment could be estimated to give the patients a 50-  
17  
18 70% change of improvement on pain and functionality(6, 32, 33).  
19

20  
21 Regarding needling treatment, previous studies have shown a great improvement in PT  
22  
23 using PNE in combination with EE, with all patients reporting an improvement at least  
24  
25 one month after treatment(12-14, 18). This is an improvement compared to the minimum  
26  
27 three months needed to improve symptoms by applying other conventional techniques  
28  
29 (pharmacological and biological treatments, cold/heat techniques, shock waves, etc.)  
30  
31 Additionally, in a long-term study conducted in 2013, this technique was shown to  
32  
33 improve symptoms quickly and steadily for at least 10 years(33). These findings  
34  
35 demonstrate that this technique ensures that patients remain pain-free for a long period.  
36  
37 Furthermore, we were only able to find four articles(12-14, 18) addressing the application  
38  
39 of PNE for the recovery of PT, however, none of the articles studied were RCTs, which  
40  
41 entail limited evidence of the effectiveness of this technique.  
42  
43  
44  
45

46  
47 In addition, there are no standardized protocols for the application of PNE, which explains  
48  
49 the great variability in the number of sessions and application time based on the literature.  
50  
51 Therefore, this study aims to facilitate clinical practice and combine the available  
52  
53 methodology criteria in the application of this promising technique.  
54

55  
56 Regarding DN, the literature shows many similarities with PNE, since there is only one  
57  
58 RCT that compares functionality improvements among patients who have received PRP.  
59  
60

1  
2  
3 This study reflected that in the short term PRP had better results for pain and functionality,  
4  
5 however, DN was more effective than PRP after six months(34).  
6

7  
8 For the application of both needling techniques, US-guidance is normally used to be able  
9  
10 to observe firstly the presentation of the tendon, and later to observe the needle and enable  
11  
12 a much more specific treatment approach. However, US has disadvantages including its  
13  
14 operator dependence and the limited ability to rule out intra-articular disease. The  
15  
16 sensitivity and specificity of ultrasonography for patellar tendinopathy is between 58%  
17  
18 and 94%, respectively(35).  
19

20  
21 Moreover, functionality of the tendon is usually measured with the VISA-p(36,37),  
22  
23 whereas jump tests (representing a similar action to that performed in subject's daily  
24  
25 sports) are only evaluated in a few papers(27,38). Countermovement jumps and squat  
26  
27 jumps are the most reliable and valid field tests for the estimation of the explosive power  
28  
29 of the lower limbs in physically active men(39). Thus, we will combine both, in order to  
30  
31 be more accurate in the assessment of the tendon's functionality, and be able to assess  
32  
33 changes that may affect their sport performance.  
34  
35

36  
37 This study has several strengths. First, we will evaluate two techniques that currently lack  
38  
39 strong evidence. However, in doing so, we are contributing to new knowledge in the field  
40  
41 of the recovery of musculoskeletal injuries. Second, the role of invasive techniques will  
42  
43 be determined by comparing the effects between these techniques and a control group.  
44  
45 The reliability of data is ensured, as both patients and the assessor will be blinded. Third,  
46  
47 a sub-analysis with US will be performed to investigate changes in the presence of  
48  
49 calcifications, cortical irregularities, neovascularization, thickness, eco-intensity, eco-  
50  
51 variation and eco-texture of the patellar tendon.  
52  
53  
54  
55  
56  
57  
58  
59  
60

1  
2  
3 However, there are some limitations to this study. Blinding of the physiotherapist  
4 performing the intervention is not possible. Furthermore, follow-up is limited to 22 weeks  
5 after baseline.  
6  
7

8  
9  
10 The findings obtained may help advance the treatment of this injury by identifying the  
11 most effective treatment protocol and to avoid the associated consequences, such as the  
12 prevention of relapses and reducing the potential impact on the musculoskeletal system.  
13  
14  
15

## 16 17 18 19 REFERENCES

- 20  
21  
22 1. Knobloch K. The role of tendon microcirculation in Achilles and patellar  
23 tendinopathy. *Journal of orthopaedic surgery and research.* 2008;3:18.
- 24  
25 2. Zwerver J, Bredeweg SW, van den Akker-Scheek I. Prevalence of Jumper's Knee  
26 Among Nonelite Athletes From Different Sports A Cross-Sectional Survey. *American*  
27 *Journal of Sports Medicine.* 2011;39(9):1984-8.
- 28  
29 3. Stenroth L, Sefa S, Arokoski J, Toyras J. Does Magnetic Resonance Imaging  
30 Provide Superior Reliability for Achilles and Patellar Tendon Cross-Sectional Area  
31 Measurements Compared with Ultrasound Imaging? *Ultrasound Med Biol.*  
32 2019;45(12):3186-98.
- 33  
34 4. Taylor DW, Petrera M, Hendry M, Theodoropoulos JS. A Systematic Review of  
35 the Use of Platelet-Rich Plasma in Sports Medicine as a New Treatment for Tendon and  
36 Ligament Injuries. *Clinical Journal of Sport Medicine.* 2011;21(4):344-52.
- 37  
38 5. Andres BM, Murrell GAC. Treatment of tendinopathy: What works, what does  
39 not, and what is on the horizon. *Clinical Orthopaedics and Related Research.*  
40 2008;466(7):1539-54.
- 41  
42 6. Larsson MEH, Kall I, Nilsson-Helander K. Treatment of patellar tendinopathy-a  
43 systematic review of randomized controlled trials. *Knee Surgery Sports Traumatology*  
44 *Arthroscopy.* 2012;20(8):1632-46.
- 45  
46 7. Kongsgaard M, Kovanen V, Aagaard P, Doessing S, Hansen P, Laursen AH, et  
47 al. Corticosteroid injections, eccentric decline squat training and heavy slow resistance  
48 training in patellar tendinopathy. *Scandinavian Journal of Medicine & Science in Sports.*  
49 2009;19(6):790-802.  
50  
51  
52  
53  
54  
55  
56  
57  
58  
59  
60

- 1  
2  
3 8. Murtaugh B, Ihm JM. Eccentric Training for the Treatment of Tendinopathies.  
4 Current Sports Medicine Reports. 2013;12(3):175-82.  
5
- 6 9. Young MA, Cook JL, Purdam CR, Kiss ZS, Alfredson H. Eccentric decline squat  
7 protocol offers superior results at 12 months compared with traditional eccentric protocol  
8 for patellar tendinopathy in volleyball players. British Journal of Sports Medicine.  
9 2005;39(2):102-5.  
10
- 11 10. Ortega-Castillo M, Medina-Porqueres I. Effectiveness of the eccentric exercise  
12 therapy in physically active adults with symptomatic shoulder impingement or lateral  
13 epicondylar tendinopathy: A systematic review. J Sci Med Sport. 2016;19(6):438-53.  
14
- 15 11. James SLJ, Ali K, Pocock C, Robertson C, Walter J, Bell J, et al. Ultrasound  
16 guided dry needling and autologous blood injection for patellar tendinosis. British Journal  
17 of Sports Medicine. 2007;41(8):518-21.  
18
- 19 12. Abat F DW, Gelber PE, Polidori F, Monllau JC, Sanchez-Ibañez JM.  
20 Effectiveness of the Intratissue Percutaneous Electrolysis (EPI®) technique and  
21 isoinertial eccentric exercise in the treatment of patellar tendinopathy at two years follow-  
22 up. Muscles Ligaments Tendons J. 2014;14(4):188-93.  
23
- 24 13. Valera Garrido F, Minaya Muñoz F, JM SI. Effectiveness of electrolysis  
25 percutaneous intratissular (EPI®) in chronic insertional patellar tendinopathy. Trauma  
26 Fund MAPFRE. 2010;21(4):227-36.  
27
- 28 14. Sánchez-Ibañez J, Alves R, Polidori F, Valera F, Minaya F, Valles-Martí S, et al.  
29 Effectiveness of ultrasound-guided percutaneous electrolysis intratendon (EPI) in the  
30 treatment of insertional patellar tendinopathy in soccer players. Br J Sports Med.  
31 2013;47(e2).  
32
- 33 15. Zwerver J, Verhagen E, Hartgens F, van den Akker-Scheek I, Diercks RL. The  
34 TOPGAME-study: effectiveness of extracorporeal shockwave therapy in jumping  
35 athletes with patellar tendinopathy. Design of a randomised controlled trial. BMC  
36 Musculoskeletal Disorders. 2010;11:6.  
37
- 38 16. Riggins CN, Chen M, Gordon JA, Schultz SM, Soslowky LJ, Khoury V.  
39 Ultrasound-Guided Dry Needling of the Healthy Rat Supraspinatus Tendon Elicits Early  
40 Healing Without Causing Permanent Damage. J Orthop Res. 2019;37(9):2035-42.  
41
- 42 17. Krey D, Borchers J, McCamey K. Tendon needling for treatment of tendinopathy:  
43 A systematic review. Physician and Sportsmedicine. 2015;43(1):80-6.  
44  
45  
46  
47  
48  
49  
50  
51  
52  
53  
54  
55  
56  
57  
58  
59  
60

18. Abat F, Valles S-L, Gelber P-E, Polidori F, Jorda A, Garcia-Herreros S, et al. An experimental study of muscular injury repair in a mouse model of notexin-induced lesion with EPI technique. *BMC sports science, medicine and rehabilitation*. 2015;7:7-.
19. Valera-Garrido, F, Minaya-Muñoz, F, Sánchez-Ibáñez, JM. Comparison of the acute inflammatory response and proliferation of dry needling and electrolysis percutaneous intratissue (epi) in healthy rat Achilles tendons. *Br J Sports Med*. 2013;47(9):e2-e2.
20. Alfredson H, Pietila T, Jonsson P, Lorentzon P. Heavy-load eccentric calf muscle training for the treatment of chronic Achilles tendinosis. *American Journal of Sports Medicine*. 1998;26(3):360-6.
21. Silbernagel KG, Crossley KM. A Proposed Return-to-Sport Program for Patients With Midportion Achilles Tendinopathy: Rationale and Implementation. *J Orthop Sports Phys Ther*. 2015;45(11):876-86.
22. Padrón-Benítez, A, Rojas-Mederos, S. A comparative study between low and high intensity percutaneous needle electrolysis in patients with patellar tendinopathy: a structural and functional analysis. *J Invasive Tech Phys Ther*. 2016;1(1):10-17.
23. Hernandez-Sanchez S, Hidalgo MD, Gomez A. Cross-cultural Adaptation of VISA-P Score for Patellar Tendinopathy in Spanish Population. *Journal of Orthopaedic & Sports Physical Therapy*. 2011;41(8):581-91.
24. Alonso J, Prieto L, Anto JM. The spanish version of the SF-36 health survey- A measure of clinical outcomes. *Medicina Clinica*. 1995;104(20):771-6.
25. Martinoli C. Musculoskeletal ultrasound: technical guidelines. *Insights into imaging*. 2010;1(3):99-141.
26. Rodriguez-Rosell D, Mora-Custodio R, Franco-Marquez F, Yanez-Garcia JM, Gonzalez-Badillo JJ. Traditional vs. Sport-Specific Vertical Jump Tests: Reliability, Validity, and Relationship With the Legs Strength and Sprint Performance in Adult and Teen Soccer and Basketball Players. *J Strength Cond Res*. 2017;31(1):196-206.
27. Helland C, Bojsen-Moller J, Raastad T, Seynnes OR, Moltubakk MM, Jakobsen V, et al. Mechanical properties of the patellar tendon in elite volleyball players with and without patellar tendinopathy. *Br J Sports Med*. 2013;47(13):862-8.
28. Gual G, Fort-Vanmeerhaeghe A, Romero-Rodriguez D, Tesch PA. Effects of In-Season Inertial Resistance Training With Eccentric Overload in a Sports Population at Risk for Patellar Tendinopathy. *J Strength Cond Res*. 2016;30(7):1834-42.

- 1  
2  
3 29. Scott A, LaPrade RF, Harmon KG, Filardo G, Kon E, Della Villa S, et al. Platelet-  
4 Rich Plasma for Patellar Tendinopathy: A Randomized Controlled Trial of Leukocyte-  
5 Rich PRP or Leukocyte-Poor PRP Versus Saline. *Am J Sports Med.*  
6 2019;363546519837954.  
7  
8  
9  
10 30. Figueroa D, Figueroa F, Calvo R. Patellar Tendinopathy: Diagnosis and  
11 Treatment. *J Am Acad Orthop Surg.* 2016;24(12):e184-e92.  
12  
13 31. Lian OB, Engebretsen L, Bahr R. Prevalence of jumper's knee among elite athletes  
14 from different sports - A cross-sectional study. *American Journal of Sports Medicine.*  
15 2005;33(4):561-7.  
16  
17 32. Visnes H, Bahr R. The evolution of eccentric training as treatment for patellar  
18 tendinopathy (jumper's knee): a critical review of exercise programmes. *British Journal*  
19 *of Sports Medicine.* 2007;41(4):217-23.  
20  
21 33. Abat F, Gelber PE, Polidori F, Monllau JC, Sanchez-Ibanez JM. Clinical results  
22 after ultrasound-guided intratissue percutaneous electrolysis (EPIA (R)) and eccentric  
23 exercise in the treatment of patellar tendinopathy. *Knee Surgery Sports Traumatology*  
24 *Arthroscopy.* 2015;23(4):1046-52.  
25  
26 34. Drago JL, Wasterlain AS, Braun HJ, Nead KT. Platelet-Rich Plasma as a  
27 Treatment for Patellar Tendinopathy A Double-Blind, Randomized Controlled Trial.  
28 *American Journal of Sports Medicine.* 2014;42(3):610-8.  
29  
30 35. Warden SJ, Kiss ZS, Malara FA, Ooi ABT, Cook JL, Crossley KM. Comparative  
31 accuracy of magnetic resonance imaging and ultrasonography in confirming clinically  
32 diagnosed patellar tendinopathy. *American Journal of Sports Medicine.* 2007;35(3):427-  
33 36.  
34  
35 36. Hernandez-Sanchez S, Hidalgo MD, Gomez A. Cross-cultural adaptation of  
36 VISA-P score for patellar tendinopathy in Spanish population. *J Orthop Sports Phys Ther.*  
37 2011;41(8):581-91.  
38  
39 37. Andriolo L, Altamura SA, Reale D, Candrian C, Zaffagnini S, Filardo G.  
40 Nonsurgical Treatments of Patellar Tendinopathy: Multiple Injections of Platelet-Rich  
41 Plasma Are a Suitable Option: A Systematic Review and Meta-analysis. *Am J Sports*  
42 *Med.* 2019;47(4):1001-18.  
43  
44 38. de Vries A, Zwerver J, Diercks R, Tak I, van Berkel S, van Cingel R, et al. Effect  
45 of patellar strap and sports tape on pain in patellar tendinopathy: A randomized controlled  
46 trial. *Scand J Med Sci Sports.* 2016;26(10):1217-24.  
47  
48  
49  
50  
51  
52  
53  
54  
55  
56  
57  
58  
59  
60



1  
2  
3 39. Markovic G, Dizdar D, Jukic I, Cardinale M. Reliability and factorial validity of  
4 squat and countermovement jump tests. J Strength Cond Res. 2004;18(3):551-5.  
5  
6  
7  
8

9  
10 **AUTHOR'S CONTRIBUTIONS**

11 MPL, EMG and PH conceived of the idea, and developed the intervention. MPL and PH  
12 wrote the article. MPL, MO, RMG, AVB, ZA, YH and PH developed the design of the  
13 trial. MO were involved in development of the statistical analysis of the trial and  
14 contributed to the content of the article. AVB contributed to the design and writing of the  
15 jump test protocol. All authors have read and approved the final manuscript.  
16  
17  
18  
19  
20  
21  
22  
23  
24  
25  
26

27 **FUNDING STATEMENT**

28 This research received no specific grant from any funding agency in the public,  
29 commercial or not-for-profit sectors.  
30  
31  
32  
33  
34  
35

36 **COMPETING INTEREST STATEMENT**

37 The authors declare that they have no competing interests.  
38  
39  
40  
41  
42  
43  
44  
45  
46  
47  
48  
49  
50  
51  
52  
53  
54  
55  
56  
57  
58  
59  
60

1  
2  
3 **TABLES**  
4

5 Table 1. Jump test's protocol.  
6  
7

8  
9

| <b>JUMP TEST PROTOCOL</b>                                                                                                                                                                                                                                    |                                                                              |
|--------------------------------------------------------------------------------------------------------------------------------------------------------------------------------------------------------------------------------------------------------------|------------------------------------------------------------------------------|
| 5-minute warm-up consisting of steady jogging on a treadmill                                                                                                                                                                                                 |                                                                              |
| Dynamic Stretches lasting 5 minutes, as instructed by the physical therapist                                                                                                                                                                                 | Psoas<br>Quadriceps<br>Gluteus maximus<br>Gastrocnemius<br>Hamstring muscles |
| Three jump tests are performed<br>- 3 jumps off the ground for 3 times for the patient to become familiar with the tests<br>- The subject is placed on the platform and asked to perform each test 3 times, with 60 seconds rest between the different tests | Abalakov test<br>Countermovement jump test<br>Squat jump                     |
| The highest jump is selected for the study                                                                                                                                                                                                                   |                                                                              |

10  
11  
12  
13  
14  
15  
16  
17  
18  
19  
20  
21  
22  
23  
24  
25  
26  
27  
28  
29  
30  
31  
32  
33  
34  
35  
36  
37  
38  
39  
40

41 **FIGURES**  
42

43 Figure 1. Flow diagram. Randomized controlled trial design.  
44

45 G-PNE: Percutaneous Needle Electrolysis Group. G-DN: Dry Needle Group.  
46  
47

48  
49 Figure 2. Schedule for the enrolment and intervention.  
50

51 Schedule for enrolment and intervention per cluster. -t1: baseline; t1-t2: intervention period; t2: 8 weeks  
52 after baseline; t3: 10 weeks after baseline; t4: 3 months after baseline. G-PNE: Percutaneous Needle  
53 Electrolysis Group; G-DN: Dry Needle Group; US: ultrasound.  
54  
55  
56  
57  
58  
59  
60

1  
2  
3  
4  
5  
6  
7  
8  
9  
10  
11  
12  
13  
14  
15  
16  
17  
18  
19  
20  
21  
22  
23  
24  
25  
26  
27  
28  
29  
30  
31  
32  
33  
34  
35  
36  
37  
38  
39  
40  
41  
42  
43  
44  
45  
46  
47  
48  
49  
50  
51  
52  
53  
54  
55  
56  
57  
58  
59  
60

Figure 1. Flow diagram. Randomized controlled trial design.



210x297mm (300 x 300 DPI)

Figure 2. Schedule for enrolment and intervention.

|                                         | Enrolment       | Allocation | Close-out      |                |                |                |
|-----------------------------------------|-----------------|------------|----------------|----------------|----------------|----------------|
| TIMEPOINT**                             | -t <sub>1</sub> | 0          | t <sub>1</sub> | t <sub>2</sub> | t <sub>3</sub> | t <sub>4</sub> |
| <b>ENROLMENT:</b>                       |                 |            |                |                |                |                |
| Eligibility screen                      | X               |            |                |                |                |                |
| Informed consent                        | X               |            |                |                |                |                |
| Allocation                              |                 | X          |                |                |                |                |
| <b>INTERVENTIONS:</b>                   |                 |            |                |                |                |                |
| <i>Control group</i>                    |                 |            | ↔              |                |                |                |
| <i>G-PNE</i>                            |                 |            | ↔              |                |                |                |
| <i>G-DN</i>                             |                 |            | ↔              |                |                |                |
| <b>ASSESSMENTS:</b>                     |                 |            |                |                |                |                |
| <i>Baseline demographic information</i> | X               |            |                |                |                |                |
| <i>VISA-P</i>                           | X               |            | X              |                | X              | X              |
| <i>VAS</i>                              |                 |            | X              |                | X              | X              |
| <i>SF-36</i>                            |                 |            | X              |                | X              | X              |
| <i>Tendon structure US</i>              |                 |            | X              |                | X              | X              |
| <i>Jump test</i>                        |                 |            | X              |                | X              | X              |

215x279mm (300 x 300 DPI)

## DOCUMENTO DE INFORMACIÓN AL PACIENTE

### Fecha:

**Título del proyecto:** “ESTUDIO COMPARATIVO ENTRE 3 TÉCNICAS DE PUNCIÓN PARA EL TRATAMIENTO DE LA TENDINOPATÍA CRÓNICA DEL TENDÓN ROTULIANO”

### Investigador principal:

Doña: M<sup>a</sup> Pilar López Royo

Este estudio se basa en el estudio comparativo de tres tratamientos que utilizan distintas técnicas de fisioterapia invasiva junto con un programa de ejercicio excéntrico para el tratamiento de la tendinopatía rotuliana. Por medio del tratamiento se produce una disminución del dolor asociado a esta patología y un aumento de la fuerza de la pierna, lo que a su vez hace que mejore la funcionalidad en las actividades de la vida diaria y mejore la calidad de vida.

### PROCESO DE SELECCIÓN DE PACIENTES

#### Criterios de inclusión:

- Edad comprendida entre 18 y 40 años.
- Practicar cualquier deporte de forma habitual.
- Pacientes con diagnóstico médico de tendinopatía rotuliana crónica con un mínimo de 3 meses de evolución y con sintomatología.
- Dolor a la palpación del tendón en el polo inferior de la rótula y durante el entrenamiento o competición.
- Puntuación del cuestionario VISA-P menor de 80 (el resultado obtenido de rellenar el cuestionario tiene que ser menor de 80 puntos de los 100 posibles para poder participar en el estudio).

#### Criterios de exclusión:

- Paciente operado de la rodilla afectada en los últimos 6 meses.
- Infiltraciones en la rodilla afectada en los últimos 3 meses.
- Paciente que ha recibido tratamiento farmacológico o fisioterápico en las últimas 48 horas o durante el estudio.
- Patología con menos de 3 meses de evolución.
- Presentar tendinopatía rotuliana bilateral.
- Puntuación del cuestionario VISA-p mayor o igual de 80 (el resultado obtenido de rellenar el cuestionario no puede ser igual o superar los 80 puntos de los 100 posibles, sino no podrá participar en el estudio).
- Imposibilidad para aplicar alguna de las técnicas de tratamiento o valoración por

1  
2            contraindicación absoluta o relativa.  
3  
4  
5  
6

## 7    **PROCEDIMIENTO**

8    El tratamiento consiste en realizar un protocolo de ejercicios excéntricos de cuádriceps que  
9    realizará en casa de forma diaria, y que serán revisados con el fisioterapeuta para valorar su  
10   correcta realización. Se complementará el tratamiento con la aplicación de una técnica de punción  
11   correcta realización. Se complementará el tratamiento con la aplicación de una técnica de punción  
12   según el protocolo de tratamiento propuesto de forma totalmente **aleatorizada** y según los  
13   criterios diagnósticos específicos de la misma, siguiendo las indicaciones, criterios de aplicación y  
14   criterios diagnósticos.  
15   criterios diagnósticos.

16   Son técnicas de punción cuyo objetivo es producir una respuesta inflamatoria aguda que active los  
17   mecanismos fisiológicos de regeneración del tejido y mejorar el dolor y la funcionalidad en la  
18   articulación de la rodilla, se realiza con agujas de punción seca, similares a las agujas de  
19   acupuntura y sin infiltrar ningún tipo de sustancia dentro del organismo.  
20   acupuntura y sin infiltrar ningún tipo de sustancia dentro del organismo.  
21  
22  
23  
24  
25

26   Los registros serán realizados en el Espacio de Valoración Funcional de la Universidad San Jorge,  
27   en la Facultad de Ciencias de la Salud, Edificio III. Se pondrá a su disposición la posibilidad de  
28   utilizar el autobús que utiliza el personal y alumnado de la universidad (en el horario que éste esté  
29   disponible). Las fechas y horarios serán convenidas con cada participante en función de su  
30   disponibilidad y la de los investigadores, buscando la conformidad de todos. La duración  
31   aproximada del estudio para cada paciente será de 30 minutos, aunque este horario podrá variar  
32   en función de los acontecimientos.  
33   en función de los acontecimientos.  
34  
35  
36  
37  
38

39   Será recibido por los miembros del equipo de investigación y una vez allí, se le realizará un primer  
40   análisis fisioterápico, rellenará una encuesta, una escala analógica visual (EVA) del dolor y el  
41   cuestionario Visa-p en el que se valorará la funcionalidad de la rodilla.  
42   cuestionario Visa-p en el que se valorará la funcionalidad de la rodilla.

43   Tras éste primer registro se le colocará un marcador pasivo en el pantalón. Se le pedirá que  
44   realice el siguiente protocolo:  
45   realice el siguiente protocolo:

- 46   - Calentamiento de 5 minutos en cinta a ritmo constante.
- 47   - Estiramientos dinámicos de psoas, cuádriceps, glúteo, gastrocnemios, isquiotibiales durante 5
- 48   minutos instruidos por el fisioterapeuta.
- 49   - Realización de los 3 saltos fuera de la plataforma durante 3 veces para que se familiarice con los
- 50   tests.
- 51   - En la plataforma de fuerzas realizará 3 test de salto: el test de Abalakov (ABK), el test de salto
- 52   con contramovimiento (CMJ) y el squatjump (SJ).
- 53   - En la plataforma de fuerzas realizará 3 test de salto: el test de Abalakov (ABK), el test de salto
- 54   con contramovimiento (CMJ) y el squatjump (SJ).
- 55   con contramovimiento (CMJ) y el squatjump (SJ).
- 56   con contramovimiento (CMJ) y el squatjump (SJ).
- 57   con contramovimiento (CMJ) y el squatjump (SJ).
- 58   con contramovimiento (CMJ) y el squatjump (SJ).
- 59   con contramovimiento (CMJ) y el squatjump (SJ).
- 60   con contramovimiento (CMJ) y el squatjump (SJ).

60   Se colocará en la plataforma y realizará 3 saltos de cada uno de los test con una separación entre  
ellos de 60 segundos.

Se valora el tendón por ecografía, y se recogen datos por medio de personal adiestrado y se envía

1 a personal especialista en radiodiagnóstico.

2  
3 Tras los registros de los saltos se dará por finalizada la valoración.

4  
5  
6 Tras la 1ª valoración, se realizará una división en tres grupos de los pacientes de forma  
7 aleatorizada.

8  
9 Se le realizará el protocolo de tratamiento de fisioterapia invasiva que le haya correspondido.  
10 Realizará una sesión del tratamiento cada 14 días, y se realizará la 2ª valoración 1 semana más  
11 tarde de la 4ª sesión de punción para valorar los cambios que se hayan producido tras el  
12 tratamiento, repitiéndose de nuevo el proceso de recogida de datos realizado al inicio del estudio.  
13 Se realizará un seguimiento a los tres meses de la valoración post-tratamiento para valorar la  
14 eficacia de la técnica a largo plazo del tratamiento.

15  
16 El procedimiento se realizará guiado ecográficamente para asegurar la especificidad de aplicación  
17 sobre la zona relevante de tratamiento y garantizar la seguridad de la técnica. Se hace posterior a  
18 esta intervención una serie de ejercicios excéntricos de cuádriceps. El tratamiento se realizará  
19 durante 4 sesiones (a razón de una sesión cada 14 días).

## 20 21 22 **RIESGOS**

23 La aplicación de las técnicas de punción utilizadas no han demostrado tener ningún efecto  
24 secundario hasta la fecha, aunque el paciente puede experimentar dolor durante y tras la punción,  
25 generalmente de uno o dos días de duración.

## 26 27 28 **RESPONSABILIDADES DEL PARTICIPANTE**

29 La información que usted posea sobre su estado de salud o sobre sensaciones previas  
30 anormales al realizarle una punción, puede afectar la seguridad o el valor de estas pruebas. La  
31 rápida comunicación por su parte de las sensaciones que experimenta al realizar esta prueba es  
32 también de gran importancia. Usted es responsable de revelar esa información al personal de la  
33 prueba cuando se le pregunte.

## 34 35 36 **PREGUNTAS**

37 Le animamos a que haga cualquier pregunta sobre los procedimientos seguidos o sus resultados  
38 en la prueba. Si tiene alguna preocupación o pregunta, por favor pídanos más información, para  
39 ello le dejamos un correo electrónico [mapilr86@hotmail.com](mailto:mapilr86@hotmail.com) y un número de teléfono móvil:  
40 616102365.

## 41 42 43 44 45 **LIBERTAD PARA DAR EL CONSENTIMIENTO**

46 Usted participa en el estudio de manera voluntaria, pudiendo abandonarlo en el momento  
47 que considere oportuno, sin que esto conlleve ninguna repercusión negativa para usted.

48 Los datos obtenidos en el estudio serán confidenciales y únicamente se hará uso de ellos

1  
2 para el cumplimiento de los objetivos planteados en la investigación. No se cederán estos datos a  
3 terceros sin el consentimiento expreso de los sujetos participantes a quienes pertenezcan los  
4 datos.  
5

6 En esta investigación se garantizará el anonimato de los sujetos que aportan los datos,  
7 estableciendo un código disociado para identificarlos que sólo será conocido por los responsables  
8 de la realización del trabajo de campo.  
9  
10  
11  
12  
13  
14  
15  
16

17 Fdo: M<sup>a</sup> Pilar López Royo  
18  
19  
20  
21  
22  
23  
24  
25  
26  
27  
28  
29  
30  
31  
32  
33  
34  
35  
36  
37  
38  
39  
40  
41  
42  
43  
44  
45  
46  
47  
48  
49  
50  
51  
52  
53  
54  
55  
56  
57  
58  
59  
60



## MODELO DE CONSENTIMIENTO INFORMADO

Título del PROYECTO: “ESTUDIO COMPARATIVO ENTRE 3 TÉCNICAS DE PUNCIÓN PARA EL TRATAMIENTO DE LA TENDINOPATÍA CRÓNICA DEL TENDÓN ROTULIANO”

Doña: M<sup>a</sup> Pilar López Royo ([mapilr86@hotmail.com](mailto:mapilr86@hotmail.com))  
Departamento de Fisiatría y Enfermería  
UNIVERSIDAD DE ZARAGOZA

Yo, ..... (nombre y apellidos del participante)

He recibido suficiente información en relación con el proyecto, he leído la hoja de información que se me ha entregado y he podido hacer preguntas sobre el proyecto, recibiendo respuestas satisfactorias.

Entiendo que la participación es voluntaria y que puedo abandonar el proyecto:

- . Cuando lo desee
- . Sin tener que dar explicaciones
- . Sin que esto repercuta en mis cuidados médicos

He sido claramente informado de forma clara y precisa del tratado que recibirán mis datos personales que se contienen en este proyecto, sabiendo que los datos serán tratados y custodiados bajo mi intimidad y a la vigente normativa de la protección de datos, y que sobre estos datos me asisten los derechos de rectificación, acceso y oposición comunicándolo al investigador principal que figura en este consentimiento.

Declaro que presto libremente mi conformidad para participar en el estudio.

Deseo ser informado sobre los resultados del estudio:      sí      no      (marque lo que proceda)

Así pues, acepto que las muestras derivadas de este proyecto puedan ser utilizadas en futuras investigaciones siempre y cuando están relacionadas con ésta.

Por lo tanto, doy mi conformidad para que mis datos clínicos sean revisados por personal ajeno al centro, para los fines del estudio, y soy consciente de que este consentimiento es

1  
2 revocable.  
3  
4  
5  
6

7 Firma del participante:

8 \_\_\_\_\_  
9

10 Fecha:

11 \_\_\_\_\_  
12  
13  
14  
15  
16

17 He explicado la naturaleza y el propósito del proyecto al paciente mencionado  
18  
19

20  
21 Firma del Investigador:

22 \_\_\_\_\_  
23

24 Fecha:

25 \_\_\_\_\_  
26  
27  
28  
29

30  
31 Consentimiento informado estudio \_\_\_\_\_

32 Versión \_\_\_\_\_, fecha \_\_\_\_\_  
33  
34  
35  
36  
37  
38  
39  
40  
41  
42  
43  
44  
45  
46  
47  
48  
49  
50  
51  
52  
53  
54  
55  
56  
57  
58  
59  
60

1  
2  
3 **Appendix 2. Checklist SPIRIT**  
4

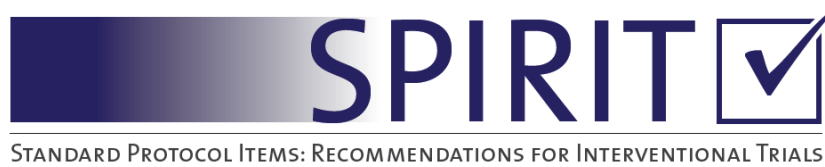

26  
27  
28  
29  
30  
31  
32  
33  
34  
35  
36  
37  
38  
39  
40  
41  
42  
43  
44  
45  
46  
47  
48  
49  
50  
51  
52  
53

6 SPIRIT 2013 Checklist: Recommended items to address in a clinical trial protocol and  
7 related documents\*

| Section/item                      | Item No | Description                                                                                                                                                                                                                                                                              | Addressed on page number |
|-----------------------------------|---------|------------------------------------------------------------------------------------------------------------------------------------------------------------------------------------------------------------------------------------------------------------------------------------------|--------------------------|
| <b>Administrative information</b> |         |                                                                                                                                                                                                                                                                                          |                          |
| Title                             | 1       | Descriptive title identifying the study design, population, interventions, and, if applicable, trial acronym                                                                                                                                                                             | 1                        |
| Trial registration                | 2a      | Trial identifier and registry name. If not yet registered, name of intended registry                                                                                                                                                                                                     | 1-3                      |
|                                   | 2b      | All items from the World Health Organization Trial Registration Data Set                                                                                                                                                                                                                 | 2-3                      |
| Protocol version                  | 3       | Date and version identifier                                                                                                                                                                                                                                                              | N/A                      |
| Funding                           | 4       | Sources and types of financial, material, and other support                                                                                                                                                                                                                              | 22                       |
| Roles and responsibilities        | 5a      | Names, affiliations, and roles of protocol contributors                                                                                                                                                                                                                                  | 22                       |
|                                   | 5b      | Name and contact information for the trial sponsor                                                                                                                                                                                                                                       | 22                       |
|                                   | 5c      | Role of study sponsor and funders, if any, in study design; collection, management, analysis, and interpretation of data; writing of the report; and the decision to submit the report for publication, including whether they will have ultimate authority over any of these activities | N/A                      |
|                                   | 5d      | Composition, roles, and responsibilities of the coordinating centre, steering committee, endpoint adjudication committee, data management team, and other individuals or groups overseeing the trial, if applicable (see Item 21a for data monitoring committee)                         | N/A                      |
| <b>Introduction</b>               |         |                                                                                                                                                                                                                                                                                          |                          |
| Background and rationale          | 6a      | Description of research question and justification for undertaking the trial, including summary of relevant studies (published and unpublished) examining benefits and harms for each intervention                                                                                       | 3-5                      |
|                                   | 6b      | Explanation for choice of comparators                                                                                                                                                                                                                                                    | 3-5                      |
| Objectives                        | 7       | Specific objectives or hypotheses                                                                                                                                                                                                                                                        | 5-6                      |

|                                                                     |     |                                                                                                                                                                                                                                                                                                                                                                                |       |
|---------------------------------------------------------------------|-----|--------------------------------------------------------------------------------------------------------------------------------------------------------------------------------------------------------------------------------------------------------------------------------------------------------------------------------------------------------------------------------|-------|
| Trial design                                                        | 8   | Description of trial design including type of trial (eg, parallel group, crossover, factorial, single group), allocation ratio, and framework (eg, superiority, equivalence, noninferiority, exploratory)                                                                                                                                                                      | 6     |
| <b>Methods: Participants, interventions, and outcomes</b>           |     |                                                                                                                                                                                                                                                                                                                                                                                |       |
| Study setting                                                       | 9   | Description of study settings (eg, community clinic, academic hospital) and list of countries where data will be collected. Reference to where list of study sites can be obtained                                                                                                                                                                                             | 6     |
| Eligibility criteria                                                | 10  | Inclusion and exclusion criteria for participants. If applicable, eligibility criteria for study centres and individuals who will perform the interventions (eg, surgeons, psychotherapists)                                                                                                                                                                                   | 7     |
| Interventions                                                       | 11a | Interventions for each group with sufficient detail to allow replication, including how and when they will be administered                                                                                                                                                                                                                                                     | 7-9   |
|                                                                     | 11b | Criteria for discontinuing or modifying allocated interventions for a given trial participant (eg, drug dose change in response to harms, participant request, or improving/worsening disease)                                                                                                                                                                                 | N/A   |
|                                                                     | 11c | Strategies to improve adherence to intervention protocols, and any procedures for monitoring adherence (eg, drug tablet return, laboratory tests)                                                                                                                                                                                                                              | 8     |
|                                                                     | 11d | Relevant concomitant care and interventions that are permitted or prohibited during the trial                                                                                                                                                                                                                                                                                  | 8     |
| Outcomes                                                            | 12  | Primary, secondary, and other outcomes, including the specific measurement variable (eg, systolic blood pressure), analysis metric (eg, change from baseline, final value, time to event), method of aggregation (eg, median, proportion), and time point for each outcome. Explanation of the clinical relevance of chosen efficacy and harm outcomes is strongly recommended | 9-11  |
| Participant timeline                                                | 13  | Time schedule of enrolment, interventions (including any run-ins and washouts), assessments, and visits for participants. A schematic diagram is highly recommended (see Figure)                                                                                                                                                                                               | 11    |
| Sample size                                                         | 14  | Estimated number of participants needed to achieve study objectives and how it was determined, including clinical and statistical assumptions supporting any sample size calculations                                                                                                                                                                                          | 11-12 |
| Recruitment                                                         | 15  | Strategies for achieving adequate participant enrolment to reach target sample size                                                                                                                                                                                                                                                                                            | 12    |
| <b>Methods: Assignment of interventions (for controlled trials)</b> |     |                                                                                                                                                                                                                                                                                                                                                                                |       |
| Allocation:                                                         |     |                                                                                                                                                                                                                                                                                                                                                                                |       |
| Sequence generation                                                 | 16a | Method of generating the allocation sequence (eg, computer-generated random numbers), and list of any factors for stratification. To reduce predictability of a random sequence, details of any planned restriction (eg, blocking) should be provided in a separate document that is unavailable to those who enrol participants or assign interventions                       | 12-13 |
| Allocation concealment mechanism                                    | 16b | Mechanism of implementing the allocation sequence (eg, central telephone; sequentially numbered, opaque, sealed envelopes), describing any steps to conceal the sequence until interventions are assigned                                                                                                                                                                      | 12-13 |

|    |                                                           |     |                                                                                                                                                                                                                                                                                                                                                                                                              |       |
|----|-----------------------------------------------------------|-----|--------------------------------------------------------------------------------------------------------------------------------------------------------------------------------------------------------------------------------------------------------------------------------------------------------------------------------------------------------------------------------------------------------------|-------|
| 1  |                                                           |     |                                                                                                                                                                                                                                                                                                                                                                                                              |       |
| 2  |                                                           |     |                                                                                                                                                                                                                                                                                                                                                                                                              |       |
| 3  |                                                           |     |                                                                                                                                                                                                                                                                                                                                                                                                              |       |
| 4  | Implemen                                                  | 16c | Who will generate the allocation sequence, who will enrol participants, and who will assign participants to interventions                                                                                                                                                                                                                                                                                    | 13    |
| 5  | tation                                                    |     |                                                                                                                                                                                                                                                                                                                                                                                                              |       |
| 6  | Blinding                                                  | 17a | Who will be blinded after assignment to interventions (eg, trial participants, care providers, outcome assessors, data analysts), and how                                                                                                                                                                                                                                                                    | 13    |
| 7  | (masking)                                                 |     |                                                                                                                                                                                                                                                                                                                                                                                                              |       |
| 8  |                                                           | 17b | If blinded, circumstances under which unblinding is permissible, and procedure for revealing a participant's allocated intervention during the trial                                                                                                                                                                                                                                                         | 13    |
| 9  |                                                           |     |                                                                                                                                                                                                                                                                                                                                                                                                              |       |
| 10 |                                                           |     |                                                                                                                                                                                                                                                                                                                                                                                                              |       |
| 11 |                                                           |     |                                                                                                                                                                                                                                                                                                                                                                                                              |       |
| 12 |                                                           |     |                                                                                                                                                                                                                                                                                                                                                                                                              |       |
| 13 | <b>Methods: Data collection, management, and analysis</b> |     |                                                                                                                                                                                                                                                                                                                                                                                                              |       |
| 14 |                                                           |     |                                                                                                                                                                                                                                                                                                                                                                                                              |       |
| 15 | Data                                                      | 18a | Plans for assessment and collection of outcome, baseline, and other trial data, including any related processes to promote data quality (eg, duplicate measurements, training of assessors) and a description of study instruments (eg, questionnaires, laboratory tests) along with their reliability and validity, if known. Reference to where data collection forms can be found, if not in the protocol | 13-14 |
| 16 | collection                                                |     |                                                                                                                                                                                                                                                                                                                                                                                                              |       |
| 17 | methods                                                   |     |                                                                                                                                                                                                                                                                                                                                                                                                              |       |
| 18 |                                                           | 18b | Plans to promote participant retention and complete follow-up, including list of any outcome data to be collected for participants who discontinue or deviate from intervention protocols                                                                                                                                                                                                                    | N/A   |
| 19 |                                                           |     |                                                                                                                                                                                                                                                                                                                                                                                                              |       |
| 20 |                                                           |     |                                                                                                                                                                                                                                                                                                                                                                                                              |       |
| 21 |                                                           |     |                                                                                                                                                                                                                                                                                                                                                                                                              |       |
| 22 |                                                           |     |                                                                                                                                                                                                                                                                                                                                                                                                              |       |
| 23 | Data                                                      | 19  | Plans for data entry, coding, security, and storage, including any related processes to promote data quality (eg, double data entry; range checks for data values). Reference to where details of data management procedures can be found, if not in the protocol                                                                                                                                            | 14    |
| 24 | management                                                |     |                                                                                                                                                                                                                                                                                                                                                                                                              |       |
| 25 |                                                           |     |                                                                                                                                                                                                                                                                                                                                                                                                              |       |
| 26 |                                                           |     |                                                                                                                                                                                                                                                                                                                                                                                                              |       |
| 27 |                                                           |     |                                                                                                                                                                                                                                                                                                                                                                                                              |       |
| 28 |                                                           |     |                                                                                                                                                                                                                                                                                                                                                                                                              |       |
| 29 |                                                           |     |                                                                                                                                                                                                                                                                                                                                                                                                              |       |
| 30 | Statistical                                               | 20a | Statistical methods for analysing primary and secondary outcomes. Reference to where other details of the statistical analysis plan can be found, if not in the protocol                                                                                                                                                                                                                                     | 14    |
| 31 | methods                                                   |     |                                                                                                                                                                                                                                                                                                                                                                                                              |       |
| 32 |                                                           | 20b | Methods for any additional analyses (eg, subgroup and adjusted analyses)                                                                                                                                                                                                                                                                                                                                     | 14    |
| 33 |                                                           |     |                                                                                                                                                                                                                                                                                                                                                                                                              |       |
| 34 |                                                           | 20c | Definition of analysis population relating to protocol non-adherence (eg, as randomised analysis), and any statistical methods to handle missing data (eg, multiple imputation)                                                                                                                                                                                                                              | 14    |
| 35 |                                                           |     |                                                                                                                                                                                                                                                                                                                                                                                                              |       |
| 36 |                                                           |     |                                                                                                                                                                                                                                                                                                                                                                                                              |       |
| 37 |                                                           |     |                                                                                                                                                                                                                                                                                                                                                                                                              |       |
| 38 |                                                           |     |                                                                                                                                                                                                                                                                                                                                                                                                              |       |
| 39 | <b>Methods: Monitoring</b>                                |     |                                                                                                                                                                                                                                                                                                                                                                                                              |       |
| 40 |                                                           |     |                                                                                                                                                                                                                                                                                                                                                                                                              |       |
| 41 |                                                           |     |                                                                                                                                                                                                                                                                                                                                                                                                              |       |
| 42 | Data                                                      | 21a | Composition of data monitoring committee (DMC); summary of its role and reporting structure; statement of whether it is independent from the sponsor and competing interests; and reference to where further details about its charter can be found, if not in the protocol. Alternatively, an explanation of why a DMC is not needed                                                                        | -     |
| 43 | monitoring                                                |     |                                                                                                                                                                                                                                                                                                                                                                                                              |       |
| 44 |                                                           | 21b | Description of any interim analyses and stopping guidelines, including who will have access to these interim results and make the final decision to terminate the trial                                                                                                                                                                                                                                      | -     |
| 45 |                                                           |     |                                                                                                                                                                                                                                                                                                                                                                                                              |       |
| 46 |                                                           |     |                                                                                                                                                                                                                                                                                                                                                                                                              |       |
| 47 |                                                           |     |                                                                                                                                                                                                                                                                                                                                                                                                              |       |
| 48 |                                                           |     |                                                                                                                                                                                                                                                                                                                                                                                                              |       |
| 49 |                                                           |     |                                                                                                                                                                                                                                                                                                                                                                                                              |       |
| 50 |                                                           |     |                                                                                                                                                                                                                                                                                                                                                                                                              |       |
| 51 | Harms                                                     | 22  | Plans for collecting, assessing, reporting, and managing solicited and spontaneously reported adverse events and other unintended effects of trial interventions or trial conduct                                                                                                                                                                                                                            | -     |
| 52 |                                                           |     |                                                                                                                                                                                                                                                                                                                                                                                                              |       |
| 53 |                                                           |     |                                                                                                                                                                                                                                                                                                                                                                                                              |       |
| 54 | Auditing                                                  | 23  | Frequency and procedures for auditing trial conduct, if any, and whether the process will be independent from investigators and the sponsor                                                                                                                                                                                                                                                                  | N/A   |
| 55 |                                                           |     |                                                                                                                                                                                                                                                                                                                                                                                                              |       |
| 56 |                                                           |     |                                                                                                                                                                                                                                                                                                                                                                                                              |       |
| 57 |                                                           |     |                                                                                                                                                                                                                                                                                                                                                                                                              |       |
| 58 | <b>Ethics and dissemination</b>                           |     |                                                                                                                                                                                                                                                                                                                                                                                                              |       |
| 59 |                                                           |     |                                                                                                                                                                                                                                                                                                                                                                                                              |       |
| 60 |                                                           |     |                                                                                                                                                                                                                                                                                                                                                                                                              |       |

|                               |     |                                                                                                                                                                                                                                                                                     |     |
|-------------------------------|-----|-------------------------------------------------------------------------------------------------------------------------------------------------------------------------------------------------------------------------------------------------------------------------------------|-----|
| Research ethics approval      | 24  | Plans for seeking research ethics committee/institutional review board (REC/IRB) approval                                                                                                                                                                                           | 15  |
| Protocol amendments           | 25  | Plans for communicating important protocol modifications (eg, changes to eligibility criteria, outcomes, analyses) to relevant parties (eg, investigators, REC/IRBs, trial participants, trial registries, journals, regulators)                                                    | 15  |
| Consent or assent             | 26a | Who will obtain informed consent or assent from potential trial participants or authorised surrogates, and how (see Item 32)                                                                                                                                                        | 15  |
|                               | 26b | Additional consent provisions for collection and use of participant data and biological specimens in ancillary studies, if applicable                                                                                                                                               |     |
| Confidentiality               | 27  | How personal information about potential and enrolled participants will be collected, shared, and maintained in order to protect confidentiality before, during, and after the trial                                                                                                | 15  |
| Declaration of interests      | 28  | Financial and other competing interests for principal investigators for the overall trial and each study site                                                                                                                                                                       |     |
| Access to data                | 29  | Statement of who will have access to the final trial dataset, and disclosure of contractual agreements that limit such access for investigators                                                                                                                                     | 15  |
| Ancillary and post-trial care | 30  | Provisions, if any, for ancillary and post-trial care, and for compensation to those who suffer harm from trial participation                                                                                                                                                       | -   |
| Dissemination policy          | 31a | Plans for investigators and sponsor to communicate trial results to participants, healthcare professionals, the public, and other relevant groups (eg, via publication, reporting in results databases, or other data sharing arrangements), including any publication restrictions | -   |
|                               | 31b | Authorship eligibility guidelines and any intended use of professional writers                                                                                                                                                                                                      |     |
|                               | 31c | Plans, if any, for granting public access to the full protocol, participant-level dataset, and statistical code                                                                                                                                                                     |     |
| <b>Appendices</b>             |     |                                                                                                                                                                                                                                                                                     |     |
| Informed consent materials    | 32  | Model consent form and other related documentation given to participants and authorised surrogates                                                                                                                                                                                  | N/A |
| Biological specimens          | 33  | Plans for collection, laboratory evaluation, and storage of biological specimens for genetic or molecular analysis in the current trial and for future use in ancillary studies, if applicable                                                                                      | N/A |

8

# BMJ Open

## A comparative study of treatment interventions for patellar tendinopathy: a protocol for a randomized controlled trial

|                                 |                                                                                                                                                                                                                                                                                                                                                                                                                                                                                                                                                                                                                                                                                                                                                                                                                                                |
|---------------------------------|------------------------------------------------------------------------------------------------------------------------------------------------------------------------------------------------------------------------------------------------------------------------------------------------------------------------------------------------------------------------------------------------------------------------------------------------------------------------------------------------------------------------------------------------------------------------------------------------------------------------------------------------------------------------------------------------------------------------------------------------------------------------------------------------------------------------------------------------|
| Journal:                        | <i>BMJ Open</i>                                                                                                                                                                                                                                                                                                                                                                                                                                                                                                                                                                                                                                                                                                                                                                                                                                |
| Manuscript ID                   | bmjopen-2019-034304.R3                                                                                                                                                                                                                                                                                                                                                                                                                                                                                                                                                                                                                                                                                                                                                                                                                         |
| Article Type:                   | Protocol                                                                                                                                                                                                                                                                                                                                                                                                                                                                                                                                                                                                                                                                                                                                                                                                                                       |
| Date Submitted by the Author:   | 17-Jan-2020                                                                                                                                                                                                                                                                                                                                                                                                                                                                                                                                                                                                                                                                                                                                                                                                                                    |
| Complete List of Authors:       | Lopez-Royo, Maria Pilar; Universidad San Jorge Facultad de Ciencias de la Salud; Universidad de Zaragoza, Facultad de Ciencias de la Salud y del Deporte<br>Gómez-Trullén, Eva Maria; Universidad de Zaragoza, Facultad de Ciencias de la Salud y del Deporte<br>Ortiz-Lucas, Maria; Universidad San Jorge Facultad de Ciencias de la Salud<br>Galán-Díaz, Rita Maria; Universidad San Jorge Facultad de Ciencias de la Salud<br>Bataller-Cervero, Ana Vanessa; Universidad San Jorge Facultad de Ciencias de la Salud<br>Al-Boloushi, Zaid; Universidad de Zaragoza Facultad de Ciencias, Facultad de Ciencias de la Salud y del Deporte; Kuwait Ministry of Health<br>Hamam-Alcober, Yasmina; Universidad San Jorge Facultad de Ciencias de la Salud, Fisioterapia<br>Herrero, Pablo; Universidad San Jorge Facultad de Ciencias de la Salud |
| <b>Primary Subject Heading</b>: | Rehabilitation medicine                                                                                                                                                                                                                                                                                                                                                                                                                                                                                                                                                                                                                                                                                                                                                                                                                        |
| Secondary Subject Heading:      | Sports and exercise medicine, Pathology                                                                                                                                                                                                                                                                                                                                                                                                                                                                                                                                                                                                                                                                                                                                                                                                        |
| Keywords:                       | Eccentric Exercise, Tendinopathy, Percutaneous Needle Electrolysis, Dry Needling                                                                                                                                                                                                                                                                                                                                                                                                                                                                                                                                                                                                                                                                                                                                                               |
|                                 |                                                                                                                                                                                                                                                                                                                                                                                                                                                                                                                                                                                                                                                                                                                                                                                                                                                |

SCHOLARONE™  
Manuscripts



I, the Submitting Author has the right to grant and does grant on behalf of all authors of the Work (as defined in the below author licence), an exclusive licence and/or a non-exclusive licence for contributions from authors who are: i) UK Crown employees; ii) where BMJ has agreed a CC-BY licence shall apply, and/or iii) in accordance with the terms applicable for US Federal Government officers or employees acting as part of their official duties; on a worldwide, perpetual, irrevocable, royalty-free basis to BMJ Publishing Group Ltd ("BMJ") its licensees and where the relevant Journal is co-owned by BMJ to the co-owners of the Journal, to publish the Work in this journal and any other BMJ products and to exploit all rights, as set out in our [licence](#).

The Submitting Author accepts and understands that any supply made under these terms is made by BMJ to the Submitting Author unless you are acting as an employee on behalf of your employer or a postgraduate student of an affiliated institution which is paying any applicable article publishing charge ("APC") for Open Access articles. Where the Submitting Author wishes to make the Work available on an Open Access basis (and intends to pay the relevant APC), the terms of reuse of such Open Access shall be governed by a Creative Commons licence – details of these licences and which [Creative Commons](#) licence will apply to this Work are set out in our licence referred to above.

Other than as permitted in any relevant BMJ Author's Self Archiving Policies, I confirm this Work has not been accepted for publication elsewhere, is not being considered for publication elsewhere and does not duplicate material already published. I confirm all authors consent to publication of this Work and authorise the granting of this licence.



1  
2  
3 A comparative study of treatment interventions for patellar tendinopathy: a protocol for  
4  
5 a randomized controlled trial  
6  
7

8 López-Royo MP<sup>a,b</sup>, Gómez-Trullén EM<sup>b</sup>, Ortiz-Lucas M<sup>a</sup>, Galán-Díaz RM<sup>a</sup>, Bataller-Cervero  
9  
10 AV<sup>a</sup>, Al-Boloushi Z<sup>b,c</sup>, Hamam-Alcober Y<sup>a</sup>, Herrero P<sup>a\*</sup>  
11  
12

13 **AFFILIATIONS**  
14

- 15  
16 **A.** iPhysio Research Group. Universidad San Jorge. Campus Universitario, Autov.  
17 A23 km 299, 50830. Villanueva de Gállego, Zaragoza, Spain.  
18  
19 **B.** Universidad de Zaragoza. Facultad de Ciencias de la Salud y del Deporte. Dpto.  
20 de Fisiatría y Enfermería. C/ Domingo Miral s/n, 50009 - Zaragoza, Spain.  
21  
22 **A.** Ministry of Health, State of Kuwait. Jamal Abdunnasser Street, Al Solaibeykhat  
23 Area 5. Kuwait City. Safat 13001.  
24  
25  
26  
27  
28  
29  
30  
31  
32

33 **\*CORRESPONDENCE TO:**  
34

35  
36 Dr. Pablo Herrero. iPhysio Research Group. Universidad San Jorge. Campus  
37 Universitario, Autov A23, Km 299, 50830 Villanueva de Gállego, Zaragoza, Spain.  
38  
39 Tel.: (+34) 976 060 100 Fax: 976 077 581. Email: pherrero@usj.es  
40  
41  
42

43 **ADDITIONAL AUTHOR INFORMATION**  
44

45  
46 Maria Pilar López Royo. Emails: mplopez@usj.es  
47  
48

49 Eva María Gómez Trullén. Email: evagomez@unizar.es  
50  
51

52 María Ortiz Lucas. Email: mariaortizlucas@gmail.com  
53  
54

55 Rita María Galán Díaz. Email: rmgalan@usj.es  
56  
57

58 Ana Vanessa Bataller-Cervero. Email: avbataller@usj.es  
59  
60

1  
2  
3 Yasmina Hamam-Alcober. Email: yhamam@usj.es  
4  
5

6 Zaid AL-boloushi. Email: boloushi@me.com  
7  
8  
9

10  
11  
12 **WORD COUNT:** 3967 words.  
13  
14  
15

## 16 17 **ABSTRACT**

18  
19 **Introduction:** Patellar tendinopathy is a degenerative disease of the patellar tendon,  
20 which affects athletes from a variety of sports, and is especially predominant in sports  
21 involving high-impact jumping. The aim of this study is to compare the effectiveness of  
22 three therapies in order to determine the most effective treatment protocol of patellar  
23 tendinopathy.  
24  
25  
26  
27  
28  
29

30  
31 **Methods and analysis:** This study is a randomized controlled trial with blinded  
32 participants. Measurements will be carried out by a specially trained blinded assessor. A  
33 sample of 57 patients with a medical diagnosis of patellar tendinopathy will participate  
34 in this study and will be divided into three treatment groups. Eligible participants will be  
35 randomly allocated to receive either: (a) treatment group with Percutaneous Needle  
36 Electrolysis, (b) treatment group with Dry Needling or (c) treatment group with placebo  
37 needling. In addition, all groups will perform eccentric exercise. Functionality and muscle  
38 strength parameters, pain, ultrasound appearances and patient perceived quality of life  
39 shall be evaluated using the VISA-p, jump test, VAS, US images and SF-36, respectively.  
40  
41  
42  
43  
44  
45  
46  
47  
48  
49  
50  
51  
52  
53  
54  
55  
56  
57  
58  
59  
60  
Participants will be assessed at baseline, at 10 weeks and at 22 weeks after baseline. The  
expected findings will allow us to advance in the treatment of this injury, as they will help  
determine whether a needling intervention has additional effects on an eccentric exercise  
program and whether any of the needling modalities is more effective than the other.

1  
2  
3 **Ethics and dissemination:** This protocol has been approved by the Ethics Committee of  
4 Aragon (N° PI15/0017). The trial will be conducted in accordance with the Declaration  
5 of Helsinki.  
6  
7

8  
9 **Trial Registration Number:** NCT02498795.  
10  
11

### 12 13 14 **Strengths and limitations of this study**

- 15  
16  
17 - This randomized clinical trial will report the effects on functionality and pain of three  
18 different treatment interventions in both the short and long term.  
19  
20  
21 - The double-blinded and placebo-control design will enhance objectivity and help reduce  
22 bias.  
23  
24  
25 - The effects of two minimally invasive treatments in physical therapy will be compared  
26 for the first time in patellar tendinopathy.  
27  
28  
29  
30  
31  
32

## 33 **INTRODUCTION**

34  
35 Patellar tendinopathy (PT), also known as jumper's knee, is a degenerative condition  
36 affecting the patellar tendon resulting in anterior knee pain associated with focal and  
37 palpable tenderness at the inferior pole of the patella. This disorder has similar histologic  
38 findings to other tendon disorders characterized by an increased thickness of the tendon  
39 and changes in vascularity, and cellularity, with incompletely healed tendon micro-  
40 ruptures and disturbed collagen distribution(1).  
41  
42  
43  
44  
45  
46  
47  
48

49 This degenerative condition affects athletes from a variety of sports, and is especially  
50 predominant in sports involving high-impact jumping. The overall prevalence of PT in  
51 non-elite players is 8.5%, although this figure increases in sports that place high demands  
52 on the patellar ligament, increasing up to 14.2% in volleyball athletes. Among elite  
53 volleyball and basketball players, a prevalence of 45% and 32%, respectively, has been  
54  
55  
56  
57  
58  
59  
60

1  
2  
3 reported. In addition, jumper's knee is almost twice as common among male non-elite  
4 athletes when compared with female athletes(2).

7 The diagnosis is typically based on the clinical history and symptomatic findings.  
8  
9 Currently, imaging techniques, such as color-Doppler ultrasound (CD-US) and gray scale  
10 ultrasound (GS-US) can be used for the assessment of the patellar tendon to clinically  
11 confirm the diagnosis(3).  
12  
13  
14

16 Treatments used for PT fall into two major groups. The first group comprises medical  
17 treatments which include non-steroidal anti-inflammatory drugs (NSAIDs), platelet-rich  
18 plasma injection(4) and autologous growth factors(5). The second group consists of  
19 physical therapies, including both conservative and invasive approaches (needling  
20 techniques).  
21  
22  
23  
24  
25  
26  
27

28 Conservative therapies are generally accepted as the first line of approach for managing  
29 PT(6, 7), considering exercise as the gold standard of treatment, either eccentric exercise  
30 (EE) or high slow resistance training programs. Both have demonstrated similar  
31 effectiveness in the treatment of PT(6-8). In 2012, EE was shown to be effective in the  
32 treatment of tendinopathies at various locations of the body, including PT, with a greater  
33 likelihood of clinical improvement when performed on a declined surface(6, 8, 9). In  
34 recent years, further evidence now supports the fact that exercise is more effective than  
35 other conventional treatments in tendinopathy, such as iontophoresis, US, Cyriax  
36 treatment, etc.(10).  
37  
38  
39  
40  
41  
42  
43  
44  
45  
46  
47  
48

49 Physical therapy approaches for PT continue to evolve and a number of innovative  
50 treatment options are now available, such as dry needling (DN)(11), electrotherapeutic  
51 invasive modalities (e.g. electrolysis)(12-14) and extracorporeal shockwave (ECSW)  
52 therapy(15). Recently, research has focused on regenerative therapies with high  
53 expectations of success because some of these techniques seem to achieve a rapid  
54  
55  
56  
57  
58  
59  
60

1  
2  
3 regeneration of the injured tendon(11, 12, 16). However, evidence-based regenerative  
4 therapies are limited and there is no agreement to date regarding which of these is the  
5 most effective(17). DN consists of the insertion of a needle (filiform and solid, non-  
6 beveled) with the aim of provoking a local injury leading to an inflammatory response  
7 and the subsequent regeneration of the injured area in approximately one week. A study  
8 performed by Abat et al. reported that DN induced histological and mechanical changes  
9 in rat Achilles tendons at week one, with changes persisting at week four(18).  
10 Percutaneous Needle Electrolysis (PNE) is an ultrasound-guided technique used by  
11 physiotherapists consisting of causing localized lysis in the damaged and/or degenerated  
12 tissue by means of a galvanic current transmitted through an acupuncture needle. This  
13 technique may affect inflammatory mediators in damaged muscle tissue and influence the  
14 new vascularization of the injured area in rats(18). James et al.(11) carried out a cohort  
15 study in humans analyzing one group treated with DN and another treated with autologous  
16 blood injections. In both cases, they found improvements compared to the baseline  
17 measurements. However, this study failed to find differences between the different  
18 treatments, concluding that both techniques were equally effective. In relation to PNE, a  
19 former study(14) analyzed the treatment effect of electrolysis applied once a week in a  
20 group of patients without any control or comparative group, reporting that patients  
21 obtained statistically and clinically significant improvements compared to baseline  
22 measurements.

23  
24 From a biological point of view, it seems reasonable to hypothesize that a patient will  
25 obtain benefits thanks to the mechanical effects provided by the needle(16), and that  
26 patients may benefit more if the electrolysis effect is added to the mechanical stimuli  
27 provided by the needle(19).  
28  
29  
30  
31  
32  
33  
34  
35  
36  
37  
38  
39  
40  
41  
42  
43  
44  
45  
46  
47  
48  
49  
50  
51  
52  
53  
54  
55  
56  
57  
58  
59  
60

1  
2  
3 Therefore, the aim of this study is to determine the additional effect of two interventions  
4 combined with EE and compare which one is the most effective at short and long-term  
5 follow-up for patients with PT.  
6  
7  
8  
9  
10

## 11 **METHODS AND ANALYSIS**

### 12 **Study design**

13  
14  
15 The trial is designed as a randomized, controlled, participant, investigator and outcomes  
16 assessor blinded, experimental study, aimed at comparing three different physiotherapy  
17 protocols applied in three intervention groups of PT patients. Randomization will be  
18 performed as block randomization with a 1:1:1 allocation.  
19  
20  
21  
22  
23  
24

25  
26 This protocol follows the standards of the Helsinki Convention of good clinical practices.  
27  
28 The Ethics Committee of Aragon (CEICA) has evaluated the project and has given its  
29 favorable opinion and support, N° PI15/0017 (Appendix 1).  
30  
31

32  
33 The study has been carried out following the SPIRIT statement for clinical trial protocol  
34 and a SPIRIT Checklist has been included (Appendix 2).  
35  
36  
37  
38  
39

### 40 **Study setting**

41  
42 After reviewing the literature and observing the high incidence of this pathology in  
43 amateur young adult athletes who perform sports and more specifically, jump sports,  
44 patient recruitment has been performed in basketball, football, volleyball, CrossFit, and  
45 handball sports clubs, together with running clubs and several gyms located in the city. A  
46 decision was made to conduct the study in X, where the university is located, as well as  
47 the laboratory to be used for assessments and treatments.  
48  
49  
50  
51  
52

53  
54 The assessments will be conducted at the Motion Analysis laboratory of X, and the  
55 treatment will be performed at two different sites depending on the availability of both  
56 spaces and of schedules. Nonetheless, the same material will always be used.  
57  
58  
59  
60

## Participants

### *Inclusion criteria*

Participants eligible for inclusion in this study must meet the following criteria: 1. History of PT and anterior knee pain located on the inferior pole of the patella for over three months; 2. Aged between 18 and 45 years; 3. Palpation tenderness of the superior insertion of the patellar tendon; 4. A score below 80 on the VISA-p questionnaire.

### *Exclusion criteria*

Exclusion criteria for the study are: 1. Knee surgery within the previous six months; 2. Chronic joint diseases; 3. Corticosteroid injection in the patellar tendon within the previous three months; 4. Contraindications for needling; 5. Use of drugs 48 hours previously (e.g. NSAIDs); 6. Any other concomitant treatment for PT.

## Methodology

In the first session, all participants will be instructed on how to perform a daily home program of EE. This will consist of performing three sets of 15 single leg squat repetitions on a decline board every day, according to Alfredson's protocol(20) increasing the speed if participants do not have pain. Participants will be informed that exercise is allowed to reach 5 in a numerical pain rating scale(21), and if it is higher then they will stop and notify the researcher, attempting once again 24 h later following the same rules.

For the interventions, the participants will be placed in a supine position with a pillow under the knee (approximately 20° of knee flexion). The area will be cleansed with an antiseptic solution (70% Propan-2-ol, Skin-des). An ultrasound probe cover will be used during the intervention for infectious control. To determine the relevant treatment area, two factors will be considered: 1) Palpation of the areas exhibiting higher sensitivity and

1  
2  
3 that reproduce the patient's symptoms; 2) Tendon areas showing degenerative changes  
4  
5 assessed under ultrasound. Each group will receive a total of four sessions distributed  
6  
7 throughout eight weeks of treatment, once every two weeks.  
8  
9

10  
11  
12 *DN intervention combined with EE (DN-G) and PNE intervention combined with EE*  
13  
14 *(PNE-G)*

15  
16 Specific DN needles will be used during needling treatments, (Agu-punt, Spain).  
17  
18 Considering the thickness of the tendon and the approach, we shall use needles measuring  
19  
20 0.25 x 25 mm. The procedure will be guided by US to ensure the specificity of application  
21  
22 on the injured area and to guarantee that the procedure is safe for the patient. The DN  
23  
24 needle will reach the relevant treatment area (areas with degenerative PT changes). Each  
25  
26 session will consist of three needle insertions lasting three seconds each. In PNE-G  
27  
28 applications, an intensity of 3 mA galvanic current will be used during the three seconds  
29  
30 that the procedure lasts(19). The dose of 3 mA has demonstrated to be as effective as 6  
31  
32 mA in the treatment of tendinopathy injuries in animal models(18,19). In humans, a study  
33  
34 conducted in 2016 showed that a dose of 3 mA in PT generated structural changes  
35  
36 compatible with tendon regeneration, together with improvement of functionality and  
37  
38 pain (22). In contrast, the same study found that lower doses were effective only for the  
39  
40 improvement of functionality and pain. As a result, a 3 mA dose was selected for this  
41  
42 study.  
43  
44  
45  
46  
47  
48  
49  
50

51 *Control group (CG)*

52  
53 A sham needle will be placed upon the treatment zone, simulating the same procedure as  
54  
55 the rest of participants enrolled in the other groups. The needle will be placed in a specific  
56  
57 holder and will be manipulated during the intervention to simulate a real treatment. This  
58  
59  
60



holder will have a cover over the bottom part of the same in order to avoid the needle contacting the skin.

## Outcomes

### *Baseline data*

Baseline data will include gender, age, height, weight, body-mass index, affected side, level, sports and frequency of physical activity, duration of symptoms, medication and previous rehabilitation treatments and infiltrations received. A blinded observer will assess all participants at baseline, 10 weeks and 22 weeks after baseline. Participants will be asked to inform the researchers if there were any changes in medication or if they are receiving any other treatment or infiltration during the study.

### *Primary outcome measure*

Participants will complete the VISA-p questionnaire at baseline. The VISA-p questionnaire is designed to measure the severity of PT(23). The VISA-p score is the primary outcome variable. This scale consists of eight questions, the first six questions of which employ an analogical visual scale in order to assign a score of 0 to 10, where 10 represents the optimum state, for the purpose of quantifying pain and function in different activities, whereas the last two questions assess the level of functionality and ability to perform physical activity.

### *Secondary outcome measure*

During the first evaluation, participants will complete the Visual Analog Scale (VAS), considering the level of pain they feel while practicing their sport's activity. Participants will be explained that a score of 0 indicates the absence of pain whereas a score of 10 represents the maximum tolerable pain. They will also complete a questionnaire to assess their quality of life (SF-36)(24).

1  
2  
3 In order to assess tendon structure, an US evaluation using ultrasound equipment (Logic  
4 S7 Expert, General Electric Healthcare) and a linear probe (MLG-15 5–10 MHz) will be  
5 used. The ultrasonographic assessment protocol will be carried out according to the  
6 Musculoskeletal Ultrasound Technical Guidelines: Knee, defined by the European  
7 Society of Musculoskeletal Radiology(25). The ultrasonographic assessment will consist  
8 of a longitudinal sequence from the tendon origin to the insertion and transverse sections  
9 on the pole of the patella, the tendon body and its insertion on the tibial tuberosity, with  
10 the subject in supine position, with 20° knee flexion, and a pillow under the knee. The  
11 presence of degenerative signs compatible with the medical diagnosis of PT (thickness of  
12 the tendon, hypoechoic areas, irregularities affecting the cortical bone, calcifications) that  
13 could be relevant for the selection of the target area will also be assessed. In addition,  
14 CD-US assessment will be carried out to detect the presence of hypervascularization, with  
15 the subject in supine position and with the knee relaxed in full extension, in order to obtain  
16 further information to specifically define the target area.  
17  
18  
19  
20  
21  
22  
23  
24  
25  
26  
27  
28  
29  
30  
31  
32  
33  
34

35 Upon completion of the evaluation, a jump test will be carried out, measured with a force  
36 platform (FP4060-10-2000, Bertec Corporation). In this evaluation, subjects will warm  
37 up during 5 minutes on a treadmill, subsequently, they will perform dynamic stretches for  
38 the leg muscles. The Jump test will be explained to participants and they will be asked to  
39 demonstrate how they will perform the assessment to ensure that they have understood it  
40 before going to the platform. Later, patients will go to the platform forces and will  
41 perform each jump 3 times (squat jump, Abalakov jump and countermovement jump test)  
42 with 60 seconds between jumps and 2 minutes between different jumps (Table 1)(26-28).  
43 The maximum height of the jump will be analyzed via the measurement of the flight time  
44 recorded on the force platforms, the eccentric power and the maximum concentric force  
45 performed. The Abalakov jump will be performed with the subject standing in an upright  
46  
47  
48  
49  
50  
51  
52  
53  
54  
55  
56  
57  
58  
59  
60

1  
2  
3 position with a full arm swing. A rapid downward movement will be immediately  
4 followed by a rapid upward vertical movement as high as possible, all in one sequence.  
5  
6 The same procedure will be applied for the CMJ jump, however, this test will be  
7 performed with the hands on the hips to avoid arm swings. Finally, a Squat Jump will be  
8 performed with 90 degrees of flexion of the knee.  
9  
10  
11  
12  
13  
14  
15  
16

### 17 **Participant timeline**

18  
19 The study design will be a double-blind randomized controlled trial. The flow chart of  
20 the trial is shown in Figure 1 and the check list SPIRIT schedule is shown in Figure 2.  
21  
22  
23  
24  
25

### 26 **'Patient and Public Involvement'**

27  
28 Patients with PT were not involved in setting the research question or the outcome  
29 measures, however the concept of patient involvement translated to the execution phases  
30 of the research. Patients and their families were central to the dissemination of the  
31 information, which helped to recruit study participants. We intend to disseminate the main  
32 results to trial participants and will seek patient and public involvement in the  
33 development of an appropriate method of dissemination.  
34  
35  
36  
37  
38  
39  
40  
41  
42  
43  
44

### 45 **Sample size**

46  
47 Regarding the sample size, a calculation of statistical power was made prior to the study.  
48  
49 Accepting an alpha risk of 0.05 and a beta risk in a bilateral contrast, 19 subjects are  
50 needed in every treatment group to detect a difference equal or superior to 15 points on  
51 the VISA-p scale and assuming a standard deviation of 15 points(29). The estimated rate  
52 of loss to follow-up is 20%.  
53  
54  
55  
56  
57  
58  
59  
60

1  
2  
3 Recruitment of subjects for the trial will take place between October 2018 and March  
4  
5 2020 and will be carried out by means of informative campaigns targeted at different  
6  
7 Sports Clubs and Federations by means of e-mail and advertisements in the different  
8  
9 University mass media.

10  
11  
12 The interested subjects will receive an e-mail explaining the inclusion and exclusion  
13  
14 criteria, as well as the purpose of the study. If they meet the defined criteria, they will be  
15  
16 invited to send us their medical diagnosis.  
17  
18  
19  
20

### 21 **Recruitment**

22  
23 Participants will be recruited from sports clubs by the physiotherapist or the coach.  
24  
25 Contact has been made with various orthopedists who will collaborate with recruitment,  
26  
27 so that when they establish a diagnosis of this pathology in their examination room they  
28  
29 can refer us to the patients for their recruitment to the study.  
30  
31  
32  
33  
34

### 35 **Allocation**

36  
37 Participants will be randomly assigned to either CG or DN-G or PNE-G with a 1:1:1  
38  
39 allocation using an opaque envelope, with a block size of fifteen participants (5 for each  
40  
41 group).  
42  
43

44 Sealed opaque randomization envelopes with a study-specific participant number will be  
45  
46 supplied by an external statistician. A colleague not involved in the research study will  
47  
48 take the sealed opaque numbered envelopes in order, by number, and deliver the correct  
49  
50 envelope to the treating physical therapist. The envelope will contain a piece of paper,  
51  
52 which will be labelled with the same participant specific number, plus the group  
53  
54 assignment (PNE-G, DN-G or CG).  
55  
56  
57  
58  
59  
60

1  
2  
3 Participants who fulfill the inclusion criteria will receive the standardized oral and written  
4 information, and, once they grant their consent to take part in the trial, they will be  
5  
6 randomized into the three groups.  
7  
8  
9

## 10 11 12 **Blinding**

13  
14 Assessments regarding clinical recovery will be conducted by an assessor blinded to  
15 treatment allocation. Due to the nature of the intervention, participants can be blinded to  
16 allocation. Patients will be explained that they are going to receive a needling treatment,  
17 that it may be slightly painful, and that if at any time they are unable to tolerate the pain  
18 they must inform the researcher to stop the intervention. In order to blind patients, all the  
19 interventions were made with the ultrasound and the PNE device connected to simulate  
20 the same intervention in all groups. In contrast, the physiotherapist performing the  
21 intervention cannot be blinded, however he/she will be instructed not to disclose the  
22 allocation status of the participant at any time or during the follow up assessments. An  
23 employee outside the research team will feed data into the computer in separate datasheets  
24 so that the researchers can analyze data without having access to information about the  
25 allocation.  
26  
27  
28  
29  
30  
31  
32  
33  
34  
35  
36  
37  
38  
39  
40  
41

42 With the intention of evaluating patient blinding, an online questionnaire will be sent to  
43 participants upon completion of the study, asking them about the treatment they received.  
44  
45  
46  
47  
48

## 49 **Data collection methods**

50  
51 For the data collection, an oral questionnaire will be used containing questions targeted  
52 at collecting baseline data and information concerning the pathology.  
53  
54  
55  
56  
57  
58  
59  
60

1  
2  
3 Different questionnaires and assessment scales (VISA-p, VAS, SF-36) in Spanish will  
4  
5 be given to each participant in paper when they attend the assessment, and they will be  
6  
7 granted sufficient time to complete the same.  
8  
9

### 12 **Data management and statistical analysis**

14 In this study, all data will be entered electronically in the assessment room.

16 Original scales and questionnaires will be entered and kept on a locked file at the  
17  
18 participating site.  
19

21 Participant files are to be stored in numerical order and stored in a secure and accessible  
22  
23 place and manner. Participant files will be maintained in storage for a period of 2 years  
24  
25 after completion of the study.  
26

28 The statistical analysis will be carried out by an intention-to-treat analysis. Variables will  
29  
30 be described in number (percentage) and average (standard deviation) or median  
31  
32 (interquartile range) attending to their distribution. Quantitative variables will be  
33  
34 analyzed with the Shapiro Wilk test in order to confirm their distribution and to determine  
35  
36 correct statistical tests according to these results.  
37  
38

39 Outcomes will be analyzed using mixed linear and logistic regression models considering  
40  
41 participants as a random effect and group of treatment as fixed factors. Baseline  
42  
43 characteristics will be introduced in the model as covariance. Numbers needed to treat  
44  
45 index will also be calculated. The primary aim of the analysis will be to calculate the  
46  
47 difference obtained in the VISA-p score after the intervention (final measurement - initial  
48  
49 measurement). Finally, the magnitude of the effect of the result will be calculated and  
50  
51 therefore its clinical importance, by means of the following formula:  
52  
53

$$54 \quad I^* = \sqrt{\frac{F(1,dfR)}{F(1,dfR) + dfR}}$$

56 The significance level set for all the analysis will be  $p \leq 0.05$ .  
57  
58  
59  
60

## ETHICS AND DISEMINATION

The study design, procedures and informed consent procedure were approved and consequently the study will be carried out in compliance with the Helsinki Declaration of Human Rights. All participants will have to provide written Spanish informed consent.

Appendix 1.

The results for this trial will be published in peer-reviewed international journals or otherwise made publicly available and will be presented at national and international conferences and symposiums irrespective of the outcomes.

Any modifications to the protocol, which may impact the study procedures, potential patient benefits or may affect patient safety, including changes of study objectives, study design, patient population, sample sizes, study procedures, or significant administrative aspects will require a formal amendment to the protocol. Such amendments will be approved by the Ethics Committee prior to implementation and notified to the health authorities in accordance with local regulations.

All study-related information will be stored securely at the study site. All participant information will be stored in locked file cabinets in areas with limited access. All records that contain names or other personal identifiers, such as locator forms and informed consent forms, will be stored identified by code number. All local databases will be secured with password-protected access systems.

**Availability of data and material:** The datasets used and/or analyzed during the current study are available from the corresponding author on reasonable request.

## DISCUSSION

1  
2  
3 This study seeks to investigate the effects of physiotherapy needling techniques on pain,  
4  
5 functionality and quality of life in PT.  
6

7  
8 PT is a common cause of knee pain in cases of degeneration of the patellar tendon. Among  
9  
10 the causes of PT, extrinsic factors (e.g., patellar tendon loading with exercise) and  
11  
12 intrinsic factors (e.g., malalignment, high patella, imbalances) have been proposed(30).  
13  
14 Traditionally, the focus has been on quadriceps strengthening exercises and many reviews  
15  
16 have shown that the effect of the treatment could be estimated to give the patients a 50-  
17  
18 70% change of improvement on pain and functionality(6, 31, 32).  
19

20  
21 Regarding needling treatment, previous studies have shown a great improvement in PT  
22  
23 using PNE in combination with EE, with all patients reporting an improvement at least  
24  
25 one month after treatment(12-14, 18). This is an improvement compared to the minimum  
26  
27 three months needed to improve symptoms by applying other conventional techniques  
28  
29 (pharmacological and biological treatments, cold/heat techniques, shock waves, etc.)  
30  
31 Additionally, in a long-term study conducted in 2013, this technique was shown to  
32  
33 improve symptoms quickly and steadily for at least 10 years(33). These findings  
34  
35 demonstrate that this technique ensures that patients remain pain-free for a long period.  
36  
37 Furthermore, we were only able to find four articles(12-14, 18) addressing the application  
38  
39 of PNE for the recovery of PT, however, none of the articles studied were RCTs, which  
40  
41 entail limited evidence of the effectiveness of this technique.  
42  
43  
44  
45

46  
47 In addition, there are no standardized protocols for the application of PNE, which explains  
48  
49 the great variability in the number of sessions and application time based on the literature.  
50  
51 Therefore, this study aims to facilitate clinical practice and combine the available  
52  
53 methodology criteria in the application of this promising technique.  
54

55  
56 Regarding DN, the literature shows many similarities with PNE, since there is only one  
57  
58 RCT that compares functionality improvements among patients who have received PRP.  
59  
60



1  
2  
3 This study reflected that in the short term PRP had better results for pain and functionality,  
4  
5 however, DN was more effective than PRP after six months(34).  
6

7  
8 For the application of both needling techniques, US-guidance is normally used to be able  
9  
10 to observe firstly the presentation of the tendon, and later to observe the needle and enable  
11  
12 a much more specific treatment approach. However, US has disadvantages including its  
13  
14 operator dependence and the limited ability to rule out intra-articular disease. The  
15  
16 sensitivity and specificity of ultrasonography for patellar tendinopathy is between 58%  
17  
18 and 94%, respectively(35).  
19

20  
21 Moreover, functionality of the tendon is usually measured with the VISA-p(36,37),  
22  
23 whereas jump tests (representing a similar action to that performed in subject's daily  
24  
25 sports) are only evaluated in a few papers(27,38). Countermovement jumps and squat  
26  
27 jumps are the most reliable and valid field tests for the estimation of the explosive power  
28  
29 of the lower limbs in physically active men(39). Thus, we will combine both, in order to  
30  
31 be more accurate in the assessment of the tendon's functionality, and be able to assess  
32  
33 changes that may affect their sport performance.  
34  
35

36  
37 This study has several strengths. First, we will evaluate two techniques that currently lack  
38  
39 strong evidence. However, in doing so, we are contributing to new knowledge in the field  
40  
41 of the recovery of musculoskeletal injuries. Second, the role of invasive techniques will  
42  
43 be determined by comparing the effects between these techniques and a control group.  
44  
45 The reliability of data is ensured, as both patients and the assessor will be blinded. Third,  
46  
47 a sub-analysis with US will be performed to investigate changes in the presence of  
48  
49 calcifications, cortical irregularities, neovascularization, thickness, eco-intensity, eco-  
50  
51 variation and eco-texture of the patellar tendon.  
52  
53  
54  
55  
56  
57  
58  
59  
60

1  
2  
3 However, there are some limitations to this study. Blinding of the physiotherapist  
4 performing the intervention is not possible. Furthermore, follow-up is limited to 22 weeks  
5 after baseline.  
6  
7

8  
9  
10 The findings obtained may help advance the treatment of this injury by identifying the  
11 most effective treatment protocol and to avoid the associated consequences, such as the  
12 prevention of relapses and reducing the potential impact on the musculoskeletal system.  
13  
14  
15

## 16 17 18 19 REFERENCES

- 20  
21  
22 1. Knobloch K. The role of tendon microcirculation in Achilles and patellar  
23 tendinopathy. *Journal of orthopaedic surgery and research*. 2008;3:18.
- 24  
25 2. Zwerver J, Bredeweg SW, van den Akker-Scheek I. Prevalence of Jumper's Knee  
26 Among Nonelite Athletes From Different Sports A Cross-Sectional Survey. *American*  
27 *Journal of Sports Medicine*. 2011;39(9):1984-8.
- 28  
29 3. Stenroth L, Sefa S, Arokoski J, Toyras J. Does Magnetic Resonance Imaging  
30 Provide Superior Reliability for Achilles and Patellar Tendon Cross-Sectional Area  
31 Measurements Compared with Ultrasound Imaging? *Ultrasound Med Biol*.  
32 2019;45(12):3186-98.
- 33  
34 4. Taylor DW, Petrera M, Hendry M, Theodoropoulos JS. A Systematic Review of  
35 the Use of Platelet-Rich Plasma in Sports Medicine as a New Treatment for Tendon and  
36 Ligament Injuries. *Clinical Journal of Sport Medicine*. 2011;21(4):344-52.
- 37  
38 5. Andres BM, Murrell GAC. Treatment of tendinopathy: What works, what does  
39 not, and what is on the horizon. *Clinical Orthopaedics and Related Research*.  
40 2008;466(7):1539-54.
- 41  
42 6. Larsson MEH, Kall I, Nilsson-Helander K. Treatment of patellar tendinopathy-a  
43 systematic review of randomized controlled trials. *Knee Surgery Sports Traumatology*  
44 *Arthroscopy*. 2012;20(8):1632-46.
- 45  
46 7. Kongsgaard M, Kovanen V, Aagaard P, Doessing S, Hansen P, Laursen AH, et  
47 al. Corticosteroid injections, eccentric decline squat training and heavy slow resistance  
48 training in patellar tendinopathy. *Scandinavian Journal of Medicine & Science in Sports*.  
49 2009;19(6):790-802.  
50  
51  
52  
53  
54  
55  
56  
57  
58  
59  
60

- 1  
2  
3 8. Murtaugh B, Ihm JM. Eccentric Training for the Treatment of Tendinopathies.  
4 Current Sports Medicine Reports. 2013;12(3):175-82.  
5
- 6 9. Young MA, Cook JL, Purdam CR, Kiss ZS, Alfredson H. Eccentric decline squat  
7 protocol offers superior results at 12 months compared with traditional eccentric protocol  
8 for patellar tendinopathy in volleyball players. British Journal of Sports Medicine.  
9 2005;39(2):102-5.  
10
- 11 10. Ortega-Castillo M, Medina-Porqueres I. Effectiveness of the eccentric exercise  
12 therapy in physically active adults with symptomatic shoulder impingement or lateral  
13 epicondylar tendinopathy: A systematic review. J Sci Med Sport. 2016;19(6):438-53.  
14
- 15 11. James SLJ, Ali K, Pocock C, Robertson C, Walter J, Bell J, et al. Ultrasound  
16 guided dry needling and autologous blood injection for patellar tendinosis. British Journal  
17 of Sports Medicine. 2007;41(8):518-21.  
18
- 19 12. Abat F DW, Gelber PE, Polidori F, Monllau JC, Sanchez-Ibañez JM.  
20 Effectiveness of the Intratissue Percutaneous Electrolysis (EPI®) technique and  
21 isoinertial eccentric exercise in the treatment of patellar tendinopathy at two years follow-  
22 up. Muscles Ligaments Tendons J. 2014;14(4):188-93.  
23
- 24 13. Valera Garrido F, Minaya Muñoz F, JM SI. Effectiveness of electrolysis  
25 percutaneous intratissular (EPI®) in chronic insertional patellar tendinopathy. Trauma  
26 Fund MAPFRE. 2010;21(4):227-36.  
27
- 28 14. Sánchez-Ibañez J, Alves R, Polidori F, Valera F, Minaya F, Valles-Martí S, et al.  
29 Effectiveness of ultrasound-guided percutaneous electrolysis intratendon (EPI) in the  
30 treatment of insertional patellar tendinopathy in soccer players. Br J Sports Med.  
31 2013;47(e2).  
32
- 33 15. Zwerver J, Verhagen E, Hartgens F, van den Akker-Scheek I, Diercks RL. The  
34 TOPGAME-study: effectiveness of extracorporeal shockwave therapy in jumping  
35 athletes with patellar tendinopathy. Design of a randomised controlled trial. BMC  
36 Musculoskeletal Disorders. 2010;11:6.  
37
- 38 16. Riggins CN, Chen M, Gordon JA, Schultz SM, Soslowky LJ, Khoury V.  
39 Ultrasound-Guided Dry Needling of the Healthy Rat Supraspinatus Tendon Elicits Early  
40 Healing Without Causing Permanent Damage. J Orthop Res. 2019;37(9):2035-42.  
41
- 42 17. Krey D, Borchers J, McCamey K. Tendon needling for treatment of tendinopathy:  
43 A systematic review. Physician and Sportsmedicine. 2015;43(1):80-6.  
44  
45  
46  
47  
48  
49  
50  
51  
52  
53  
54  
55  
56  
57  
58  
59  
60

18. Abat F, Valles S-L, Gelber P-E, Polidori F, Jorda A, Garcia-Herreros S, et al. An experimental study of muscular injury repair in a mouse model of notexin-induced lesion with EPI technique. *BMC sports science, medicine and rehabilitation*. 2015;7:7-.
19. Valera-Garrido, F, Minaya-Muñoz, F, Sánchez-Ibáñez, JM. Comparison of the acute inflammatory response and proliferation of dry needling and electrolysis percutaneous intratissue (epi) in healthy rat Achilles tendons. *Br J Sports Med*. 2013;47(9):e2-e2.
20. Alfredson H, Pietila T, Jonsson P, Lorentzon P. Heavy-load eccentric calf muscle training for the treatment of chronic Achilles tendinosis. *American Journal of Sports Medicine*. 1998;26(3):360-6.
21. Silbernagel KG, Crossley KM. A Proposed Return-to-Sport Program for Patients With Midportion Achilles Tendinopathy: Rationale and Implementation. *J Orthop Sports Phys Ther*. 2015;45(11):876-86.
22. Padrón-Benítez, A, Rojas-Mederos, S. A comparative study between low and high intensity percutaneous needle electrolysis in patients with patellar tendinopathy: a structural and functional analysis. *J Invasive Tech Phys Ther*. 2016;1(1):10-17.
23. Hernandez-Sanchez S, Hidalgo MD, Gomez A. Cross-cultural Adaptation of VISA-P Score for Patellar Tendinopathy in Spanish Population. *Journal of Orthopaedic & Sports Physical Therapy*. 2011;41(8):581-91.
24. Alonso J, Prieto L, Anto JM. The spanish version of the SF-36 health survey- A measure of clinical outcomes. *Medicina Clinica*. 1995;104(20):771-6.
25. Martinoli C. Musculoskeletal ultrasound: technical guidelines. *Insights into imaging*. 2010;1(3):99-141.
26. Rodriguez-Rosell D, Mora-Custodio R, Franco-Marquez F, Yanez-Garcia JM, Gonzalez-Badillo JJ. Traditional vs. Sport-Specific Vertical Jump Tests: Reliability, Validity, and Relationship With the Legs Strength and Sprint Performance in Adult and Teen Soccer and Basketball Players. *J Strength Cond Res*. 2017;31(1):196-206.
27. Helland C, Bojsen-Moller J, Raastad T, Seynnes OR, Moltubakk MM, Jakobsen V, et al. Mechanical properties of the patellar tendon in elite volleyball players with and without patellar tendinopathy. *Br J Sports Med*. 2013;47(13):862-8.
28. Gual G, Fort-Vanmeerhaeghe A, Romero-Rodriguez D, Tesch PA. Effects of In-Season Inertial Resistance Training With Eccentric Overload in a Sports Population at Risk for Patellar Tendinopathy. *J Strength Cond Res*. 2016;30(7):1834-42.

- 1  
2  
3 29. Scott A, LaPrade RF, Harmon KG, Filardo G, Kon E, Della Villa S, et al. Platelet-  
4 Rich Plasma for Patellar Tendinopathy: A Randomized Controlled Trial of Leukocyte-  
5 Rich PRP or Leukocyte-Poor PRP Versus Saline. *Am J Sports Med.*  
6 2019;363546519837954.  
7  
8  
9  
10 30. Figueroa D, Figueroa F, Calvo R. Patellar Tendinopathy: Diagnosis and  
11 Treatment. *J Am Acad Orthop Surg.* 2016;24(12):e184-e92.  
12  
13 31. Lian OB, Engebretsen L, Bahr R. Prevalence of jumper's knee among elite athletes  
14 from different sports - A cross-sectional study. *American Journal of Sports Medicine.*  
15 2005;33(4):561-7.  
16  
17 32. Visnes H, Bahr R. The evolution of eccentric training as treatment for patellar  
18 tendinopathy (jumper's knee): a critical review of exercise programmes. *British Journal*  
19 *of Sports Medicine.* 2007;41(4):217-23.  
20  
21 33. Abat F, Gelber PE, Polidori F, Monllau JC, Sanchez-Ibanez JM. Clinical results  
22 after ultrasound-guided intratissue percutaneous electrolysis (EPIA (R)) and eccentric  
23 exercise in the treatment of patellar tendinopathy. *Knee Surgery Sports Traumatology*  
24 *Arthroscopy.* 2015;23(4):1046-52.  
25  
26 34. Dragoo JL, Wasterlain AS, Braun HJ, Nead KT. Platelet-Rich Plasma as a  
27 Treatment for Patellar Tendinopathy A Double-Blind, Randomized Controlled Trial.  
28 *American Journal of Sports Medicine.* 2014;42(3):610-8.  
29  
30 35. Warden SJ, Kiss ZS, Malara FA, Ooi ABT, Cook JL, Crossley KM. Comparative  
31 accuracy of magnetic resonance imaging and ultrasonography in confirming clinically  
32 diagnosed patellar tendinopathy. *American Journal of Sports Medicine.* 2007;35(3):427-  
33 36.  
34  
35 36. Hernandez-Sanchez S, Hidalgo MD, Gomez A. Cross-cultural adaptation of  
36 VISA-P score for patellar tendinopathy in Spanish population. *J Orthop Sports Phys Ther.*  
37 2011;41(8):581-91.  
38  
39 37. Andriolo L, Altamura SA, Reale D, Candrian C, Zaffagnini S, Filardo G.  
40 Nonsurgical Treatments of Patellar Tendinopathy: Multiple Injections of Platelet-Rich  
41 Plasma Are a Suitable Option: A Systematic Review and Meta-analysis. *Am J Sports*  
42 *Med.* 2019;47(4):1001-18.  
43  
44 38. de Vries A, Zwerver J, Diercks R, Tak I, van Berkel S, van Cingel R, et al. Effect  
45 of patellar strap and sports tape on pain in patellar tendinopathy: A randomized controlled  
46 trial. *Scand J Med Sci Sports.* 2016;26(10):1217-24.  
47  
48  
49  
50  
51  
52  
53  
54  
55  
56  
57  
58  
59  
60

1  
2  
3 39. Markovic G, Dizdar D, Jukic I, Cardinale M. Reliability and factorial validity of  
4 squat and countermovement jump tests. J Strength Cond Res. 2004;18(3):551-5.  
5  
6  
7  
8  
9

#### 10 **AUTHOR'S CONTRIBUTIONS**

11 MPL, EMG and PH conceived of the idea, and developed the intervention. MPL and PH  
12 wrote the article. MPL, MO, RMG, AVB, ZA, YH and PH developed the design of the  
13 trial. MO were involved in development of the statistical analysis of the trial and  
14 contributed to the content of the article. AVB contributed to the design and writing of the  
15 jump test protocol. All authors have read and approved the final manuscript.  
16  
17  
18  
19  
20  
21  
22  
23  
24  
25  
26  
27

#### 28 **FUNDING STATEMENT**

29 This research received no specific grant from any funding agency in the public,  
30 commercial or not-for-profit sectors.  
31  
32  
33  
34  
35

#### 36 **COMPETING INTEREST STATEMENT**

37 The authors declare that they have no competing interests.  
38  
39  
40  
41  
42  
43  
44  
45  
46  
47  
48  
49  
50  
51  
52  
53  
54  
55  
56  
57  
58  
59  
60

## TABLES

Table 1. Jump test's protocol.

| <b>JUMP TEST PROTOCOL</b>                                                                                                                                                                                                                                    |                                                                              |
|--------------------------------------------------------------------------------------------------------------------------------------------------------------------------------------------------------------------------------------------------------------|------------------------------------------------------------------------------|
| 5-minute warm-up consisting of steady jogging on a treadmill                                                                                                                                                                                                 |                                                                              |
| Dynamic Stretches lasting 5 minutes, as instructed by the physical therapist                                                                                                                                                                                 | Psoas<br>Quadriceps<br>Gluteus maximus<br>Gastrocnemius<br>Hamstring muscles |
| Three jump tests are performed<br>- 3 jumps off the ground for 3 times for the patient to become familiar with the tests<br>- The subject is placed on the platform and asked to perform each test 3 times, with 60 seconds rest between the different tests | Abalakov test<br>Countermovement jump test<br>Squat jump                     |
| The highest jump is selected for the study                                                                                                                                                                                                                   |                                                                              |

## FIGURES

Figure 1. Flow diagram. Randomized controlled trial design.

G-PNE: Percutaneous Needle Electrolysis Group. G-DN: Dry Needle Group.

Figure 2. Schedule for the enrolment and intervention.

Schedule for enrolment and intervention per cluster. -t1: baseline; t1-t2: intervention period; t2: 8 weeks after baseline; t3: 10 weeks after baseline; t4: 3 months after baseline. G-PNE: Percutaneous Needle Electrolysis Group; G-DN: Dry Needle Group; US: ultrasound.

1  
2  
3  
4  
5  
6  
7  
8  
9  
10  
11  
12  
13  
14  
15  
16  
17  
18  
19  
20  
21  
22  
23  
24  
25  
26  
27  
28  
29  
30  
31  
32  
33  
34  
35  
36  
37  
38  
39  
40  
41  
42  
43  
44  
45  
46  
47  
48  
49  
50  
51  
52  
53  
54  
55  
56  
57  
58  
59  
60

Figure 1. Flow diagram. Randomized controlled trial design.



210x297mm (300 x 300 DPI)



Figure 2. Schedule for enrolment and intervention.

|                                         | Enrolment       | Allocation | Close-out      |                |                |                |
|-----------------------------------------|-----------------|------------|----------------|----------------|----------------|----------------|
| TIMEPOINT**                             | -t <sub>1</sub> | 0          | t <sub>1</sub> | t <sub>2</sub> | t <sub>3</sub> | t <sub>4</sub> |
| <b>ENROLMENT:</b>                       |                 |            |                |                |                |                |
| Eligibility screen                      | X               |            |                |                |                |                |
| Informed consent                        | X               |            |                |                |                |                |
| Allocation                              |                 | X          |                |                |                |                |
| <b>INTERVENTIONS:</b>                   |                 |            |                |                |                |                |
| <i>Control group</i>                    |                 |            | ↔              |                |                |                |
| <i>G-PNE</i>                            |                 |            | ↔              |                |                |                |
| <i>G-DN</i>                             |                 |            | ↔              |                |                |                |
| <b>ASSESSMENTS:</b>                     |                 |            |                |                |                |                |
| <i>Baseline demographic information</i> | X               |            |                |                |                |                |
| <i>VISA-P</i>                           | X               |            | X              |                | X              | X              |
| <i>VAS</i>                              |                 |            | X              |                | X              | X              |
| <i>SF-36</i>                            |                 |            | X              |                | X              | X              |
| <i>Tendon structure US</i>              |                 |            | X              |                | X              | X              |
| <i>Jump test</i>                        |                 |            | X              |                | X              | X              |

215x279mm (300 x 300 DPI)

## DOCUMENTO DE INFORMACIÓN AL PACIENTE

### Fecha:

**Título del proyecto:** “ESTUDIO COMPARATIVO ENTRE TÉCNICAS DE PUNCIÓN PARA EL TRATAMIENTO DE LA TENDINOPATÍA CRÓNICA DEL TENDÓN ROTULIANO”

### Investigador principal:

Doña: M<sup>a</sup> Pilar López Royo

Este estudio se basa en el estudio comparativo de tratamientos que utilizan distintas técnicas de fisioterapia invasiva junto con un programa de ejercicio excéntrico para el tratamiento de la tendinopatía rotuliana. Por medio del tratamiento se produce una disminución del dolor asociado a esta patología y un aumento de la fuerza de la pierna, lo que a su vez hace que mejore la funcionalidad en las actividades de la vida diaria y mejore la calidad de vida.

### PROCESO DE SELECCIÓN DE PACIENTES

#### Criterios de inclusión:

- Edad comprendida entre 18 y 40 años.
- Practicar cualquier deporte de forma habitual.
- Pacientes con diagnóstico médico de tendinopatía rotuliana crónica con un mínimo de 3 meses de evolución y con sintomatología.
- Dolor a la palpación del tendón en el polo inferior de la rótula y durante el entrenamiento o competición.
- Puntuación del cuestionario VISA-P menor de 80 (el resultado obtenido de rellenar el cuestionario tiene que ser menor de 80 puntos de los 100 posibles para poder participar en el estudio).

#### Criterios de exclusión:

- Paciente operado de la rodilla afectada en los últimos 6 meses.
- Infiltraciones en la rodilla afectada en los últimos 3 meses.
- Paciente que ha recibido tratamiento farmacológico o fisioterápico en las últimas 48 horas o durante el estudio.
- Patología con menos de 3 meses de evolución.
- Presentar tendinopatía rotuliana bilateral.
- Puntuación del cuestionario VISA-p mayor o igual de 80 (el resultado obtenido de rellenar el cuestionario no puede ser igual o superar los 80 puntos de los 100 posibles, sino no podrá participar en el estudio).
- Imposibilidad para aplicar alguna de las técnicas de tratamiento o valoración por

1  
2                    contraindicación absoluta o relativa.  
3  
4  
5  
6

## 7   **PROCEDIMIENTO**

8   El tratamiento consiste en realizar un protocolo de ejercicios excéntricos de cuádriceps que  
9   realizará en casa de forma diaria, y que serán revisados con el fisioterapeuta para valorar su  
10   correcta realización. Se complementará el tratamiento con la aplicación de una técnica de punción  
11   según el protocolo de tratamiento propuesto de forma totalmente **aleatorizada** y según los  
12   criterios diagnósticos específicos de la misma, siguiendo las indicaciones, criterios de aplicación y  
13   criterios diagnósticos.  
14

15   Son técnicas de punción cuyo objetivo es producir una respuesta inflamatoria aguda que active los  
16   mecanismos fisiológicos de regeneración del tejido y mejorar el dolor y la funcionalidad en la  
17   articulación de la rodilla, se realiza con agujas de punción seca, similares a las agujas de  
18   acupuntura y sin infiltrar ningún tipo de sustancia dentro del organismo.  
19  
20  
21  
22  
23

24  
25   Los registros serán realizados en el Espacio de Valoración Funcional de la Universidad San Jorge,  
26   en la Facultad de Ciencias de la Salud, Edificio III. Se pondrá a su disposición la posibilidad de  
27   utilizar el autobús que utiliza el personal y alumnado de la universidad (en el horario que éste esté  
28   disponible). Las fechas y horarios serán convenidas con cada participante en función de su  
29   disponibilidad y la de los investigadores, buscando la conformidad de todos. La duración  
30   aproximada del estudio para cada paciente será de 30 minutos, aunque este horario podrá variar  
31   en función de los acontecimientos.  
32  
33  
34  
35  
36

37  
38   Será recibido por los miembros del equipo de investigación y una vez allí, se le realizará un primer  
39   análisis fisioterápico, rellenará una encuesta, una escala analógica visual (EVA) del dolor y el  
40   cuestionario Visa-p en el que se valorará la funcionalidad de la rodilla.  
41  
42

43   Tras éste primer registro se le colocará un marcador pasivo en el pantalón. Se le pedirá que  
44   realice el siguiente protocolo:  
45

- 46   - Calentamiento de 5 minutos en cinta a ritmo constante.
- 47   - Estiramientos dinámicos de psoas, cuádriceps, glúteo, gastrocnemios, isquiotibiales durante 5
- 48   minutos instruidos por el fisioterapeuta.
- 49   - Realización de los 3 saltos fuera de la plataforma durante 3 veces para que se familiarice con los
- 50   tests.
- 51   - En la plataforma de fuerzas realizará 3 test de salto: el test de Abalakov (ABK), el test de salto
- 52   con contramovimiento (CMJ) y el squatjump (SJ).
- 53
- 54   Se colocará en la plataforma y realizará 3 saltos de cada uno de los test con una separación entre
- 55   ellos de 60 segundos.
- 56
- 57
- 58
- 59
- 60

Se valora el tendón por ecografía, y se recogen datos por medio de personal adiestrado y se envía

1 a personal especialista en radiodiagnóstico.

2  
3 Tras los registros de los saltos se dará por finalizada la valoración.

4  
5  
6 Tras la 1ª valoración, se realizará una división en tres grupos de los pacientes de forma  
7 aleatorizada.

8  
9 Se le realizará el protocolo de tratamiento de fisioterapia invasiva que le haya correspondido.  
10 Realizará una sesión del tratamiento cada 14 días, y se realizará la 2ª valoración 1 semana más  
11 tarde de la 4ª sesión de punción para valorar los cambios que se hayan producido tras el  
12 tratamiento, repitiéndose de nuevo el proceso de recogida de datos realizado al inicio del estudio.  
13 Se realizará un seguimiento a los tres meses de la valoración post-tratamiento para valorar la  
14 eficacia de la técnica a largo plazo del tratamiento.

15  
16 El procedimiento se realizará guiado ecográficamente para asegurar la especificidad de aplicación  
17 sobre la zona relevante de tratamiento y garantizar la seguridad de la técnica. Se hace posterior a  
18 esta intervención una serie de ejercicios excéntricos de cuádriceps. El tratamiento se realizará  
19 durante 4 sesiones (a razón de una sesión cada 14 días).

## 26 **RIESGOS**

27 La aplicación de las técnicas de punción utilizadas no han demostrado tener ningún efecto  
28 secundario hasta la fecha, aunque el paciente puede experimentar dolor durante y tras la punción,  
29 generalmente de uno o dos días de duración.

## 34 **RESPONSABILIDADES DEL PARTICIPANTE**

35 La información que usted posea sobre su estado de salud o sobre sensaciones previas  
36 anormales al realizarle una punción, puede afectar la seguridad o el valor de estas pruebas. La  
37 rápida comunicación por su parte de las sensaciones que experimenta al realizar esta prueba es  
38 también de gran importancia. Usted es responsable de revelar esa información al personal de la  
39 prueba cuando se le pregunte.

## 45 **PREGUNTAS**

46 Le animamos a que haga cualquier pregunta sobre los procedimientos seguidos o sus resultados  
47 en la prueba. Si tiene alguna preocupación o pregunta, por favor pídasenos más información, para  
48 ello le dejamos un correo electrónico [mapilr86@hotmail.com](mailto:mapilr86@hotmail.com) y un número de teléfono móvil:  
49 616102365.

## 54 **LIBERTAD PARA DAR EL CONSENTIMIENTO**

55 Usted participa en el estudio de manera voluntaria, pudiendo abandonarlo en el momento  
56 que considere oportuno, sin que esto conlleve ninguna repercusión negativa para usted.

57 Los datos obtenidos en el estudio serán confidenciales y únicamente se hará uso de ellos

1  
2 para el cumplimiento de los objetivos planteados en la investigación. No se cederán estos datos a  
3 terceros sin el consentimiento expreso de los sujetos participantes a quienes pertenezcan los  
4 datos.  
5

6 En esta investigación se garantizará el anonimato de los sujetos que aportan los datos,  
7 estableciendo un código disociado para identificarlos que sólo será conocido por los responsables  
8 de la realización del trabajo de campo.  
9  
10  
11  
12  
13  
14  
15  
16

17 Fdo: M<sup>a</sup> Pilar López Royo  
18  
19  
20  
21  
22  
23  
24  
25  
26  
27  
28  
29  
30  
31  
32  
33  
34  
35  
36  
37  
38  
39  
40  
41  
42  
43  
44  
45  
46  
47  
48  
49  
50  
51  
52  
53  
54  
55  
56  
57  
58  
59  
60

## MODELO DE CONSENTIMIENTO INFORMADO

Título del PROYECTO: “ESTUDIO COMPARATIVO ENTRE TÉCNICAS DE PUNCIÓN PARA EL TRATAMIENTO DE LA TENDINOPATÍA CRÓNICA DEL TENDÓN ROTULIANO”

Doña: M<sup>a</sup> Pilar López Royo ([mapilr86@hotmail.com](mailto:mapilr86@hotmail.com))  
Departamento de Fisiatría y Enfermería  
UNIVERSIDAD DE ZARAGOZA

Yo, ..... (nombre y apellidos del participante)

He recibido suficiente información en relación con el proyecto, he leído la hoja de información que se me ha entregado y he podido hacer preguntas sobre el proyecto, recibiendo respuestas satisfactorias.

Entiendo que la participación es voluntaria y que puedo abandonar el proyecto:

- . Cuando lo desee
- . Sin tener que dar explicaciones
- . Sin que esto repercuta en mis cuidados médicos

He sido claramente informado de forma clara y precisa del tratado que recibirán mis datos personales que se contienen en este proyecto, sabiendo que los datos serán tratados y custodiados bajo mi intimidad y a la vigente normativa de la protección de datos, y que sobre estos datos me asisten los derechos de rectificación, acceso y oposición comunicándolo al investigador principal que figura en este consentimiento.

Declaro que presto libremente mi conformidad para participar en el estudio.

Deseo ser informado sobre los resultados del estudio:      sí      no      (marque lo que proceda)

Así pues, acepto que las muestras derivadas de este proyecto puedan ser utilizadas en futuras investigaciones siempre y cuando están relacionadas con ésta.

Por lo tanto, doy mi conformidad para que mis datos clínicos sean revisados por personal ajeno al centro, para los fines del estudio, y soy consciente de que este consentimiento es

1  
2 revocable.  
3  
4  
5  
6

7 Firma del participante:

8 \_\_\_\_\_  
9

10 Fecha:

11 \_\_\_\_\_  
12  
13  
14  
15  
16

17 He explicado la naturaleza y el propósito del proyecto al paciente mencionado  
18  
19

20  
21 Firma del Investigador:

22 \_\_\_\_\_  
23

24 Fecha:

25 \_\_\_\_\_  
26  
27  
28  
29

30  
31 Consentimiento informado estudio \_\_\_\_\_  
32

33 Versión \_\_\_\_\_, fecha \_\_\_\_\_  
34  
35  
36  
37  
38  
39  
40  
41  
42  
43  
44  
45  
46  
47  
48  
49  
50  
51  
52  
53  
54  
55  
56  
57  
58  
59  
60

1  
2  
3 **Appendix 2. Checklist SPIRIT**  
4

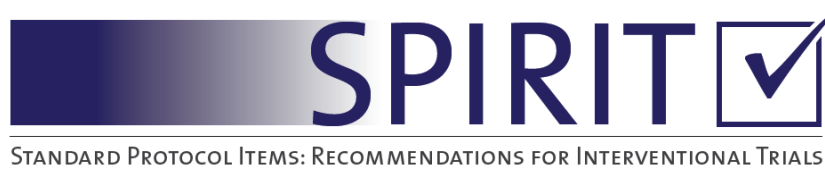

26  
27  
28  
29  
30  
31  
32  
33  
34  
35  
36  
37  
38  
39  
40  
41  
42  
43  
44  
45  
46  
47  
48  
49  
50  
51  
52  
53

6 SPIRIT 2013 Checklist: Recommended items to address in a clinical trial protocol and  
7 related documents\*

| Section/item                      | Item No | Description                                                                                                                                                                                                                                                                              | Addressed on page number |
|-----------------------------------|---------|------------------------------------------------------------------------------------------------------------------------------------------------------------------------------------------------------------------------------------------------------------------------------------------|--------------------------|
| <b>Administrative information</b> |         |                                                                                                                                                                                                                                                                                          |                          |
| Title                             | 1       | Descriptive title identifying the study design, population, interventions, and, if applicable, trial acronym                                                                                                                                                                             | 1                        |
| Trial registration                | 2a      | Trial identifier and registry name. If not yet registered, name of intended registry                                                                                                                                                                                                     | 1-3                      |
|                                   | 2b      | All items from the World Health Organization Trial Registration Data Set                                                                                                                                                                                                                 | 2-3                      |
| Protocol version                  | 3       | Date and version identifier                                                                                                                                                                                                                                                              | N/A                      |
| Funding                           | 4       | Sources and types of financial, material, and other support                                                                                                                                                                                                                              | 22                       |
| Roles and responsibilities        | 5a      | Names, affiliations, and roles of protocol contributors                                                                                                                                                                                                                                  | 22                       |
|                                   | 5b      | Name and contact information for the trial sponsor                                                                                                                                                                                                                                       | 22                       |
|                                   | 5c      | Role of study sponsor and funders, if any, in study design; collection, management, analysis, and interpretation of data; writing of the report; and the decision to submit the report for publication, including whether they will have ultimate authority over any of these activities | N/A                      |
|                                   | 5d      | Composition, roles, and responsibilities of the coordinating centre, steering committee, endpoint adjudication committee, data management team, and other individuals or groups overseeing the trial, if applicable (see Item 21a for data monitoring committee)                         | N/A                      |
| <b>Introduction</b>               |         |                                                                                                                                                                                                                                                                                          |                          |
| Background and rationale          | 6a      | Description of research question and justification for undertaking the trial, including summary of relevant studies (published and unpublished) examining benefits and harms for each intervention                                                                                       | 3-5                      |
|                                   | 6b      | Explanation for choice of comparators                                                                                                                                                                                                                                                    | 3-5                      |
| Objectives                        | 7       | Specific objectives or hypotheses                                                                                                                                                                                                                                                        | 5-6                      |



|                                                                     |     |                                                                                                                                                                                                                                                                                                                                                                                |       |
|---------------------------------------------------------------------|-----|--------------------------------------------------------------------------------------------------------------------------------------------------------------------------------------------------------------------------------------------------------------------------------------------------------------------------------------------------------------------------------|-------|
| Trial design                                                        | 8   | Description of trial design including type of trial (eg, parallel group, crossover, factorial, single group), allocation ratio, and framework (eg, superiority, equivalence, noninferiority, exploratory)                                                                                                                                                                      | 6     |
| <b>Methods: Participants, interventions, and outcomes</b>           |     |                                                                                                                                                                                                                                                                                                                                                                                |       |
| Study setting                                                       | 9   | Description of study settings (eg, community clinic, academic hospital) and list of countries where data will be collected. Reference to where list of study sites can be obtained                                                                                                                                                                                             | 6     |
| Eligibility criteria                                                | 10  | Inclusion and exclusion criteria for participants. If applicable, eligibility criteria for study centres and individuals who will perform the interventions (eg, surgeons, psychotherapists)                                                                                                                                                                                   | 7     |
| Interventions                                                       | 11a | Interventions for each group with sufficient detail to allow replication, including how and when they will be administered                                                                                                                                                                                                                                                     | 7-9   |
|                                                                     | 11b | Criteria for discontinuing or modifying allocated interventions for a given trial participant (eg, drug dose change in response to harms, participant request, or improving/worsening disease)                                                                                                                                                                                 | N/A   |
|                                                                     | 11c | Strategies to improve adherence to intervention protocols, and any procedures for monitoring adherence (eg, drug tablet return, laboratory tests)                                                                                                                                                                                                                              | 8     |
|                                                                     | 11d | Relevant concomitant care and interventions that are permitted or prohibited during the trial                                                                                                                                                                                                                                                                                  | 8     |
| Outcomes                                                            | 12  | Primary, secondary, and other outcomes, including the specific measurement variable (eg, systolic blood pressure), analysis metric (eg, change from baseline, final value, time to event), method of aggregation (eg, median, proportion), and time point for each outcome. Explanation of the clinical relevance of chosen efficacy and harm outcomes is strongly recommended | 9-11  |
| Participant timeline                                                | 13  | Time schedule of enrolment, interventions (including any run-ins and washouts), assessments, and visits for participants. A schematic diagram is highly recommended (see Figure)                                                                                                                                                                                               | 11    |
| Sample size                                                         | 14  | Estimated number of participants needed to achieve study objectives and how it was determined, including clinical and statistical assumptions supporting any sample size calculations                                                                                                                                                                                          | 11-12 |
| Recruitment                                                         | 15  | Strategies for achieving adequate participant enrolment to reach target sample size                                                                                                                                                                                                                                                                                            | 12    |
| <b>Methods: Assignment of interventions (for controlled trials)</b> |     |                                                                                                                                                                                                                                                                                                                                                                                |       |
| Allocation:                                                         |     |                                                                                                                                                                                                                                                                                                                                                                                |       |
| Sequence generation                                                 | 16a | Method of generating the allocation sequence (eg, computer-generated random numbers), and list of any factors for stratification. To reduce predictability of a random sequence, details of any planned restriction (eg, blocking) should be provided in a separate document that is unavailable to those who enrol participants or assign interventions                       | 12-13 |
| Allocation concealment mechanism                                    | 16b | Mechanism of implementing the allocation sequence (eg, central telephone; sequentially numbered, opaque, sealed envelopes), describing any steps to conceal the sequence until interventions are assigned                                                                                                                                                                      | 12-13 |

|    |                                                           |     |                                                                                                                           |       |
|----|-----------------------------------------------------------|-----|---------------------------------------------------------------------------------------------------------------------------|-------|
| 1  |                                                           |     |                                                                                                                           |       |
| 2  |                                                           |     |                                                                                                                           |       |
| 3  |                                                           |     |                                                                                                                           |       |
| 4  | Implemen                                                  | 16c | Who will generate the allocation sequence, who will enrol participants, and who will assign participants to interventions | 13    |
| 5  | tation                                                    |     |                                                                                                                           |       |
| 6  | Blinding                                                  | 17a | Who will be blinded after assignment to interventions (eg, trial                                                          | 13    |
| 7  | (masking)                                                 |     | participants, care providers, outcome assessors, data analysts), and                                                      |       |
| 8  |                                                           |     | how                                                                                                                       |       |
| 9  |                                                           | 17b | If blinded, circumstances under which unblinding is permissible, and                                                      | 13    |
| 10 |                                                           |     | procedure for revealing a participant's allocated intervention during the                                                 |       |
| 11 |                                                           |     | trial                                                                                                                     |       |
| 12 |                                                           |     |                                                                                                                           |       |
| 13 | <b>Methods: Data collection, management, and analysis</b> |     |                                                                                                                           |       |
| 14 |                                                           |     |                                                                                                                           |       |
| 15 | Data                                                      | 18a | Plans for assessment and collection of outcome, baseline, and other                                                       | 13-14 |
| 16 | collection                                                |     | trial data, including any related processes to promote data quality (eg,                                                  |       |
| 17 | methods                                                   |     | duplicate measurements, training of assessors) and a description of                                                       |       |
| 18 |                                                           |     | study instruments (eg, questionnaires, laboratory tests) along with their                                                 |       |
| 19 |                                                           |     | reliability and validity, if known. Reference to where data collection                                                    |       |
| 20 |                                                           |     | forms can be found, if not in the protocol                                                                                |       |
| 21 |                                                           | 18b | Plans to promote participant retention and complete follow-up,                                                            | N/A   |
| 22 |                                                           |     | including list of any outcome data to be collected for participants who                                                   |       |
| 23 |                                                           |     | discontinue or deviate from intervention protocols                                                                        |       |
| 24 |                                                           |     |                                                                                                                           |       |
| 25 | Data                                                      | 19  | Plans for data entry, coding, security, and storage, including any                                                        | 14    |
| 26 | management                                                |     | related processes to promote data quality (eg, double data entry; range                                                   |       |
| 27 |                                                           |     | checks for data values). Reference to where details of data                                                               |       |
| 28 |                                                           |     | management procedures can be found, if not in the protocol                                                                |       |
| 29 |                                                           |     |                                                                                                                           |       |
| 30 | Statistical                                               | 20a | Statistical methods for analysing primary and secondary outcomes.                                                         | 14    |
| 31 | methods                                                   |     | Reference to where other details of the statistical analysis plan can be                                                  |       |
| 32 |                                                           |     | found, if not in the protocol                                                                                             |       |
| 33 |                                                           | 20b | Methods for any additional analyses (eg, subgroup and adjusted                                                            | 14    |
| 34 |                                                           |     | analyses)                                                                                                                 |       |
| 35 |                                                           |     |                                                                                                                           |       |
| 36 |                                                           | 20c | Definition of analysis population relating to protocol non-adherence (eg,                                                 | 14    |
| 37 |                                                           |     | as randomised analysis), and any statistical methods to handle missing                                                    |       |
| 38 |                                                           |     | data (eg, multiple imputation)                                                                                            |       |
| 39 |                                                           |     |                                                                                                                           |       |
| 40 | <b>Methods: Monitoring</b>                                |     |                                                                                                                           |       |
| 41 |                                                           |     |                                                                                                                           |       |
| 42 | Data                                                      | 21a | Composition of data monitoring committee (DMC); summary of its role                                                       | -     |
| 43 | monitoring                                                |     | and reporting structure; statement of whether it is independent from the                                                  |       |
| 44 |                                                           |     | sponsor and competing interests; and reference to where further                                                           |       |
| 45 |                                                           |     | details about its charter can be found, if not in the protocol.                                                           |       |
| 46 |                                                           |     | Alternatively, an explanation of why a DMC is not needed                                                                  |       |
| 47 |                                                           | 21b | Description of any interim analyses and stopping guidelines, including                                                    | -     |
| 48 |                                                           |     | who will have access to these interim results and make the final                                                          |       |
| 49 |                                                           |     | decision to terminate the trial                                                                                           |       |
| 50 |                                                           |     |                                                                                                                           |       |
| 51 | Harms                                                     | 22  | Plans for collecting, assessing, reporting, and managing solicited and                                                    | -     |
| 52 |                                                           |     | spontaneously reported adverse events and other unintended effects of                                                     |       |
| 53 |                                                           |     | trial interventions or trial conduct                                                                                      |       |
| 54 |                                                           |     |                                                                                                                           |       |
| 55 | Auditing                                                  | 23  | Frequency and procedures for auditing trial conduct, if any, and                                                          | N/A   |
| 56 |                                                           |     | whether the process will be independent from investigators and the                                                        |       |
| 57 |                                                           |     | sponsor                                                                                                                   |       |
| 58 | <b>Ethics and dissemination</b>                           |     |                                                                                                                           |       |
| 59 |                                                           |     |                                                                                                                           |       |
| 60 |                                                           |     |                                                                                                                           |       |

|                               |     |                                                                                                                                                                                                                                                                                     |     |
|-------------------------------|-----|-------------------------------------------------------------------------------------------------------------------------------------------------------------------------------------------------------------------------------------------------------------------------------------|-----|
| Research ethics approval      | 24  | Plans for seeking research ethics committee/institutional review board (REC/IRB) approval                                                                                                                                                                                           | 15  |
| Protocol amendments           | 25  | Plans for communicating important protocol modifications (eg, changes to eligibility criteria, outcomes, analyses) to relevant parties (eg, investigators, REC/IRBs, trial participants, trial registries, journals, regulators)                                                    | 15  |
| Consent or assent             | 26a | Who will obtain informed consent or assent from potential trial participants or authorised surrogates, and how (see Item 32)                                                                                                                                                        | 15  |
|                               | 26b | Additional consent provisions for collection and use of participant data and biological specimens in ancillary studies, if applicable                                                                                                                                               |     |
| Confidentiality               | 27  | How personal information about potential and enrolled participants will be collected, shared, and maintained in order to protect confidentiality before, during, and after the trial                                                                                                | 15  |
| Declaration of interests      | 28  | Financial and other competing interests for principal investigators for the overall trial and each study site                                                                                                                                                                       |     |
| Access to data                | 29  | Statement of who will have access to the final trial dataset, and disclosure of contractual agreements that limit such access for investigators                                                                                                                                     | 15  |
| Ancillary and post-trial care | 30  | Provisions, if any, for ancillary and post-trial care, and for compensation to those who suffer harm from trial participation                                                                                                                                                       | -   |
| Dissemination policy          | 31a | Plans for investigators and sponsor to communicate trial results to participants, healthcare professionals, the public, and other relevant groups (eg, via publication, reporting in results databases, or other data sharing arrangements), including any publication restrictions | -   |
|                               | 31b | Authorship eligibility guidelines and any intended use of professional writers                                                                                                                                                                                                      |     |
|                               | 31c | Plans, if any, for granting public access to the full protocol, participant-level dataset, and statistical code                                                                                                                                                                     |     |
| <b>Appendices</b>             |     |                                                                                                                                                                                                                                                                                     |     |
| Informed consent materials    | 32  | Model consent form and other related documentation given to participants and authorised surrogates                                                                                                                                                                                  | N/A |
| Biological specimens          | 33  | Plans for collection, laboratory evaluation, and storage of biological specimens for genetic or molecular analysis in the current trial and for future use in ancillary studies, if applicable                                                                                      | N/A |

8

# BMJ Open

## A comparative study of treatment interventions for patellar tendinopathy: a protocol for a randomized controlled trial

|                                 |                                                                                                                                                                                                                                                                                                                                                                                                                                                                                                                                                                                                                                                                                                                                                                                                                                                |
|---------------------------------|------------------------------------------------------------------------------------------------------------------------------------------------------------------------------------------------------------------------------------------------------------------------------------------------------------------------------------------------------------------------------------------------------------------------------------------------------------------------------------------------------------------------------------------------------------------------------------------------------------------------------------------------------------------------------------------------------------------------------------------------------------------------------------------------------------------------------------------------|
| Journal:                        | <i>BMJ Open</i>                                                                                                                                                                                                                                                                                                                                                                                                                                                                                                                                                                                                                                                                                                                                                                                                                                |
| Manuscript ID                   | bmjopen-2019-034304.R4                                                                                                                                                                                                                                                                                                                                                                                                                                                                                                                                                                                                                                                                                                                                                                                                                         |
| Article Type:                   | Protocol                                                                                                                                                                                                                                                                                                                                                                                                                                                                                                                                                                                                                                                                                                                                                                                                                                       |
| Date Submitted by the Author:   | 21-Jan-2020                                                                                                                                                                                                                                                                                                                                                                                                                                                                                                                                                                                                                                                                                                                                                                                                                                    |
| Complete List of Authors:       | Lopez-Royo, Maria Pilar; Universidad San Jorge Facultad de Ciencias de la Salud; Universidad de Zaragoza, Facultad de Ciencias de la Salud y del Deporte<br>Gómez-Trullén, Eva Maria; Universidad de Zaragoza, Facultad de Ciencias de la Salud y del Deporte<br>Ortiz-Lucas, Maria; Universidad San Jorge Facultad de Ciencias de la Salud<br>Galán-Díaz, Rita Maria; Universidad San Jorge Facultad de Ciencias de la Salud<br>Bataller-Cervero, Ana Vanessa; Universidad San Jorge Facultad de Ciencias de la Salud<br>Al-Boloushi, Zaid; Universidad de Zaragoza Facultad de Ciencias, Facultad de Ciencias de la Salud y del Deporte; Kuwait Ministry of Health<br>Hamam-Alcober, Yasmina; Universidad San Jorge Facultad de Ciencias de la Salud, Fisioterapia<br>Herrero, Pablo; Universidad San Jorge Facultad de Ciencias de la Salud |
| <b>Primary Subject Heading</b>: | Rehabilitation medicine                                                                                                                                                                                                                                                                                                                                                                                                                                                                                                                                                                                                                                                                                                                                                                                                                        |
| Secondary Subject Heading:      | Sports and exercise medicine, Pathology                                                                                                                                                                                                                                                                                                                                                                                                                                                                                                                                                                                                                                                                                                                                                                                                        |
| Keywords:                       | Eccentric Exercise, Tendinopathy, Percutaneous Needle Electrolysis, Dry Needling                                                                                                                                                                                                                                                                                                                                                                                                                                                                                                                                                                                                                                                                                                                                                               |
|                                 |                                                                                                                                                                                                                                                                                                                                                                                                                                                                                                                                                                                                                                                                                                                                                                                                                                                |

SCHOLARONE™  
Manuscripts



I, the Submitting Author has the right to grant and does grant on behalf of all authors of the Work (as defined in the below author licence), an exclusive licence and/or a non-exclusive licence for contributions from authors who are: i) UK Crown employees; ii) where BMJ has agreed a CC-BY licence shall apply, and/or iii) in accordance with the terms applicable for US Federal Government officers or employees acting as part of their official duties; on a worldwide, perpetual, irrevocable, royalty-free basis to BMJ Publishing Group Ltd ("BMJ") its licensees and where the relevant Journal is co-owned by BMJ to the co-owners of the Journal, to publish the Work in this journal and any other BMJ products and to exploit all rights, as set out in our [licence](#).

The Submitting Author accepts and understands that any supply made under these terms is made by BMJ to the Submitting Author unless you are acting as an employee on behalf of your employer or a postgraduate student of an affiliated institution which is paying any applicable article publishing charge ("APC") for Open Access articles. Where the Submitting Author wishes to make the Work available on an Open Access basis (and intends to pay the relevant APC), the terms of reuse of such Open Access shall be governed by a Creative Commons licence – details of these licences and which [Creative Commons](#) licence will apply to this Work are set out in our licence referred to above.

Other than as permitted in any relevant BMJ Author's Self Archiving Policies, I confirm this Work has not been accepted for publication elsewhere, is not being considered for publication elsewhere and does not duplicate material already published. I confirm all authors consent to publication of this Work and authorise the granting of this licence.

1  
2  
3 A comparative study of treatment interventions for patellar tendinopathy: a protocol for  
4  
5 a randomized controlled trial  
6  
7

8 López-Royo MP<sup>a,b</sup>, Gómez-Trullén EM<sup>b</sup>, Ortiz-Lucas M<sup>a</sup>, Galán-Díaz RM<sup>a</sup>, Bataller-Cervero  
9  
10 AV<sup>a</sup>, Al-Boloushi Z<sup>b,c</sup>, Hamam-Alcober Y<sup>a</sup>, Herrero P<sup>a\*</sup>  
11  
12

13 **AFFILIATIONS**  
14

- 15  
16 **A.** iPhysio Research Group. Universidad San Jorge. Campus Universitario, Autov.  
17  
18 A23 km 299, 50830. Villanueva de Gállego, Zaragoza, Spain.  
19  
20 **B.** Universidad de Zaragoza. Facultad de Ciencias de la Salud y del Deporte. Dpto.  
21  
22 de Fisiatría y Enfermería. C/ Domingo Miral s/n, 50009 - Zaragoza, Spain.  
23  
24 **C.** Ministry of Health, State of Kuwait. Jamal Abdunnasser Street, Al Solaibeykhat  
25  
26 Area 5. Kuwait City. Safat 13001.  
27  
28  
29  
30  
31  
32

33 **\*CORRESPONDENCE TO:**  
34

35  
36 Dr. Pablo Herrero. iPhysio Research Group. Universidad San Jorge. Campus  
37  
38 Universitario, Autov A23, Km 299, 50830 Villanueva de Gállego, Zaragoza, Spain.  
39  
40 Tel.: (+34) 976 060 100 Fax: 976 077 581. Email: pherrero@usj.es  
41  
42

43 **ADDITIONAL AUTHOR INFORMATION**  
44

45  
46 Maria Pilar López Royo. Emails: mplopez@usj.es  
47  
48

49  
50 Eva María Gómez Trullén. Email: evagomez@unizar.es  
51

52  
53 María Ortiz Lucas. Email: mariaortizlucas@gmail.com  
54

55  
56 Rita María Galán Díaz. Email: rmgalan@usj.es  
57

58  
59 Ana Vanessa Bataller-Cervero. Email: avbataller@usj.es  
60

1  
2  
3 Yasmina Hamam-Alcober. Email: yhamam@usj.es  
4  
5

6 Zaid AL-boloushi. Email: boloushi@me.com  
7  
8  
9

10  
11  
12 **WORD COUNT:** 3967 words.  
13  
14  
15

## 16 17 **ABSTRACT**

18  
19 **Introduction:** Patellar tendinopathy is a degenerative disease of the patellar tendon,  
20 which affects athletes from a variety of sports, and is especially predominant in sports  
21 involving high-impact jumping. The aim of this study is to determine the additional effect  
22 of two interventions combined with eccentric exercise and compare which one is the most  
23 effective at short and long-term follow-up for patients with patellar tendinopathy.  
24  
25  
26  
27  
28  
29

30  
31 **Methods and analysis:** This study is a randomized controlled trial with blinded  
32 participants. Measurements will be carried out by a specially trained blinded assessor. A  
33 sample of 57 patients with a medical diagnosis of patellar tendinopathy will participate  
34 in this study and will be divided into three treatment groups. Eligible participants will be  
35 randomly allocated to receive either: (a) treatment group with Percutaneous Needle  
36 Electrolysis, (b) treatment group with Dry Needling or (c) treatment group with placebo  
37 needling. In addition, all groups will perform eccentric exercise. Functionality and muscle  
38 strength parameters, pain, ultrasound appearances and patient perceived quality of life  
39 shall be evaluated using the VISA-p, jump test, VAS, US images and SF-36, respectively.  
40  
41  
42  
43  
44  
45  
46  
47  
48  
49  
50  
51  
52  
53  
54  
55  
56  
57  
58  
59  
60  
Participants will be assessed at baseline, at 10 weeks and at 22 weeks after baseline. The  
expected findings will allow us to advance in the treatment of this injury, as they will help  
determine whether a needling intervention has additional effects on an eccentric exercise  
program and whether any of the needling modalities is more effective than the other.

1  
2  
3 **Ethics and dissemination:** This protocol has been approved by the Ethics Committee of  
4 Aragon (N° PI15/0017). The trial will be conducted in accordance with the Declaration  
5 of Helsinki.  
6  
7

8  
9 **Trial Registration Number:** NCT02498795.  
10  
11

### 12 13 14 **Strengths and limitations of this study**

- 15  
16  
17 - This randomized clinical trial will report the effects on functionality and pain of three  
18 different treatment interventions in both the short and long term.  
19  
20  
21 - The double-blinded and placebo-control design will enhance objectivity and help reduce  
22 bias.  
23  
24  
25 - The effects of two minimally invasive treatments in physical therapy will be compared  
26 for the first time in patellar tendinopathy.  
27  
28  
29  
30  
31  
32

## 33 **INTRODUCTION**

34  
35 Patellar tendinopathy (PT), also known as jumper's knee, is a degenerative condition  
36 affecting the patellar tendon resulting in anterior knee pain associated with focal and  
37 palpable tenderness at the inferior pole of the patella. This disorder has similar histologic  
38 findings to other tendon disorders characterized by an increased thickness of the tendon  
39 and changes in vascularity, and cellularity, with incompletely healed tendon micro-  
40 ruptures and disturbed collagen distribution(1).  
41  
42  
43  
44  
45  
46  
47  
48

49 This degenerative condition affects athletes from a variety of sports, and is especially  
50 predominant in sports involving high-impact jumping. The overall prevalence of PT in  
51 non-elite players is 8.5%, although this figure increases in sports that place high demands  
52 on the patellar ligament, increasing up to 14.2% in volleyball athletes. Among elite  
53 volleyball and basketball players, a prevalence of 45% and 32%, respectively, has been  
54  
55  
56  
57  
58  
59  
60



1  
2  
3 reported. In addition, jumper's knee is almost twice as common among male non-elite  
4 athletes when compared with female athletes(2).

7 The diagnosis is typically based on the clinical history and symptomatic findings.  
8  
9  
10 Currently, imaging techniques, such as color-Doppler ultrasound (CD-US) and gray scale  
11  
12 ultrasound (GS-US) can be used for the assessment of the patellar tendon to clinically  
13  
14 confirm the diagnosis(3).

16  
17 Treatments used for PT fall into two major groups. The first group comprises medical  
18  
19 treatments which include non-steroidal anti-inflammatory drugs (NSAIDs), platelet-rich  
20  
21 plasma injection(4) and autologous growth factors(5). The second group consists of  
22  
23 physical therapies, including both conservative and invasive approaches (needling  
24  
25 techniques).

27  
28 Conservative therapies are generally accepted as the first line of approach for managing  
29  
30 PT(6, 7), considering exercise as the gold standard of treatment, either eccentric exercise  
31  
32 (EE) or high slow resistance training programs. Both have demonstrated similar  
33  
34 effectiveness in the treatment of PT(6-8). In 2012, EE was shown to be effective in the  
35  
36 treatment of tendinopathies at various locations of the body, including PT, with a greater  
37  
38 likelihood of clinical improvement when performed on a declined surface(6, 8, 9). In  
39  
40 recent years, further evidence now supports the fact that exercise is more effective than  
41  
42 other conventional treatments in tendinopathy, such as iontophoresis, US, Cyriax  
43  
44 treatment, etc.(10).

47  
48 Physical therapy approaches for PT continue to evolve and a number of innovative  
49  
50 treatment options are now available, such as dry needling (DN)(11), electrotherapeutic  
51  
52 invasive modalities (e.g. electrolysis)(12-14) and extracorporeal shockwave (ECSW)  
53  
54 therapy(15). Recently, research has focused on regenerative therapies with high  
55  
56 expectations of success because some of these techniques seem to achieve a rapid  
57  
58  
59  
60

1  
2  
3 regeneration of the injured tendon(11, 12, 16). However, evidence-based regenerative  
4 therapies are limited and there is no agreement to date regarding which of these is the  
5 most effective(17). DN consists of the insertion of a needle (filiform and solid, non-  
6 beveled) with the aim of provoking a local injury leading to an inflammatory response  
7 and the subsequent regeneration of the injured area in approximately one week. A study  
8 performed by Abat et al. reported that DN induced histological and mechanical changes  
9 in rat Achilles tendons at week one, with changes persisting at week four(18).  
10 Percutaneous Needle Electrolysis (PNE) is an ultrasound-guided technique used by  
11 physiotherapists consisting of causing localized lysis in the damaged and/or degenerated  
12 tissue by means of a galvanic current transmitted through an acupuncture needle. This  
13 technique may affect inflammatory mediators in damaged muscle tissue and influence the  
14 new vascularization of the injured area in rats(18). James et al.(11) carried out a cohort  
15 study in humans analyzing one group treated with DN and another treated with autologous  
16 blood injections. In both cases, they found improvements compared to the baseline  
17 measurements. However, this study failed to find differences between the different  
18 treatments, concluding that both techniques were equally effective. In relation to PNE, a  
19 former study(14) analyzed the treatment effect of electrolysis applied once a week in a  
20 group of patients without any control or comparative group, reporting that patients  
21 obtained statistically and clinically significant improvements compared to baseline  
22 measurements.

23  
24 From a biological point of view, it seems reasonable to hypothesize that a patient will  
25 obtain benefits thanks to the mechanical effects provided by the needle(16), and that  
26 patients may benefit more if the electrolysis effect is added to the mechanical stimuli  
27 provided by the needle(19).  
28  
29  
30  
31  
32  
33  
34  
35  
36  
37  
38  
39  
40  
41  
42  
43  
44  
45  
46  
47  
48  
49  
50  
51  
52  
53  
54  
55  
56  
57  
58  
59  
60

1  
2  
3 Therefore, the aim of this study is to determine the additional effect of two interventions  
4 combined with EE and compare which one is the most effective at short and long-term  
5  
6 follow-up for patients with PT.  
7  
8  
9  
10

## 11 **METHODS AND ANALYSIS**

### 12 **Study design**

13  
14  
15 The trial is designed as a randomized, controlled, participant, investigator and outcomes  
16 assessor blinded, experimental study, aimed at comparing three different physiotherapy  
17 protocols applied in three intervention groups of PT patients. Randomization will be  
18 performed as block randomization with a 1:1:1 allocation.  
19  
20  
21  
22  
23  
24

25  
26 This protocol follows the standards of the Helsinki Convention of good clinical practices.  
27  
28 The Ethics Committee of Aragon (CEICA) has evaluated the project and has given its  
29 favorable opinion and support, N° PI15/0017 (Appendix 1).  
30  
31

32  
33 The study has been carried out following the SPIRIT statement for clinical trial protocol  
34 and a SPIRIT Checklist has been included (Appendix 2).  
35  
36  
37  
38

### 39 **Study setting**

40  
41 After reviewing the literature and observing the high incidence of this pathology in  
42 amateur young adult athletes who perform sports and more specifically, jump sports,  
43 patient recruitment has been performed in basketball, football, volleyball, CrossFit, and  
44 handball sports clubs, together with running clubs and several gyms located in the city. A  
45 decision was made to conduct the study in X, where the university is located, as well as  
46 the laboratory to be used for assessments and treatments.  
47  
48  
49  
50  
51  
52

53  
54 The assessments will be conducted at the Motion Analysis laboratory of X, and the  
55 treatment will be performed at two different sites depending on the availability of both  
56 spaces and of schedules. Nonetheless, the same material will always be used.  
57  
58  
59  
60

## Participants

### *Inclusion criteria*

Participants eligible for inclusion in this study must meet the following criteria: 1. History of PT and anterior knee pain located on the inferior pole of the patella for over three months; 2. Aged between 18 and 45 years; 3. Palpation tenderness of the superior insertion of the patellar tendon; 4. A score below 80 on the VISA-p questionnaire.

### *Exclusion criteria*

Exclusion criteria for the study are: 1. Knee surgery within the previous six months; 2. Chronic joint diseases; 3. Corticosteroid injection in the patellar tendon within the previous three months; 4. Contraindications for needling; 5. Use of drugs 48 hours previously (e.g. NSAIDs); 6. Any other concomitant treatment for PT.

## Methodology

In the first session, all participants will be instructed on how to perform a daily home program of EE. This will consist of performing three sets of 15 single leg squat repetitions on a decline board every day, according to Alfredson's protocol(20) increasing the speed if participants do not have pain. Participants will be informed that exercise is allowed to reach 5 in a numerical pain rating scale(21), and if it is higher then they will stop and notify the researcher, attempting once again 24 h later following the same rules.

For the interventions, the participants will be placed in a supine position with a pillow under the knee (approximately 20° of knee flexion). The area will be cleansed with an antiseptic solution (70% Propan-2-ol, Skin-des). An ultrasound probe cover will be used during the intervention for infectious control. To determine the relevant treatment area, two factors will be considered: 1) Palpation of the areas exhibiting higher sensitivity and

1  
2  
3 that reproduce the patient's symptoms; 2) Tendon areas showing degenerative changes  
4  
5 assessed under ultrasound. Each group will receive a total of four sessions distributed  
6  
7 throughout eight weeks of treatment, once every two weeks.  
8  
9

10  
11  
12 *DN intervention combined with EE (DN-G) and PNE intervention combined with EE*  
13  
14 *(PNE-G)*  
15

16 Specific DN needles will be used during needling treatments, (Agu-punt, Spain).  
17  
18 Considering the thickness of the tendon and the approach, we shall use needles measuring  
19  
20 0.25 x 25 mm. The procedure will be guided by US to ensure the specificity of application  
21  
22 on the injured area and to guarantee that the procedure is safe for the patient. The DN  
23  
24 needle will reach the relevant treatment area (areas with degenerative PT changes). Each  
25  
26 session will consist of three needle insertions lasting three seconds each. In PNE-G  
27  
28 applications, an intensity of 3 mA galvanic current will be used during the three seconds  
29  
30 that the procedure lasts(19). The dose of 3 mA has demonstrated to be as effective as 6  
31  
32 mA in the treatment of tendinopathy injuries in animal models(18,19). In humans, a study  
33  
34 conducted in 2016 showed that a dose of 3 mA in PT generated structural changes  
35  
36 compatible with tendon regeneration, together with improvement of functionality and  
37  
38 pain (22). In contrast, the same study found that lower doses were effective only for the  
39  
40 improvement of functionality and pain. As a result, a 3 mA dose was selected for this  
41  
42 study.  
43  
44  
45  
46  
47  
48  
49

50  
51 *Control group (CG)*  
52

53 A sham needle will be placed upon the treatment zone, simulating the same procedure as  
54  
55 the rest of participants enrolled in the other groups. The needle will be placed in a specific  
56  
57 holder and will be manipulated during the intervention to simulate a real treatment. This  
58  
59  
60

holder will have a cover over the bottom part of the same in order to avoid the needle contacting the skin.

## Outcomes

### *Baseline data*

Baseline data will include gender, age, height, weight, body-mass index, affected side, level, sports and frequency of physical activity, duration of symptoms, medication and previous rehabilitation treatments and infiltrations received. A blinded observer will assess all participants at baseline, 10 weeks and 22 weeks after baseline. Participants will be asked to inform the researchers if there were any changes in medication or if they are receiving any other treatment or infiltration during the study.

### *Primary outcome measure*

Participants will complete the VISA-p questionnaire at baseline. The VISA-p questionnaire is designed to measure the severity of PT(23). The VISA-p score is the primary outcome variable. This scale consists of eight questions, the first six questions of which employ an analogical visual scale in order to assign a score of 0 to 10, where 10 represents the optimum state, for the purpose of quantifying pain and function in different activities, whereas the last two questions assess the level of functionality and ability to perform physical activity.

### *Secondary outcome measure*

During the first evaluation, participants will complete the Visual Analog Scale (VAS), considering the level of pain they feel while practicing their sport's activity. Participants will be explained that a score of 0 indicates the absence of pain whereas a score of 10 represents the maximum tolerable pain. They will also complete a questionnaire to assess their quality of life (SF-36)(24).

1  
2  
3 In order to assess tendon structure, an US evaluation using ultrasound equipment (Logic  
4 S7 Expert, General Electric Healthcare) and a linear probe (MLG-15 5–10 MHz) will be  
5 used. The ultrasonographic assessment protocol will be carried out according to the  
6 Musculoskeletal Ultrasound Technical Guidelines: Knee, defined by the European  
7 Society of Musculoskeletal Radiology(25). The ultrasonographic assessment will consist  
8 of a longitudinal sequence from the tendon origin to the insertion and transverse sections  
9 on the pole of the patella, the tendon body and its insertion on the tibial tuberosity, with  
10 the subject in supine position, with 20° knee flexion, and a pillow under the knee. The  
11 presence of degenerative signs compatible with the medical diagnosis of PT (thickness of  
12 the tendon, hypoechoic areas, irregularities affecting the cortical bone, calcifications) that  
13 could be relevant for the selection of the target area will also be assessed. In addition,  
14 CD-US assessment will be carried out to detect the presence of hypervascularization, with  
15 the subject in supine position and with the knee relaxed in full extension, in order to obtain  
16 further information to specifically define the target area.  
17  
18  
19  
20  
21  
22  
23  
24  
25  
26  
27  
28  
29  
30  
31  
32  
33  
34

35 Upon completion of the evaluation, a jump test will be carried out, measured with a force  
36 platform (FP4060-10-2000, Bertec Corporation). In this evaluation, subjects will warm  
37 up during 5 minutes on a treadmill, subsequently, they will perform dynamic stretches for  
38 the leg muscles. The Jump test will be explained to participants and they will be asked to  
39 demonstrate how they will perform the assessment to ensure that they have understood it  
40 before going to the platform. Later, patients will go to the platform forces and will  
41 perform each jump 3 times (squat jump, Abalakov jump and countermovement jump test)  
42 with 60 seconds between jumps and 2 minutes between different jumps (Table 1)(26-28).  
43 The maximum height of the jump will be analyzed via the measurement of the flight time  
44 recorded on the force platforms, the eccentric power and the maximum concentric force  
45 performed. The Abalakov jump will be performed with the subject standing in an upright  
46  
47  
48  
49  
50  
51  
52  
53  
54  
55  
56  
57  
58  
59  
60

1  
2  
3 position with a full arm swing. A rapid downward movement will be immediately  
4 followed by a rapid upward vertical movement as high as possible, all in one sequence.  
5  
6 The same procedure will be applied for the CMJ jump, however, this test will be  
7 performed with the hands on the hips to avoid arm swings. Finally, a Squat Jump will be  
8 performed with 90 degrees of flexion of the knee.  
9  
10  
11  
12  
13  
14  
15  
16

### 17 **Participant timeline**

18  
19 The study design will be a double-blind randomized controlled trial. The flow chart of  
20 the trial is shown in Figure 1 and the check list SPIRIT schedule is shown in Figure 2.  
21  
22  
23  
24  
25

### 26 **'Patient and Public Involvement'**

27  
28 Patients with PT were not involved in setting the research question or the outcome  
29 measures, however the concept of patient involvement translated to the execution phases  
30 of the research. Patients and their families were central to the dissemination of the  
31 information, which helped to recruit study participants. We intend to disseminate the main  
32 results to trial participants and will seek patient and public involvement in the  
33 development of an appropriate method of dissemination.  
34  
35  
36  
37  
38  
39  
40  
41  
42  
43  
44

### 45 **Sample size**

46  
47 Regarding the sample size, a calculation of statistical power was made prior to the study.  
48  
49 Accepting an alpha risk of 0.05 and a beta risk in a bilateral contrast, 19 subjects are  
50 needed in every treatment group to detect a difference equal or superior to 15 points on  
51 the VISA-p scale and assuming a standard deviation of 15 points(29). The estimated rate  
52 of loss to follow-up is 20%.  
53  
54  
55  
56  
57  
58  
59  
60



1  
2  
3 Recruitment of subjects for the trial will take place between October 2018 and March  
4  
5 2020 and will be carried out by means of informative campaigns targeted at different  
6  
7 Sports Clubs and Federations by means of e-mail and advertisements in the different  
8  
9 University mass media.

10  
11  
12 The interested subjects will receive an e-mail explaining the inclusion and exclusion  
13  
14 criteria, as well as the purpose of the study. If they meet the defined criteria, they will be  
15  
16 invited to send us their medical diagnosis.  
17  
18  
19  
20

### 21 **Recruitment**

22  
23 Participants will be recruited from sports clubs by the physiotherapist or the coach.  
24  
25 Contact has been made with various orthopedists who will collaborate with recruitment,  
26  
27 so that when they establish a diagnosis of this pathology in their examination room they  
28  
29 can refer us to the patients for their recruitment to the study.  
30  
31  
32  
33  
34

### 35 **Allocation**

36  
37 Participants will be randomly assigned to either CG or DN-G or PNE-G with a 1:1:1  
38  
39 allocation using an opaque envelope, with a block size of fifteen participants (5 for each  
40  
41 group).  
42  
43

44 Sealed opaque randomization envelopes with a study-specific participant number will be  
45  
46 supplied by an external statistician. A colleague not involved in the research study will  
47  
48 take the sealed opaque numbered envelopes in order, by number, and deliver the correct  
49  
50 envelope to the treating physical therapist. The envelope will contain a piece of paper,  
51  
52 which will be labelled with the same participant specific number, plus the group  
53  
54 assignment (PNE-G, DN-G or CG).  
55  
56  
57  
58  
59  
60

1  
2  
3 Participants who fulfill the inclusion criteria will receive the standardized oral and written  
4 information, and, once they grant their consent to take part in the trial, they will be  
5  
6 randomized into the three groups.  
7  
8  
9

### 10 11 12 **Blinding**

13  
14 Assessments regarding clinical recovery will be conducted by an assessor blinded to  
15 treatment allocation. Due to the nature of the intervention, participants can be blinded to  
16 allocation. Patients will be explained that they are going to receive a needling treatment,  
17 that it may be slightly painful, and that if at any time they are unable to tolerate the pain  
18 they must inform the researcher to stop the intervention. In order to blind patients, all the  
19 interventions were made with the ultrasound and the PNE device connected to simulate  
20 the same intervention in all groups. In contrast, the physiotherapist performing the  
21 intervention cannot be blinded, however he/she will be instructed not to disclose the  
22 allocation status of the participant at any time or during the follow up assessments. An  
23 employee outside the research team will feed data into the computer in separate datasheets  
24 so that the researchers can analyze data without having access to information about the  
25 allocation.  
26  
27  
28  
29  
30  
31  
32  
33  
34  
35  
36  
37  
38  
39  
40  
41

42 With the intention of evaluating patient blinding, an online questionnaire will be sent to  
43 participants upon completion of the study, asking them about the treatment they received.  
44  
45  
46  
47  
48

### 49 **Data collection methods**

50  
51 For the data collection, an oral questionnaire will be used containing questions targeted  
52 at collecting baseline data and information concerning the pathology.  
53  
54  
55  
56  
57  
58  
59  
60

1  
2  
3 Different questionnaires and assessment scales (VISA-p, VAS, SF-36) in Spanish will  
4  
5 be given to each participant in paper when they attend the assessment, and they will be  
6  
7 granted sufficient time to complete the same.  
8  
9

### 12 **Data management and statistical analysis**

14 In this study, all data will be entered electronically in the assessment room.

16 Original scales and questionnaires will be entered and kept on a locked file at the  
17  
18 participating site.  
19

21 Participant files are to be stored in numerical order and stored in a secure and accessible  
22  
23 place and manner. Participant files will be maintained in storage for a period of 2 years  
24  
25 after completion of the study.  
26

28 The statistical analysis will be carried out by an intention-to-treat analysis. Variables will  
29  
30 be described in number (percentage) and average (standard deviation) or median  
31  
32 (interquartile range) attending to their distribution. Quantitative variables will be  
33  
34 analyzed with the Shapiro Wilk test in order to confirm their distribution and to determine  
35  
36 correct statistical tests according to these results.  
37  
38

39 Outcomes will be analyzed using mixed linear and logistic regression models considering  
40  
41 participants as a random effect and group of treatment as fixed factors. Baseline  
42  
43 characteristics will be introduced in the model as covariance. Numbers needed to treat  
44  
45 index will also be calculated. The primary aim of the analysis will be to calculate the  
46  
47 difference obtained in the VISA-p score after the intervention (final measurement - initial  
48  
49 measurement). Finally, the magnitude of the effect of the result will be calculated and  
50  
51 therefore its clinical importance, by means of the following formula:  
52  
53

$$54 \quad I^* = \sqrt{\frac{F(1,dfR)}{F(1,dfR) + dfR}}$$

56 The significance level set for all the analysis will be  $p \leq 0.05$ .  
57  
58  
59  
60

## ETHICS AND DISEMINATION

The study design, procedures and informed consent procedure were approved and consequently the study will be carried out in compliance with the Helsinki Declaration of Human Rights. All participants will have to provide written Spanish informed consent.

Appendix 1.

The results for this trial will be published in peer-reviewed international journals or otherwise made publicly available and will be presented at national and international conferences and symposiums irrespective of the outcomes.

Any modifications to the protocol, which may impact the study procedures, potential patient benefits or may affect patient safety, including changes of study objectives, study design, patient population, sample sizes, study procedures, or significant administrative aspects will require a formal amendment to the protocol. Such amendments will be approved by the Ethics Committee prior to implementation and notified to the health authorities in accordance with local regulations.

All study-related information will be stored securely at the study site. All participant information will be stored in locked file cabinets in areas with limited access. All records that contain names or other personal identifiers, such as locator forms and informed consent forms, will be stored identified by code number. All local databases will be secured with password-protected access systems.

**Availability of data and material:** The datasets used and/or analyzed during the current study are available from the corresponding author on reasonable request.

## DISCUSSION

1  
2  
3 This study seeks to investigate the effects of physiotherapy needling techniques on pain,  
4  
5 functionality and quality of life in PT.  
6

7  
8 PT is a common cause of knee pain in cases of degeneration of the patellar tendon. Among  
9  
10 the causes of PT, extrinsic factors (e.g., patellar tendon loading with exercise) and  
11  
12 intrinsic factors (e.g., malalignment, high patella, imbalances) have been proposed(30).  
13  
14 Traditionally, the focus has been on quadriceps strengthening exercises and many reviews  
15  
16 have shown that the effect of the treatment could be estimated to give the patients a 50-  
17  
18 70% change of improvement on pain and functionality(6, 31, 32).  
19

20  
21 Regarding needling treatment, previous studies have shown a great improvement in PT  
22  
23 using PNE in combination with EE, with all patients reporting an improvement at least  
24  
25 one month after treatment(12-14, 18). This is an improvement compared to the minimum  
26  
27 three months needed to improve symptoms by applying other conventional techniques  
28  
29 (pharmacological and biological treatments, cold/heat techniques, shock waves, etc.)  
30  
31 Additionally, in a long-term study conducted in 2013, this technique was shown to  
32  
33 improve symptoms quickly and steadily for at least 10 years(33). These findings  
34  
35 demonstrate that this technique ensures that patients remain pain-free for a long period.  
36  
37 Furthermore, we were only able to find four articles(12-14, 18) addressing the application  
38  
39 of PNE for the recovery of PT, however, none of the articles studied were RCTs, which  
40  
41 entail limited evidence of the effectiveness of this technique.  
42  
43  
44  
45

46  
47 In addition, there are no standardized protocols for the application of PNE, which explains  
48  
49 the great variability in the number of sessions and application time based on the literature.  
50  
51 Therefore, this study aims to facilitate clinical practice and combine the available  
52  
53 methodology criteria in the application of this promising technique.  
54

55  
56 Regarding DN, the literature shows many similarities with PNE, since there is only one  
57  
58 RCT that compares functionality improvements among patients who have received PRP.  
59  
60

1  
2  
3 This study reflected that in the short term PRP had better results for pain and functionality,  
4  
5 however, DN was more effective than PRP after six months(34).  
6

7  
8 For the application of both needling techniques, US-guidance is normally used to be able  
9  
10 to observe firstly the presentation of the tendon, and later to observe the needle and enable  
11  
12 a much more specific treatment approach. However, US has disadvantages including its  
13  
14 operator dependence and the limited ability to rule out intra-articular disease. The  
15  
16 sensitivity and specificity of ultrasonography for patellar tendinopathy is between 58%  
17  
18 and 94%, respectively(35).  
19  
20

21  
22 Moreover, functionality of the tendon is usually measured with the VISA-p(36,37),  
23  
24 whereas jump tests (representing a similar action to that performed in subject's daily  
25  
26 sports) are only evaluated in a few papers(27,38). Countermovement jumps and squat  
27  
28 jumps are the most reliable and valid field tests for the estimation of the explosive power  
29  
30 of the lower limbs in physically active men(39). Thus, we will combine both, in order to  
31  
32 be more accurate in the assessment of the tendon's functionality, and be able to assess  
33  
34 changes that may affect their sport performance.  
35  
36

37  
38 This study has several strengths. First, we will evaluate two techniques that currently lack  
39  
40 strong evidence. However, in doing so, we are contributing to new knowledge in the field  
41  
42 of the recovery of musculoskeletal injuries. Second, the role of invasive techniques will  
43  
44 be determined by comparing the effects between these techniques and a control group.  
45  
46 The reliability of data is ensured, as both patients and the assessor will be blinded. Third,  
47  
48 a sub-analysis with US will be performed to investigate changes in the presence of  
49  
50 calcifications, cortical irregularities, neovascularization, thickness, eco-intensity, eco-  
51  
52 variation and eco-texture of the patellar tendon.  
53  
54  
55  
56  
57  
58  
59  
60

1  
2  
3 However, there are some limitations to this study. Blinding of the physiotherapist  
4 performing the intervention is not possible. Furthermore, follow-up is limited to 22 weeks  
5 after baseline.  
6  
7

8  
9  
10 The findings obtained may help advance the treatment of this injury by identifying the  
11 most effective treatment protocol and to avoid the associated consequences, such as the  
12 prevention of relapses and reducing the potential impact on the musculoskeletal system.  
13  
14  
15

## 16 17 18 19 REFERENCES

- 20  
21  
22 1. Knobloch K. The role of tendon microcirculation in Achilles and patellar  
23 tendinopathy. *Journal of orthopaedic surgery and research.* 2008;3:18.
- 24  
25 2. Zwerver J, Bredeweg SW, van den Akker-Scheek I. Prevalence of Jumper's Knee  
26 Among Nonelite Athletes From Different Sports A Cross-Sectional Survey. *American*  
27 *Journal of Sports Medicine.* 2011;39(9):1984-8.
- 28  
29 3. Stenroth L, Sefa S, Arokoski J, Toyras J. Does Magnetic Resonance Imaging  
30 Provide Superior Reliability for Achilles and Patellar Tendon Cross-Sectional Area  
31 Measurements Compared with Ultrasound Imaging? *Ultrasound Med Biol.*  
32 2019;45(12):3186-98.
- 33  
34 4. Taylor DW, Petrera M, Hendry M, Theodoropoulos JS. A Systematic Review of  
35 the Use of Platelet-Rich Plasma in Sports Medicine as a New Treatment for Tendon and  
36 Ligament Injuries. *Clinical Journal of Sport Medicine.* 2011;21(4):344-52.
- 37  
38 5. Andres BM, Murrell GAC. Treatment of tendinopathy: What works, what does  
39 not, and what is on the horizon. *Clinical Orthopaedics and Related Research.*  
40 2008;466(7):1539-54.
- 41  
42 6. Larsson MEH, Kall I, Nilsson-Helander K. Treatment of patellar tendinopathy-a  
43 systematic review of randomized controlled trials. *Knee Surgery Sports Traumatology*  
44 *Arthroscopy.* 2012;20(8):1632-46.
- 45  
46 7. Kongsgaard M, Kovanen V, Aagaard P, Doessing S, Hansen P, Laursen AH, et  
47 al. Corticosteroid injections, eccentric decline squat training and heavy slow resistance  
48 training in patellar tendinopathy. *Scandinavian Journal of Medicine & Science in Sports.*  
49 2009;19(6):790-802.  
50  
51  
52  
53  
54  
55  
56  
57  
58  
59  
60

- 1  
2  
3 8. Murtaugh B, Ihm JM. Eccentric Training for the Treatment of Tendinopathies.  
4 Current Sports Medicine Reports. 2013;12(3):175-82.  
5
- 6 9. Young MA, Cook JL, Purdam CR, Kiss ZS, Alfredson H. Eccentric decline squat  
7 protocol offers superior results at 12 months compared with traditional eccentric protocol  
8 for patellar tendinopathy in volleyball players. British Journal of Sports Medicine.  
9 2005;39(2):102-5.  
10
- 11 10. Ortega-Castillo M, Medina-Porqueres I. Effectiveness of the eccentric exercise  
12 therapy in physically active adults with symptomatic shoulder impingement or lateral  
13 epicondylar tendinopathy: A systematic review. J Sci Med Sport. 2016;19(6):438-53.  
14
- 15 11. James SLJ, Ali K, Pocock C, Robertson C, Walter J, Bell J, et al. Ultrasound  
16 guided dry needling and autologous blood injection for patellar tendinosis. British Journal  
17 of Sports Medicine. 2007;41(8):518-21.  
18
- 19 12. Abat F DW, Gelber PE, Polidori F, Monllau JC, Sanchez-Ibañez JM.  
20 Effectiveness of the Intratissue Percutaneous Electrolysis (EPI®) technique and  
21 isoinertial eccentric exercise in the treatment of patellar tendinopathy at two years follow-  
22 up. Muscles Ligaments Tendons J. 2014;14(4):188-93.  
23
- 24 13. Valera Garrido F, Minaya Muñoz F, JM SI. Effectiveness of electrolysis  
25 percutaneous intratissular (EPI®) in chronic insertional patellar tendinopathy. Trauma  
26 Fund MAPFRE. 2010;21(4):227-36.  
27
- 28 14. Sánchez-Ibañez J, Alves R, Polidori F, Valera F, Minaya F, Valles-Martí S, et al.  
29 Effectiveness of ultrasound-guided percutaneous electrolysis intratendon (EPI) in the  
30 treatment of insertional patellar tendinopathy in soccer players. Br J Sports Med.  
31 2013;47(e2).  
32
- 33 15. Zwerver J, Verhagen E, Hartgens F, van den Akker-Scheek I, Diercks RL. The  
34 TOPGAME-study: effectiveness of extracorporeal shockwave therapy in jumping  
35 athletes with patellar tendinopathy. Design of a randomised controlled trial. BMC  
36 Musculoskeletal Disorders. 2010;11:6.  
37
- 38 16. Riggan CN, Chen M, Gordon JA, Schultz SM, Soslowsky LJ, Khoury V.  
39 Ultrasound-Guided Dry Needling of the Healthy Rat Supraspinatus Tendon Elicits Early  
40 Healing Without Causing Permanent Damage. J Orthop Res. 2019;37(9):2035-42.  
41
- 42 17. Krey D, Borchers J, McCamey K. Tendon needling for treatment of tendinopathy:  
43 A systematic review. Physician and Sportsmedicine. 2015;43(1):80-6.  
44  
45  
46  
47  
48  
49  
50  
51  
52  
53  
54  
55  
56  
57  
58  
59  
60



18. Abat F, Valles S-L, Gelber P-E, Polidori F, Jorda A, Garcia-Herreros S, et al. An experimental study of muscular injury repair in a mouse model of notexin-induced lesion with EPI technique. *BMC sports science, medicine and rehabilitation*. 2015;7:7-.
19. Valera-Garrido, F, Minaya-Muñoz, F, Sánchez-Ibáñez, JM. Comparison of the acute inflammatory response and proliferation of dry needling and electrolysis percutaneous intratissue (epi) in healthy rat Achilles tendons. *Br J Sports Med*. 2013;47(9):e2-e2.
20. Alfredson H, Pietila T, Jonsson P, Lorentzon P. Heavy-load eccentric calf muscle training for the treatment of chronic Achilles tendinosis. *American Journal of Sports Medicine*. 1998;26(3):360-6.
21. Silbernagel KG, Crossley KM. A Proposed Return-to-Sport Program for Patients With Midportion Achilles Tendinopathy: Rationale and Implementation. *J Orthop Sports Phys Ther*. 2015;45(11):876-86.
22. Padrón-Benítez, A, Rojas-Mederos, S. A comparative study between low and high intensity percutaneous needle electrolysis in patients with patellar tendinopathy: a structural and functional analysis. *J Invasive Tech Phys Ther*. 2016;1(1):10-17.
23. Hernandez-Sanchez S, Hidalgo MD, Gomez A. Cross-cultural Adaptation of VISA-P Score for Patellar Tendinopathy in Spanish Population. *Journal of Orthopaedic & Sports Physical Therapy*. 2011;41(8):581-91.
24. Alonso J, Prieto L, Anto JM. The spanish version of the SF-36 health survey- A measure of clinical outcomes. *Medicina Clinica*. 1995;104(20):771-6.
25. Martinoli C. Musculoskeletal ultrasound: technical guidelines. *Insights into imaging*. 2010;1(3):99-141.
26. Rodriguez-Rosell D, Mora-Custodio R, Franco-Marquez F, Yanez-Garcia JM, Gonzalez-Badillo JJ. Traditional vs. Sport-Specific Vertical Jump Tests: Reliability, Validity, and Relationship With the Legs Strength and Sprint Performance in Adult and Teen Soccer and Basketball Players. *J Strength Cond Res*. 2017;31(1):196-206.
27. Helland C, Bojsen-Moller J, Raastad T, Seynnes OR, Moltubakk MM, Jakobsen V, et al. Mechanical properties of the patellar tendon in elite volleyball players with and without patellar tendinopathy. *Br J Sports Med*. 2013;47(13):862-8.
28. Gual G, Fort-Vanmeerhaeghe A, Romero-Rodriguez D, Tesch PA. Effects of In-Season Inertial Resistance Training With Eccentric Overload in a Sports Population at Risk for Patellar Tendinopathy. *J Strength Cond Res*. 2016;30(7):1834-42.

- 1  
2  
3 29. Scott A, LaPrade RF, Harmon KG, Filardo G, Kon E, Della Villa S, et al. Platelet-  
4 Rich Plasma for Patellar Tendinopathy: A Randomized Controlled Trial of Leukocyte-  
5 Rich PRP or Leukocyte-Poor PRP Versus Saline. *Am J Sports Med.*  
6 2019;363546519837954.  
7  
8  
9  
10 30. Figueroa D, Figueroa F, Calvo R. Patellar Tendinopathy: Diagnosis and  
11 Treatment. *J Am Acad Orthop Surg.* 2016;24(12):e184-e92.  
12  
13 31. Lian OB, Engebretsen L, Bahr R. Prevalence of jumper's knee among elite athletes  
14 from different sports - A cross-sectional study. *American Journal of Sports Medicine.*  
15 2005;33(4):561-7.  
16  
17 32. Visnes H, Bahr R. The evolution of eccentric training as treatment for patellar  
18 tendinopathy (jumper's knee): a critical review of exercise programmes. *British Journal*  
19 *of Sports Medicine.* 2007;41(4):217-23.  
20  
21 33. Abat F, Gelber PE, Polidori F, Monllau JC, Sanchez-Ibanez JM. Clinical results  
22 after ultrasound-guided intratissue percutaneous electrolysis (EPIA (R)) and eccentric  
23 exercise in the treatment of patellar tendinopathy. *Knee Surgery Sports Traumatology*  
24 *Arthroscopy.* 2015;23(4):1046-52.  
25  
26 34. Drago JL, Wasterlain AS, Braun HJ, Nead KT. Platelet-Rich Plasma as a  
27 Treatment for Patellar Tendinopathy A Double-Blind, Randomized Controlled Trial.  
28 *American Journal of Sports Medicine.* 2014;42(3):610-8.  
29  
30 35. Warden SJ, Kiss ZS, Malara FA, Ooi ABT, Cook JL, Crossley KM. Comparative  
31 accuracy of magnetic resonance imaging and ultrasonography in confirming clinically  
32 diagnosed patellar tendinopathy. *American Journal of Sports Medicine.* 2007;35(3):427-  
33 36.  
34  
35 36. Hernandez-Sanchez S, Hidalgo MD, Gomez A. Cross-cultural adaptation of  
36 VISA-P score for patellar tendinopathy in Spanish population. *J Orthop Sports Phys Ther.*  
37 2011;41(8):581-91.  
38  
39 37. Andriolo L, Altamura SA, Reale D, Candrian C, Zaffagnini S, Filardo G.  
40 Nonsurgical Treatments of Patellar Tendinopathy: Multiple Injections of Platelet-Rich  
41 Plasma Are a Suitable Option: A Systematic Review and Meta-analysis. *Am J Sports*  
42 *Med.* 2019;47(4):1001-18.  
43  
44 38. de Vries A, Zwerver J, Diercks R, Tak I, van Berkel S, van Cingel R, et al. Effect  
45 of patellar strap and sports tape on pain in patellar tendinopathy: A randomized controlled  
46 trial. *Scand J Med Sci Sports.* 2016;26(10):1217-24.  
47  
48  
49  
50  
51  
52  
53  
54  
55  
56  
57  
58  
59  
60

1  
2  
3 39. Markovic G, Dizdar D, Jukic I, Cardinale M. Reliability and factorial validity of  
4 squat and countermovement jump tests. J Strength Cond Res. 2004;18(3):551-5.  
5  
6  
7  
8

9  
10 **AUTHOR'S CONTRIBUTIONS**

11 MPL, EMG and PH conceived of the idea, and developed the intervention. MPL and PH  
12 wrote the article. MPL, MO, RMG, AVB, ZA, YH and PH developed the design of the  
13 trial. MO were involved in development of the statistical analysis of the trial and  
14 contributed to the content of the article. AVB contributed to the design and writing of the  
15 jump test protocol. All authors have read and approved the final manuscript.  
16  
17  
18  
19  
20  
21  
22  
23  
24  
25  
26  
27

28 **FUNDING STATEMENT**

29 This research received no specific grant from any funding agency in the public,  
30 commercial or not-for-profit sectors.  
31  
32  
33  
34  
35

36 **COMPETING INTEREST STATEMENT**

37 The authors declare that they have no competing interests.  
38  
39

40 Competing interest: None declared.  
41  
42  
43  
44  
45  
46  
47  
48  
49  
50  
51  
52  
53  
54  
55  
56  
57  
58  
59  
60

1  
2  
3  
4  
5  
6  
7  
8  
9  
10  
11  
12  
13  
14  
15  
16  
17  
18  
19  
20  
21  
22  
23  
24  
25  
26  
27  
28  
29  
30  
31  
32  
33  
34  
35  
36  
37  
38  
39  
40  
41  
42  
43  
44  
45  
46  
47  
48  
49  
50  
51  
52  
53  
54  
55  
56  
57  
58  
59  
60

## TABLES

Table 1. Jump test's protocol.

| <b>JUMP TEST PROTOCOL</b>                                                                                                                                                                                                                                    |                                                                              |
|--------------------------------------------------------------------------------------------------------------------------------------------------------------------------------------------------------------------------------------------------------------|------------------------------------------------------------------------------|
| 5-minute warm-up consisting of steady jogging on a treadmill                                                                                                                                                                                                 |                                                                              |
| Dynamic Stretches lasting 5 minutes, as instructed by the physical therapist                                                                                                                                                                                 | Psoas<br>Quadriceps<br>Gluteus maximus<br>Gastrocnemius<br>Hamstring muscles |
| Three jump tests are performed<br>- 3 jumps off the ground for 3 times for the patient to become familiar with the tests<br>- The subject is placed on the platform and asked to perform each test 3 times, with 60 seconds rest between the different tests | Abalakov test<br>Countermovement jump test<br>Squat jump                     |
| The highest jump is selected for the study                                                                                                                                                                                                                   |                                                                              |

## FIGURES

Figure 1. Flow diagram. Randomized controlled trial design.

G-PNE: Percutaneous Needle Electrolysis Group. G-DN: Dry Needle Group.

Figure 2. Schedule for the enrolment and intervention.

Schedule for enrolment and intervention per cluster. -t1: baseline; t1-t2: intervention period; t2: 8 weeks after baseline; t3: 10 weeks after baseline; t4: 3 months after baseline. G-PNE: Percutaneous Needle Electrolysis Group; G-DN: Dry Needle Group; US: ultrasound.

1  
2  
3  
4  
5  
6  
7  
8  
9  
10  
11  
12  
13  
14  
15  
16  
17  
18  
19  
20  
21  
22  
23  
24  
25  
26  
27  
28  
29  
30  
31  
32  
33  
34  
35  
36  
37  
38  
39  
40  
41  
42  
43  
44  
45  
46  
47  
48  
49  
50  
51  
52  
53  
54  
55  
56  
57  
58  
59  
60

For peer review only

Figure 1. Flow diagram. Randomized controlled trial design.

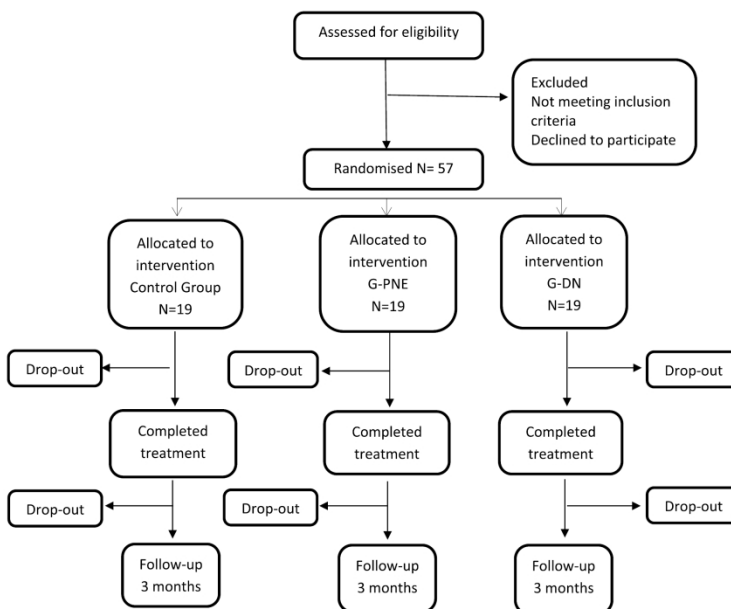

210x297mm (300 x 300 DPI)

Figure 2. Schedule for enrolment and intervention.

|                                         | Enrolment | Allocation | Close-out |       |       |       |
|-----------------------------------------|-----------|------------|-----------|-------|-------|-------|
| TIMEPOINT**                             | $-t_1$    | 0          | $t_1$     | $t_2$ | $t_3$ | $t_4$ |
| <b>ENROLMENT:</b>                       |           |            |           |       |       |       |
| Eligibility screen                      | X         |            |           |       |       |       |
| Informed consent                        | X         |            |           |       |       |       |
| Allocation                              |           | X          |           |       |       |       |
| <b>INTERVENTIONS:</b>                   |           |            |           |       |       |       |
| <i>Control group</i>                    |           |            | ↔         |       |       |       |
| <i>G-PNE</i>                            |           |            | ↔         |       |       |       |
| <i>G-DN</i>                             |           |            | ↔         |       |       |       |
| <b>ASSESSMENTS:</b>                     |           |            |           |       |       |       |
| <i>Baseline demographic information</i> | X         |            |           |       |       |       |
| <i>VISA-P</i>                           | X         |            | X         |       | X     | X     |
| <i>VAS</i>                              |           |            | X         |       | X     | X     |
| <i>SF-36</i>                            |           |            | X         |       | X     | X     |
| <i>Tendon structure US</i>              |           |            | X         |       | X     | X     |
| <i>Jump test</i>                        |           |            | X         |       | X     | X     |

215x279mm (300 x 300 DPI)

## DOCUMENTO DE INFORMACIÓN AL PACIENTE

### Fecha:

**Título del proyecto:** “ESTUDIO COMPARATIVO ENTRE TÉCNICAS DE PUNCIÓN PARA EL TRATAMIENTO DE LA TENDINOPATÍA CRÓNICA DEL TENDÓN ROTULIANO”

### Investigador principal:

Doña: M<sup>a</sup> Pilar López Royo

Este estudio se basa en el estudio comparativo de tratamientos que utilizan distintas técnicas de fisioterapia invasiva junto con un programa de ejercicio excéntrico para el tratamiento de la tendinopatía rotuliana. Por medio del tratamiento se produce una disminución del dolor asociado a esta patología y un aumento de la fuerza de la pierna, lo que a su vez hace que mejore la funcionalidad en las actividades de la vida diaria y mejore la calidad de vida.

### PROCESO DE SELECCIÓN DE PACIENTES

#### Criterios de inclusión:

- Edad comprendida entre 18 y 40 años.
- Practicar cualquier deporte de forma habitual.
- Pacientes con diagnóstico médico de tendinopatía rotuliana crónica con un mínimo de 3 meses de evolución y con sintomatología.
- Dolor a la palpación del tendón en el polo inferior de la rótula y durante el entrenamiento o competición.
- Puntuación del cuestionario VISA-P menor de 80 (el resultado obtenido de rellenar el cuestionario tiene que ser menor de 80 puntos de los 100 posibles para poder participar en el estudio).

#### Criterios de exclusión:

- Paciente operado de la rodilla afectada en los últimos 6 meses.
- Infiltraciones en la rodilla afectada en los últimos 3 meses.
- Paciente que ha recibido tratamiento farmacológico o fisioterápico en las últimas 48 horas o durante el estudio.
- Patología con menos de 3 meses de evolución.
- Presentar tendinopatía rotuliana bilateral.
- Puntuación del cuestionario VISA-p mayor o igual de 80 (el resultado obtenido de rellenar el cuestionario no puede ser igual o superar los 80 puntos de los 100 posibles, sino no podrá participar en el estudio).
- Imposibilidad para aplicar alguna de las técnicas de tratamiento o valoración por



1  
2                    contraindicación absoluta o relativa.  
3  
4  
5  
6

## 7       **PROCEDIMIENTO**

8       El tratamiento consiste en realizar un protocolo de ejercicios excéntricos de cuádriceps que  
9       realizará en casa de forma diaria, y que serán revisados con el fisioterapeuta para valorar su  
10       correcta realización. Se complementará el tratamiento con la aplicación de una técnica de punción  
11       según el protocolo de tratamiento propuesto de forma totalmente **aleatorizada** y según los  
12       criterios diagnósticos específicos de la misma, siguiendo las indicaciones, criterios de aplicación y  
13       criterios diagnósticos.  
14

15       Son técnicas de punción cuyo objetivo es producir una respuesta inflamatoria aguda que active los  
16       mecanismos fisiológicos de regeneración del tejido y mejorar el dolor y la funcionalidad en la  
17       articulación de la rodilla, se realiza con agujas de punción seca, similares a las agujas de  
18       acupuntura y sin infiltrar ningún tipo de sustancia dentro del organismo.  
19  
20  
21  
22  
23

24  
25       Los registros serán realizados en el Espacio de Valoración Funcional de la Universidad San Jorge,  
26       en la Facultad de Ciencias de la Salud, Edificio III. Se pondrá a su disposición la posibilidad de  
27       utilizar el autobús que utiliza el personal y alumnado de la universidad (en el horario que éste esté  
28       disponible). Las fechas y horarios serán convenidas con cada participante en función de su  
29       disponibilidad y la de los investigadores, buscando la conformidad de todos. La duración  
30       aproximada del estudio para cada paciente será de 30 minutos, aunque este horario podrá variar  
31       en función de los acontecimientos.  
32  
33  
34  
35  
36

37  
38       Será recibido por los miembros del equipo de investigación y una vez allí, se le realizará un primer  
39       análisis fisioterápico, rellenará una encuesta, una escala analógica visual (EVA) del dolor y el  
40       cuestionario Visa-p en el que se valorará la funcionalidad de la rodilla.  
41  
42

43       Tras éste primer registro se le colocará un marcador pasivo en el pantalón. Se le pedirá que  
44       realice el siguiente protocolo:  
45

- 46       - Calentamiento de 5 minutos en cinta a ritmo constante.
- 47       - Estiramientos dinámicos de psoas, cuádriceps, glúteo, gastrocnemios, isquiotibiales durante 5
- 48       minutos instruidos por el fisioterapeuta.
- 49       - Realización de los 3 saltos fuera de la plataforma durante 3 veces para que se familiarice con los
- 50       tests.
- 51       - En la plataforma de fuerzas realizará 3 test de salto: el test de Abalakov (ABK), el test de salto
- 52       con contramovimiento (CMJ) y el squatjump (SJ).
- 53
- 54       Se colocará en la plataforma y realizará 3 saltos de cada uno de los test con una separación entre
- 55       ellos de 60 segundos.
- 56
- 57       Se valora el tendón por ecografía, y se recogen datos por medio de personal adiestrado y se envía
- 58
- 59
- 60

1 a personal especialista en radiodiagnóstico.

2  
3 Tras los registros de los saltos se dará por finalizada la valoración.

4  
5  
6 Tras la 1ª valoración, se realizará una división en tres grupos de los pacientes de forma  
7 aleatorizada.

8  
9 Se le realizará el protocolo de tratamiento de fisioterapia invasiva que le haya correspondido.  
10 Realizará una sesión del tratamiento cada 14 días, y se realizará la 2ª valoración 1 semana más  
11 tarde de la 4ª sesión de punción para valorar los cambios que se hayan producido tras el  
12 tratamiento, repitiéndose de nuevo el proceso de recogida de datos realizado al inicio del estudio.  
13 Se realizará un seguimiento a los tres meses de la valoración post-tratamiento para valorar la  
14 eficacia de la técnica a largo plazo del tratamiento.

15  
16 El procedimiento se realizará guiado ecográficamente para asegurar la especificidad de aplicación  
17 sobre la zona relevante de tratamiento y garantizar la seguridad de la técnica. Se hace posterior a  
18 esta intervención una serie de ejercicios excéntricos de cuádriceps. El tratamiento se realizará  
19 durante 4 sesiones (a razón de una sesión cada 14 días).

## 26 **RIESGOS**

27 La aplicación de las técnicas de punción utilizadas no han demostrado tener ningún efecto  
28 secundario hasta la fecha, aunque el paciente puede experimentar dolor durante y tras la punción,  
29 generalmente de uno o dos días de duración.

## 34 **RESPONSABILIDADES DEL PARTICIPANTE**

35 La información que usted posea sobre su estado de salud o sobre sensaciones previas  
36 anormales al realizarle una punción, puede afectar la seguridad o el valor de estas pruebas. La  
37 rápida comunicación por su parte de las sensaciones que experimenta al realizar esta prueba es  
38 también de gran importancia. Usted es responsable de revelar esa información al personal de la  
39 prueba cuando se le pregunte.

## 45 **PREGUNTAS**

46 Le animamos a que haga cualquier pregunta sobre los procedimientos seguidos o sus resultados  
47 en la prueba. Si tiene alguna preocupación o pregunta, por favor pídasenos más información, para  
48 ello le dejamos un correo electrónico [mapilr86@hotmail.com](mailto:mapilr86@hotmail.com) y un número de teléfono móvil:  
49 616102365.

## 54 **LIBERTAD PARA DAR EL CONSENTIMIENTO**

55 Usted participa en el estudio de manera voluntaria, pudiendo abandonarlo en el momento  
56 que considere oportuno, sin que esto conlleve ninguna repercusión negativa para usted.

57 Los datos obtenidos en el estudio serán confidenciales y únicamente se hará uso de ellos

1  
2 para el cumplimiento de los objetivos planteados en la investigación. No se cederán estos datos a  
3  
4 terceros sin el consentimiento expreso de los sujetos participantes a quienes pertenezcan los  
5  
6 datos.

7 En esta investigación se garantizará el anonimato de los sujetos que aportan los datos,  
8  
9 estableciendo un código disociado para identificarlos que sólo será conocido por los responsables  
10  
11 de la realización del trabajo de campo.  
12  
13  
14  
15  
16

17 Fdo: M<sup>a</sup> Pilar López Royo  
18  
19  
20  
21  
22  
23  
24  
25  
26  
27  
28  
29  
30  
31  
32  
33  
34  
35  
36  
37  
38  
39  
40  
41  
42  
43  
44  
45  
46  
47  
48  
49  
50  
51  
52  
53  
54  
55  
56  
57  
58  
59  
60

## MODELO DE CONSENTIMIENTO INFORMADO

Título del PROYECTO: “ESTUDIO COMPARATIVO ENTRE TÉCNICAS DE PUNCIÓN PARA EL TRATAMIENTO DE LA TENDINOPATÍA CRÓNICA DEL TENDÓN ROTULIANO”

Doña: M<sup>a</sup> Pilar López Royo ([mapilr86@hotmail.com](mailto:mapilr86@hotmail.com))  
Departamento de Fisiatría y Enfermería  
UNIVERSIDAD DE ZARAGOZA

Yo, ..... (nombre y apellidos del participante)

He recibido suficiente información en relación con el proyecto, he leído la hoja de información que se me ha entregado y he podido hacer preguntas sobre el proyecto, recibiendo respuestas satisfactorias.

Entiendo que la participación es voluntaria y que puedo abandonar el proyecto:

- . Cuando lo desee
- . Sin tener que dar explicaciones
- . Sin que esto repercuta en mis cuidados médicos

He sido claramente informado de forma clara y precisa del tratado que recibirán mis datos personales que se contienen en este proyecto, sabiendo que los datos serán tratados y custodiados bajo mi intimidad y a la vigente normativa de la protección de datos, y que sobre estos datos me asisten los derechos de rectificación, acceso y oposición comunicándolo al investigador principal que figura en este consentimiento.

Declaro que presto libremente mi conformidad para participar en el estudio.

Deseo ser informado sobre los resultados del estudio:      sí      no      (marque lo que proceda)

Así pues, acepto que las muestras derivadas de este proyecto puedan ser utilizadas en futuras investigaciones siempre y cuando están relacionadas con ésta.

Por lo tanto, doy mi conformidad para que mis datos clínicos sean revisados por personal ajeno al centro, para los fines del estudio, y soy consciente de que este consentimiento es

1  
2  
3  
4  
5  
6  
7  
8  
9  
10  
11  
12  
13  
14  
15  
16  
17  
18  
19  
20  
21  
22  
23  
24  
25  
26  
27  
28  
29  
30  
31  
32  
33  
34  
35  
36  
37  
38  
39  
40  
41  
42  
43  
44  
45  
46  
47  
48  
49  
50  
51  
52  
53  
54  
55  
56  
57  
58  
59  
60

revocable.

Firma del participante: \_\_\_\_\_

Fecha: \_\_\_\_\_

He explicado la naturaleza y el propósito del proyecto al paciente mencionado

Firma del Investigador: \_\_\_\_\_

Fecha: \_\_\_\_\_

Consentimiento informado estudio \_\_\_\_\_

Versión \_\_\_\_\_, fecha \_\_\_\_\_

## Appendix 2. Checklist SPIRIT

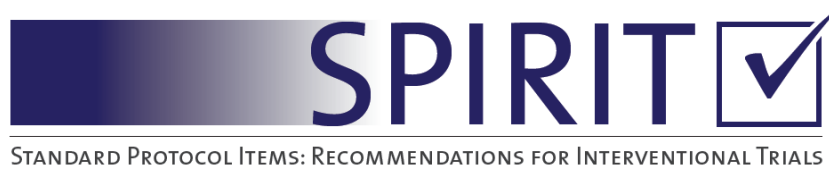

SPIRIT 2013 Checklist: Recommended items to address in a clinical trial protocol and related documents\*

| Section/item                      | Item No | Description                                                                                                                                                                                                                                                                              | Addressed on page number |
|-----------------------------------|---------|------------------------------------------------------------------------------------------------------------------------------------------------------------------------------------------------------------------------------------------------------------------------------------------|--------------------------|
| <b>Administrative information</b> |         |                                                                                                                                                                                                                                                                                          |                          |
| Title                             | 1       | Descriptive title identifying the study design, population, interventions, and, if applicable, trial acronym                                                                                                                                                                             | 1                        |
| Trial registration                | 2a      | Trial identifier and registry name. If not yet registered, name of intended registry                                                                                                                                                                                                     | 1-3                      |
|                                   | 2b      | All items from the World Health Organization Trial Registration Data Set                                                                                                                                                                                                                 | 2-3                      |
| Protocol version                  | 3       | Date and version identifier                                                                                                                                                                                                                                                              | N/A                      |
| Funding                           | 4       | Sources and types of financial, material, and other support                                                                                                                                                                                                                              | 22                       |
| Roles and responsibilities        | 5a      | Names, affiliations, and roles of protocol contributors                                                                                                                                                                                                                                  | 22                       |
|                                   | 5b      | Name and contact information for the trial sponsor                                                                                                                                                                                                                                       | 22                       |
|                                   | 5c      | Role of study sponsor and funders, if any, in study design; collection, management, analysis, and interpretation of data; writing of the report; and the decision to submit the report for publication, including whether they will have ultimate authority over any of these activities | N/A                      |
|                                   | 5d      | Composition, roles, and responsibilities of the coordinating centre, steering committee, endpoint adjudication committee, data management team, and other individuals or groups overseeing the trial, if applicable (see Item 21a for data monitoring committee)                         | N/A                      |
| <b>Introduction</b>               |         |                                                                                                                                                                                                                                                                                          |                          |
| Background and rationale          | 6a      | Description of research question and justification for undertaking the trial, including summary of relevant studies (published and unpublished) examining benefits and harms for each intervention                                                                                       | 3-5                      |
|                                   | 6b      | Explanation for choice of comparators                                                                                                                                                                                                                                                    | 3-5                      |
| Objectives                        | 7       | Specific objectives or hypotheses                                                                                                                                                                                                                                                        | 5-6                      |

|                                                                     |     |                                                                                                                                                                                                                                                                                                                                                                                |       |
|---------------------------------------------------------------------|-----|--------------------------------------------------------------------------------------------------------------------------------------------------------------------------------------------------------------------------------------------------------------------------------------------------------------------------------------------------------------------------------|-------|
| Trial design                                                        | 8   | Description of trial design including type of trial (eg, parallel group, crossover, factorial, single group), allocation ratio, and framework (eg, superiority, equivalence, noninferiority, exploratory)                                                                                                                                                                      | 6     |
| <b>Methods: Participants, interventions, and outcomes</b>           |     |                                                                                                                                                                                                                                                                                                                                                                                |       |
| Study setting                                                       | 9   | Description of study settings (eg, community clinic, academic hospital) and list of countries where data will be collected. Reference to where list of study sites can be obtained                                                                                                                                                                                             | 6     |
| Eligibility criteria                                                | 10  | Inclusion and exclusion criteria for participants. If applicable, eligibility criteria for study centres and individuals who will perform the interventions (eg, surgeons, psychotherapists)                                                                                                                                                                                   | 7     |
| Interventions                                                       | 11a | Interventions for each group with sufficient detail to allow replication, including how and when they will be administered                                                                                                                                                                                                                                                     | 7-9   |
|                                                                     | 11b | Criteria for discontinuing or modifying allocated interventions for a given trial participant (eg, drug dose change in response to harms, participant request, or improving/worsening disease)                                                                                                                                                                                 | N/A   |
|                                                                     | 11c | Strategies to improve adherence to intervention protocols, and any procedures for monitoring adherence (eg, drug tablet return, laboratory tests)                                                                                                                                                                                                                              | 8     |
|                                                                     | 11d | Relevant concomitant care and interventions that are permitted or prohibited during the trial                                                                                                                                                                                                                                                                                  | 8     |
| Outcomes                                                            | 12  | Primary, secondary, and other outcomes, including the specific measurement variable (eg, systolic blood pressure), analysis metric (eg, change from baseline, final value, time to event), method of aggregation (eg, median, proportion), and time point for each outcome. Explanation of the clinical relevance of chosen efficacy and harm outcomes is strongly recommended | 9-11  |
| Participant timeline                                                | 13  | Time schedule of enrolment, interventions (including any run-ins and washouts), assessments, and visits for participants. A schematic diagram is highly recommended (see Figure)                                                                                                                                                                                               | 11    |
| Sample size                                                         | 14  | Estimated number of participants needed to achieve study objectives and how it was determined, including clinical and statistical assumptions supporting any sample size calculations                                                                                                                                                                                          | 11-12 |
| Recruitment                                                         | 15  | Strategies for achieving adequate participant enrolment to reach target sample size                                                                                                                                                                                                                                                                                            | 12    |
| <b>Methods: Assignment of interventions (for controlled trials)</b> |     |                                                                                                                                                                                                                                                                                                                                                                                |       |
| Allocation:                                                         |     |                                                                                                                                                                                                                                                                                                                                                                                |       |
| Sequence generation                                                 | 16a | Method of generating the allocation sequence (eg, computer-generated random numbers), and list of any factors for stratification. To reduce predictability of a random sequence, details of any planned restriction (eg, blocking) should be provided in a separate document that is unavailable to those who enrol participants or assign interventions                       | 12-13 |
| Allocation concealment mechanism                                    | 16b | Mechanism of implementing the allocation sequence (eg, central telephone; sequentially numbered, opaque, sealed envelopes), describing any steps to conceal the sequence until interventions are assigned                                                                                                                                                                      | 12-13 |

|    |                                                           |     |                                                                                                                                                                                                                                                                                                                                                                                                              |       |
|----|-----------------------------------------------------------|-----|--------------------------------------------------------------------------------------------------------------------------------------------------------------------------------------------------------------------------------------------------------------------------------------------------------------------------------------------------------------------------------------------------------------|-------|
| 1  |                                                           |     |                                                                                                                                                                                                                                                                                                                                                                                                              |       |
| 2  |                                                           |     |                                                                                                                                                                                                                                                                                                                                                                                                              |       |
| 3  |                                                           |     |                                                                                                                                                                                                                                                                                                                                                                                                              |       |
| 4  | Implemen                                                  | 16c | Who will generate the allocation sequence, who will enrol participants, and who will assign participants to interventions                                                                                                                                                                                                                                                                                    | 13    |
| 5  | tation                                                    |     |                                                                                                                                                                                                                                                                                                                                                                                                              |       |
| 6  | Blinding                                                  | 17a | Who will be blinded after assignment to interventions (eg, trial participants, care providers, outcome assessors, data analysts), and how                                                                                                                                                                                                                                                                    | 13    |
| 7  | (masking)                                                 |     |                                                                                                                                                                                                                                                                                                                                                                                                              |       |
| 8  |                                                           | 17b | If blinded, circumstances under which unblinding is permissible, and procedure for revealing a participant's allocated intervention during the trial                                                                                                                                                                                                                                                         | 13    |
| 9  |                                                           |     |                                                                                                                                                                                                                                                                                                                                                                                                              |       |
| 10 |                                                           |     |                                                                                                                                                                                                                                                                                                                                                                                                              |       |
| 11 |                                                           |     |                                                                                                                                                                                                                                                                                                                                                                                                              |       |
| 12 |                                                           |     |                                                                                                                                                                                                                                                                                                                                                                                                              |       |
| 13 | <b>Methods: Data collection, management, and analysis</b> |     |                                                                                                                                                                                                                                                                                                                                                                                                              |       |
| 14 |                                                           |     |                                                                                                                                                                                                                                                                                                                                                                                                              |       |
| 15 | Data                                                      | 18a | Plans for assessment and collection of outcome, baseline, and other trial data, including any related processes to promote data quality (eg, duplicate measurements, training of assessors) and a description of study instruments (eg, questionnaires, laboratory tests) along with their reliability and validity, if known. Reference to where data collection forms can be found, if not in the protocol | 13-14 |
| 16 | collection                                                |     |                                                                                                                                                                                                                                                                                                                                                                                                              |       |
| 17 | methods                                                   |     |                                                                                                                                                                                                                                                                                                                                                                                                              |       |
| 18 |                                                           | 18b | Plans to promote participant retention and complete follow-up, including list of any outcome data to be collected for participants who discontinue or deviate from intervention protocols                                                                                                                                                                                                                    | N/A   |
| 19 |                                                           |     |                                                                                                                                                                                                                                                                                                                                                                                                              |       |
| 20 |                                                           |     |                                                                                                                                                                                                                                                                                                                                                                                                              |       |
| 21 |                                                           |     |                                                                                                                                                                                                                                                                                                                                                                                                              |       |
| 22 | Data                                                      | 19  | Plans for data entry, coding, security, and storage, including any related processes to promote data quality (eg, double data entry; range checks for data values). Reference to where details of data management procedures can be found, if not in the protocol                                                                                                                                            | 14    |
| 23 | management                                                |     |                                                                                                                                                                                                                                                                                                                                                                                                              |       |
| 24 |                                                           |     |                                                                                                                                                                                                                                                                                                                                                                                                              |       |
| 25 |                                                           |     |                                                                                                                                                                                                                                                                                                                                                                                                              |       |
| 26 |                                                           |     |                                                                                                                                                                                                                                                                                                                                                                                                              |       |
| 27 |                                                           |     |                                                                                                                                                                                                                                                                                                                                                                                                              |       |
| 28 |                                                           |     |                                                                                                                                                                                                                                                                                                                                                                                                              |       |
| 29 |                                                           |     |                                                                                                                                                                                                                                                                                                                                                                                                              |       |
| 30 | Statistical                                               | 20a | Statistical methods for analysing primary and secondary outcomes. Reference to where other details of the statistical analysis plan can be found, if not in the protocol                                                                                                                                                                                                                                     | 14    |
| 31 | methods                                                   |     |                                                                                                                                                                                                                                                                                                                                                                                                              |       |
| 32 |                                                           | 20b | Methods for any additional analyses (eg, subgroup and adjusted analyses)                                                                                                                                                                                                                                                                                                                                     | 14    |
| 33 |                                                           |     |                                                                                                                                                                                                                                                                                                                                                                                                              |       |
| 34 |                                                           | 20c | Definition of analysis population relating to protocol non-adherence (eg, as randomised analysis), and any statistical methods to handle missing data (eg, multiple imputation)                                                                                                                                                                                                                              | 14    |
| 35 |                                                           |     |                                                                                                                                                                                                                                                                                                                                                                                                              |       |
| 36 |                                                           |     |                                                                                                                                                                                                                                                                                                                                                                                                              |       |
| 37 |                                                           |     |                                                                                                                                                                                                                                                                                                                                                                                                              |       |
| 38 |                                                           |     |                                                                                                                                                                                                                                                                                                                                                                                                              |       |
| 39 | <b>Methods: Monitoring</b>                                |     |                                                                                                                                                                                                                                                                                                                                                                                                              |       |
| 40 |                                                           |     |                                                                                                                                                                                                                                                                                                                                                                                                              |       |
| 41 |                                                           |     |                                                                                                                                                                                                                                                                                                                                                                                                              |       |
| 42 | Data                                                      | 21a | Composition of data monitoring committee (DMC); summary of its role and reporting structure; statement of whether it is independent from the sponsor and competing interests; and reference to where further details about its charter can be found, if not in the protocol. Alternatively, an explanation of why a DMC is not needed                                                                        | -     |
| 43 | monitoring                                                |     |                                                                                                                                                                                                                                                                                                                                                                                                              |       |
| 44 |                                                           | 21b | Description of any interim analyses and stopping guidelines, including who will have access to these interim results and make the final decision to terminate the trial                                                                                                                                                                                                                                      | -     |
| 45 |                                                           |     |                                                                                                                                                                                                                                                                                                                                                                                                              |       |
| 46 |                                                           |     |                                                                                                                                                                                                                                                                                                                                                                                                              |       |
| 47 |                                                           |     |                                                                                                                                                                                                                                                                                                                                                                                                              |       |
| 48 |                                                           |     |                                                                                                                                                                                                                                                                                                                                                                                                              |       |
| 49 |                                                           |     |                                                                                                                                                                                                                                                                                                                                                                                                              |       |
| 50 |                                                           |     |                                                                                                                                                                                                                                                                                                                                                                                                              |       |
| 51 | Harms                                                     | 22  | Plans for collecting, assessing, reporting, and managing solicited and spontaneously reported adverse events and other unintended effects of trial interventions or trial conduct                                                                                                                                                                                                                            | -     |
| 52 |                                                           |     |                                                                                                                                                                                                                                                                                                                                                                                                              |       |
| 53 |                                                           |     |                                                                                                                                                                                                                                                                                                                                                                                                              |       |
| 54 |                                                           |     |                                                                                                                                                                                                                                                                                                                                                                                                              |       |
| 55 | Auditing                                                  | 23  | Frequency and procedures for auditing trial conduct, if any, and whether the process will be independent from investigators and the sponsor                                                                                                                                                                                                                                                                  | N/A   |
| 56 |                                                           |     |                                                                                                                                                                                                                                                                                                                                                                                                              |       |
| 57 |                                                           |     |                                                                                                                                                                                                                                                                                                                                                                                                              |       |
| 58 | <b>Ethics and dissemination</b>                           |     |                                                                                                                                                                                                                                                                                                                                                                                                              |       |
| 59 |                                                           |     |                                                                                                                                                                                                                                                                                                                                                                                                              |       |
| 60 |                                                           |     |                                                                                                                                                                                                                                                                                                                                                                                                              |       |



|                               |     |                                                                                                                                                                                                                                                                                     |     |
|-------------------------------|-----|-------------------------------------------------------------------------------------------------------------------------------------------------------------------------------------------------------------------------------------------------------------------------------------|-----|
| Research ethics approval      | 24  | Plans for seeking research ethics committee/institutional review board (REC/IRB) approval                                                                                                                                                                                           | 15  |
| Protocol amendments           | 25  | Plans for communicating important protocol modifications (eg, changes to eligibility criteria, outcomes, analyses) to relevant parties (eg, investigators, REC/IRBs, trial participants, trial registries, journals, regulators)                                                    | 15  |
| Consent or assent             | 26a | Who will obtain informed consent or assent from potential trial participants or authorised surrogates, and how (see Item 32)                                                                                                                                                        | 15  |
|                               | 26b | Additional consent provisions for collection and use of participant data and biological specimens in ancillary studies, if applicable                                                                                                                                               |     |
| Confidentiality               | 27  | How personal information about potential and enrolled participants will be collected, shared, and maintained in order to protect confidentiality before, during, and after the trial                                                                                                | 15  |
| Declaration of interests      | 28  | Financial and other competing interests for principal investigators for the overall trial and each study site                                                                                                                                                                       |     |
| Access to data                | 29  | Statement of who will have access to the final trial dataset, and disclosure of contractual agreements that limit such access for investigators                                                                                                                                     | 15  |
| Ancillary and post-trial care | 30  | Provisions, if any, for ancillary and post-trial care, and for compensation to those who suffer harm from trial participation                                                                                                                                                       | -   |
| Dissemination policy          | 31a | Plans for investigators and sponsor to communicate trial results to participants, healthcare professionals, the public, and other relevant groups (eg, via publication, reporting in results databases, or other data sharing arrangements), including any publication restrictions | -   |
|                               | 31b | Authorship eligibility guidelines and any intended use of professional writers                                                                                                                                                                                                      |     |
|                               | 31c | Plans, if any, for granting public access to the full protocol, participant-level dataset, and statistical code                                                                                                                                                                     |     |
| <b>Appendices</b>             |     |                                                                                                                                                                                                                                                                                     |     |
| Informed consent materials    | 32  | Model consent form and other related documentation given to participants and authorised surrogates                                                                                                                                                                                  | N/A |
| Biological specimens          | 33  | Plans for collection, laboratory evaluation, and storage of biological specimens for genetic or molecular analysis in the current trial and for future use in ancillary studies, if applicable                                                                                      | N/A |

8
