# Supplementary material for: Comparative study of treatment interventions for patellar tendinopathy: a protocol for a randomised controlled trial
Source: PubMed Central journal article supplement — BMJ Open. 2020 Feb 16;10(2):e034304. doi: 10.1136/bmjopen-2019-034304 (PMC7045155; doi:10.1136/bmjopen-2019-034304), 2020-02-16
Supplement: bmjopen-2019-034304supp001.pdf [file bmjopen-2019-034304supp001.pdf]

## DOCUMENTO DE INFORMACIÓN AL PACIENTE

**Fecha:**

**Título del proyecto:** “ESTUDIO COMPARATIVO ENTRE TÉCNICAS DE PUNCIÓN PARA EL TRATAMIENTO DE LA TENDINOPATÍA CRÓNICA DEL TENDÓN ROTULIANO”

**Investigador principal:**

Doña: M<sup>a</sup> Pilar López Royo

Este estudio se basa en el estudio comparativo de tratamientos que utilizan distintas técnicas de fisioterapia invasiva junto con un programa de ejercicio excéntrico para el tratamiento de la tendinopatía rotuliana. Por medio del tratamiento se produce una disminución del dolor asociado a esta patología y un aumento de la fuerza de la pierna, lo que a su vez hace que mejore la funcionalidad en las actividades de la vida diaria y mejore la calidad de vida.

**PROCESO DE SELECCIÓN DE PACIENTES**Criterios de inclusión:

- Edad comprendida entre 18 y 40 años.
- Practicar cualquier deporte de forma habitual.
- Pacientes con diagnóstico médico de tendinopatía rotuliana crónica con un mínimo de 3 meses de evolución y con sintomatología.
- Dolor a la palpación del tendón en el polo inferior de la rótula y durante el entrenamiento o competición.
- Puntuación del cuestionario VISA-P menor de 80 (el resultado obtenido de rellenar el cuestionario tiene que ser menor de 80 puntos de los 100 posibles para poder participar en el estudio).

Criterios de exclusión:

- Paciente operado de la rodilla afectada en los últimos 6 meses.
- Infiltraciones en la rodilla afectada en los últimos 3 meses.
- Paciente que ha recibido tratamiento farmacológico o fisioterápico en las últimas 48 horas o durante el estudio.
- Patología con menos de 3 meses de evolución.
- Presentar tendinopatía rotuliana bilateral.
- Puntuación del cuestionario VISA-p mayor o igual de 80 (el resultado obtenido de rellenar el cuestionario no puede ser igual o superar los 80 puntos de los 100 posibles, sino no podrá participar en el estudio).
- Imposibilidad para aplicar alguna de las técnicas de tratamiento o valoración por

contraindicación absoluta o relativa.

## PROCEDIMIENTO

El tratamiento consiste en realizar un protocolo de ejercicios excéntricos de cuádriceps que realizará en casa de forma diaria, y que serán revisados con el fisioterapeuta para valorar su correcta realización. Se complementará el tratamiento con la aplicación de una técnica de punción según el protocolo de tratamiento propuesto de forma totalmente **aleatorizada** y según los criterios diagnósticos específicos de la misma, siguiendo las indicaciones, criterios de aplicación y criterios diagnósticos.

Son técnicas de punción cuyo objetivo es producir una respuesta inflamatoria aguda que active los mecanismos fisiológicos de regeneración del tejido y mejorar el dolor y la funcionalidad en la articulación de la rodilla, se realiza con agujas de punción seca, similares a las agujas de acupuntura y sin infiltrar ningún tipo de sustancia dentro del organismo.

Los registros serán realizados en el Espacio de Valoración Funcional de la Universidad San Jorge, en la Facultad de Ciencias de la Salud, Edificio III. Se pondrá a su disposición la posibilidad de utilizar el autobús que utiliza el personal y alumnado de la universidad (en el horario que éste esté disponible). Las fechas y horarios serán convenidas con cada participante en función de su disponibilidad y la de los investigadores, buscando la conformidad de todos. La duración aproximada del estudio para cada paciente será de 30 minutos, aunque este horario podrá variar en función de los acontecimientos.

Será recibido por los miembros del equipo de investigación y una vez allí, se le realizará un primer análisis fisioterápico, rellenará una encuesta, una escala analógica visual (EVA) del dolor y el cuestionario Visa-p en el que se valorará la funcionalidad de la rodilla.

Tras éste primer registro se le colocará un marcador pasivo en el pantalón. Se le pedirá que realice el siguiente protocolo:

- Calentamiento de 5 minutos en cinta a ritmo constante.
- Estiramientos dinámicos de psoas, cuádriceps, glúteo, gastrocnemios, isquiotibiales durante 5 minutos instruidos por el fisioterapeuta.
- Realización de los 3 saltos fuera de la plataforma durante 3 veces para que se familiarice con los tests.
- En la plataforma de fuerzas realizará 3 test de salto: el test de Abalakov (ABK), el test de salto con contramovimiento (CMJ) y el squatjump (SJ).

Se colocará en la plataforma y realizará 3 saltos de cada uno de los test con una separación entre ellos de 60 segundos.

Se valora el tendón por ecografía, y se recogen datos por medio de personal adiestrado y se envía

a personal especialista en radiodiagnóstico.

Tras los registros de los saltos se dará por finalizada la valoración.

Tras la 1ª valoración, se realizará una división en tres grupos de los pacientes de forma aleatorizada.

Se le realizará el protocolo de tratamiento de fisioterapia invasiva que le haya correspondido. Realizará una sesión del tratamiento cada 14 días, y se realizará la 2ª valoración 1 semana más tarde de la 4ª sesión de punción para valorar los cambios que se hayan producido tras el tratamiento, repitiéndose de nuevo el proceso de recogida de datos realizado al inicio del estudio. Se realizará un seguimiento a los tres meses de la valoración post-tratamiento para valorar la eficacia de la técnica a largo plazo del tratamiento.

El procedimiento se realizará guiado ecográficamente para asegurar la especificidad de aplicación sobre la zona relevante de tratamiento y garantizar la seguridad de la técnica. Se hace posterior a esta intervención una serie de ejercicios excéntricos de cuádriceps. El tratamiento se realizará durante 4 sesiones (a razón de una sesión cada 14 días).

## **RIESGOS**

La aplicación de las técnicas de punción utilizadas no han demostrado tener ningún efecto secundario hasta la fecha, aunque el paciente puede experimentar dolor durante y tras la punción, generalmente de uno o dos días de duración.

## **RESPONSABILIDADES DEL PARTICIPANTE**

La información que usted posea sobre su estado de salud o sobre sensaciones previas anormales al realizarle una punción, puede afectar la seguridad o el valor de estas pruebas. La rápida comunicación por su parte de las sensaciones que experimenta al realizar esta prueba es también de gran importancia. Usted es responsable de revelar esa información al personal de la prueba cuando se le pregunte.

## **PREGUNTAS**

Le animamos a que haga cualquier pregunta sobre los procedimientos seguidos o sus resultados en la prueba. Si tiene alguna preocupación o pregunta, por favor pídaenos más información, para ello le dejamos un correo electrónico [mapilr86@hotmail.com](mailto:mapilr86@hotmail.com) y un número de teléfono móvil: 616102365.

## **LIBERTAD PARA DAR EL CONSENTIMIENTO**

Usted participa en el estudio de manera voluntaria, pudiendo abandonarlo en el momento que considere oportuno, sin que esto conlleve ninguna repercusión negativa para usted.

Los datos obtenidos en el estudio serán confidenciales y únicamente se hará uso de ellos

para el cumplimiento de los objetivos planteados en la investigación. No se cederán estos datos a terceros sin el consentimiento expreso de los sujetos participantes a quienes pertenezcan los datos.

En esta investigación se garantizará el anonimato de los sujetos que aportan los datos, estableciendo un código disociado para identificarlos que sólo será conocido por los responsables de la realización del trabajo de campo.

Fdo: M<sup>a</sup> Pilar López Royo

**MODELO DE CONSENTIMIENTO INFORMADO**

**Título del PROYECTO: “ESTUDIO COMPARATIVO ENTRE TÉCNICAS DE PUNCIÓN PARA EL TRATAMIENTO DE LA TENDINOPATÍA CRÓNICA DEL TENDÓN ROTULIANO”**

Doña: M<sup>a</sup> Pilar López Royo ([mapilr86@hotmail.com](mailto:mapilr86@hotmail.com))  
Departamento de Fisiatría y Enfermería  
**UNIVERSIDAD DE ZARAGOZA**

**Yo, .....** (nombre y apellidos del participante)

He recibido suficiente información en relación con el proyecto, he leído la hoja de información que se me ha entregado y he podido hacer preguntas sobre el proyecto, recibiendo respuestas satisfactorias.

Entiendo que la participación es voluntaria y que puedo abandonar el proyecto:

- . Cuando lo desee
- . Sin tener que dar explicaciones
- . Sin que esto repercuta en mis cuidados médicos

He sido claramente informado de forma clara y precisa del tratado que recibirán mis datos personales que se contienen en este proyecto, sabiendo que los datos serán tratados y custodiados bajo mi intimidad y a la vigente normativa de la protección de datos, y que sobre estos datos me asisten los derechos de rectificación, acceso y oposición comunicándolo al investigador principal que figura en este consentimiento.

Declaro que presto libremente mi conformidad para participar en el estudio.

Deseo ser informado sobre los resultados del estudio:      sí      no      (marque lo que proceda)

Así pues, acepto que las muestras derivadas de este proyecto puedan ser utilizadas en futuras investigaciones siempre y cuando están relacionadas con ésta.

Por lo tanto, doy mi conformidad para que mis datos clínicos sean revisados por personal ajeno al centro, para los fines del estudio, y soy consciente de que este consentimiento es

revocable.

Firma del participante: \_\_\_\_\_

Fecha: \_\_\_\_\_

He explicado la naturaleza y el propósito del proyecto al paciente mencionado

Firma del Investigador: \_\_\_\_\_

Fecha: \_\_\_\_\_

Consentimiento informado estudio \_\_\_\_\_

Versión \_\_\_\_\_, fecha \_\_\_\_\_
